# Supplementary material for: Carbon monoxide-driven osmium catalyzed reductive amination harvesting WGSR power
Source: Royal Society of Chemistry journal article supplement (doi:10.1039/d1cy00695a), 2021-01-01
Supplement: d1cy00695a1.pdf [file d1cy00695a1.pdf]

## Supporting Information

|                                                                                                                         |           |
|-------------------------------------------------------------------------------------------------------------------------|-----------|
| <b>1. GENERAL INFORMATION .....</b>                                                                                     | <b>2</b>  |
| <b>2. SYNTHESIS OF OSMIUM COMPLEXES .....</b>                                                                           | <b>3</b>  |
| <b>3. CATALYST SCREENING AND CONDITIONS OPTIMIZATION: REACTION OF 4-METHOXYBENZALDEHYDE WITH 4-METHOXYANILINE .....</b> | <b>10</b> |
| <b>4. MECHANISTIC INVESTIGATIONS .....</b>                                                                              | <b>21</b> |
| <b>5. SYNTHESIS AND CHARACTERIZATION OF THE RA PRODUCTS .....</b>                                                       | <b>24</b> |
| <b>6. DETAILS OF DFT CALCULATIONS.....</b>                                                                              | <b>33</b> |
| <b>7. X-RAY INVESTIGATIONS .....</b>                                                                                    | <b>38</b> |
| <b>8. <sup>1</sup>H AND <sup>13</sup>C NMR SPECTRA AND HRMS OF THE OBTAINED OSMIUM COMPLEXES.....</b>                   | <b>40</b> |
| <b>9. <sup>1</sup>H AND <sup>13</sup>C NMR SPECTRA OF THE RA PRODUCTS. ....</b>                                         | <b>64</b> |
| <b>10. REFERENCES .....</b>                                                                                             | <b>80</b> |

## 1. General information

Unless otherwise stated, all reagents were purchased from commercial suppliers and used without further purification, THF was distilled over sodium/benzophenone.

Isolation of products was performed using column chromatography (Acros Organics, silica gel 0.06-0.200 mm) or using preparative flash chromatograph InterChim PuriFlash; DCM-MeOH binary system was used as an eluent. All details about particular chromatographic parameters are provided with the description of each compound.

$^1\text{H}$ ,  $^{13}\text{C}$ , and  $^{19}\text{F}$  spectra were recorded in  $\text{CDCl}_3$  on Bruker Avance 300, Bruker Avance 400, or Varian Inova 400 spectrometers. Chemical shifts are reported in parts per million relative to  $\text{CHCl}_3$  (7.26 and 77.16 ppm for  $^1\text{H}$  and  $^{13}\text{C}$  respectively). The following abbreviations were used to designate chemical shift multiplicities: s = singlet, d = doublet, dd = doublet of dublets, t = triplet, q = quartet, quint. = quintet, m = multiplet, br = broad, sept = septet; coupling constants are given in Hertz (Hz). NMR yields were determined with reference to an internal standard (dimethyl formamide).

High-resolution mass spectra (HRMS) were registered on a Bruker Daltonics micrOTOF-Q II hybrid quadrupole time-of-flight mass spectrometer using electrospray ionization (ESI); measurements were done in a positive ion mode. The voltage on the capillary was 4500 V; range of scanned masses,  $m/z$  50-3000; external calibration (Electrospray Calibrant Solution; Fluka, Germany); nebulizer pressure: 0.4 bar; flow rate: 3  $\mu\text{l}/\text{min}$ ; nitrogen as dry gas (6 l/min); interface temperature: 180  $^\circ\text{C}$ .

Analytical gas chromatography (GC) was performed using a Chromatec Crystal 5000.2 gas chromatograph fitted with a flame ionization detector (He was used as the carrier gas, 37 mL/min) and a MS detector. Chromatec CR-5 and Chromatec CR-5MS (30 meters) capillary column were used.

GC settings for the yield determination using FID detector and CR5 column:

The injector temperature was 250  $^\circ\text{C}$ , split ratio of 50:1 at the moment of injection, the FID temperature was 250  $^\circ\text{C}$ . Column compartment temperature program: 100 $^\circ\text{C}$  for 2 min, 100 $^\circ\text{C}$   $\rightarrow$  280 $^\circ\text{C}$  at 30 $^\circ\text{C}/\text{min}$ , 280 $^\circ\text{C}$  for 3 min. Flow rate 2 mL/min, column CR-5. Retention time for 4-methoxy-N-(4-methoxybenzyl)aniline is 10.2 min; for N,1-bis(4-methoxyphenyl)methanimine 10.4 min; for 4-methoxyaniline 5.5 min.

GC settings for the qualitative analysis using MS detector and CR5-ms column:

The injector temperature was 250  $^\circ\text{C}$ , split ratio of 75:1 at the moment of injection. Column compartment temperature program: 60 $^\circ\text{C}$  for 4 min, 60 $^\circ\text{C}$   $\rightarrow$  250 $^\circ\text{C}$  at 30 $^\circ\text{C}/\text{min}$ , 250 $^\circ\text{C}$  for 12 min. Flow rate 1 mL/min. MSD parameters: ion source temperature 200 $^\circ\text{C}$ , transfer line temperature 230 $^\circ\text{C}$ . Retention times ( $t_R$ ) and integrated ratios were obtained using Chromatec Analytic Software.

Reactions with pressure were carried out in autoclaves made from either stainless steel or titanium. The autoclave material had no effect on the reactions.

## 2. Synthesis of osmium complexes

Complexes **Os1** [(Cymene)OsCl<sub>2</sub>]<sub>2</sub><sup>1</sup>, **Os7** (2,2'-bipyridine)OsCl<sub>2</sub>(CO)<sub>2</sub><sup>2</sup>, **Os9** (2,2'-bipyridine)<sub>2</sub>OsCl<sub>2</sub><sup>3</sup>, **Os10** [(2,2'-bipyridine)<sub>2</sub>OsCl<sub>2</sub>]<sup>+</sup>Cl<sup>-3</sup> were prepared as described in the literature.

### [( $\eta^6$ -cymene)OsCl<sub>2</sub>]<sub>2</sub> (**Os1**)

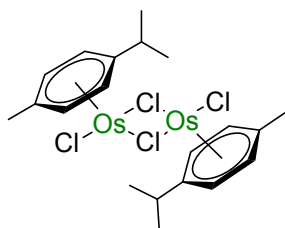

A mixture of Na<sub>2</sub>OsCl<sub>6</sub> (300 mg, 0.67 mmol), 1.5 ml of  $\gamma$ -terpinene (9.2 mmol) in EtOH (4 ml) was heated in a sealed tube at 100 °C for 4 hours under argon atmosphere. The reaction mixture was cooled to room temperature and evaporated to dryness *in vacuo*. The orange product was crushed in hexane, filtered off, washed with water and dried. Yield: 209 mg (79 %).

<sup>1</sup>H NMR (400 MHz, CDCl<sub>3</sub>)  $\delta$  6.20 (d,  $J$  = 6.4 Hz, 2H, Ar-H), 6.05 (d,  $J$  = 6.4 Hz, 2H, Ar-H), 2.80 (sept,  $J$  = 7.0 Hz, 1H, CH(Me)<sub>2</sub>), 2.22 (s, 3H, CH<sub>3</sub>C), 1.31 (d,  $J$  = 7.0 Hz, 6H, CH(CH<sub>3</sub>)<sub>2</sub>).

The obtained NMR data are in agreement with the literature report.<sup>1</sup>

### [( $\eta^6$ -cymene)OsI<sub>2</sub>]<sub>2</sub> (**Os2**)

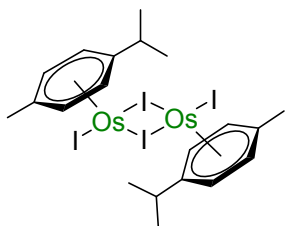

A mixture of [( $\eta^6$ -cymene)OsCl<sub>2</sub>]<sub>2</sub> (100 mg, 0.126 mmol) and NaI\*2H<sub>2</sub>O (300 mg, 1.61 mmol) was stirred in acetone (5 ml) at 100 °C in a sealed tube for 24 hours. The solvent was removed from the resulting dark-brown reaction mixture *in vacuo* and the residue was washed with water and dried. The product was extracted with CH<sub>2</sub>Cl<sub>2</sub>, precipitated by adding Et<sub>2</sub>O, filtered off and air-dried to afford 128 mg (88%) of red-brown crystals.

<sup>1</sup>H NMR (400 MHz, CDCl<sub>3</sub>)  $\delta$  6.06 (d,  $J$  = 5.5 Hz, 2H, Ar-H), 5.95 (d,  $J$  = 5.5 Hz, 2H, Ar-H), 2.84 (sept,  $J$  = 6.8 Hz, 1H, CH(Me)<sub>2</sub>), 2.32 (s, 3H, CH<sub>3</sub>C), 1.25 (d,  $J$  = 6.9 Hz, 6H, CH(CH<sub>3</sub>)<sub>2</sub>).

<sup>13</sup>C NMR (101 MHz, CDCl<sub>3</sub>)  $\delta$  96.1 (C<sub>Ar</sub>-C), 90.4 (C<sub>Ar</sub>-C), 75.3 (C<sub>Ar</sub>-H), 75.2 (C<sub>Ar</sub>-H), 31.7 (CH(Me)<sub>2</sub>), 22.8 (CH(CH<sub>3</sub>)<sub>2</sub>), 20.6 (CH<sub>3</sub>Ar).

HRMS (ESI-MS): calcd. for C<sub>12</sub>H<sub>17</sub>NOsI<sup>+</sup>, [( $\eta^6$ -cymene)Os(CH<sub>3</sub>CN)I]<sup>+</sup> 494.0015, found 494.0013

### **$[(\eta^6\text{-cymene})\text{Os}(2,2'\text{-bipyridine})\text{Cl}]\text{Cl}$ (Os3)**

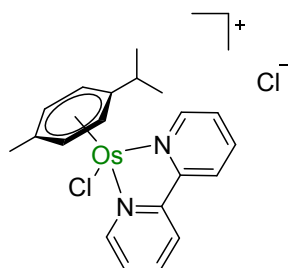

A solution of 2,2'-bipyridine (21 mg, 0.14 mmol) and  $[(\eta^6\text{-cymene})\text{OsCl}_2]_2$  (51 mg, 0.07 mmol) in methanol (3 ml) was stirred for 2 h at room temperature. The solvent volume was reduced *in vacuo* to ~0.5 ml and product crystallization was induced by the addition of Et<sub>2</sub>O. A formed yellow precipitate was recovered by filtration, washed with Et<sub>2</sub>O and air-dried. Yield 61 mg (86%).

<sup>1</sup>H NMR (400 MHz, CD<sub>3</sub>OD)  $\delta$  7.84 (d,  $J$  = 5.5 Hz, 2H, Ar-H (Bipy)), 7.03 (d,  $J$  = 8.1 Hz, 2H, Ar-H (Bipy)), 6.64 (t,  $J$  = 7.8 Hz, 2H, Ar-H (Bipy)), 6.14 (t,  $J$  = 6.6 Hz, 2H, Ar-H (Bipy)), 4.75 (d,  $J$  = 5.7 Hz, 2H, Ar-H (cymene)), 4.43 (d,  $J$  = 5.7 Hz, 2H, Ar-H (cymene)), 0.90 (sept,  $J$  = 6.9 Hz, 1H,  $\text{CH}(\text{Me})_2$ ), 0.75 (s, 3H, CH<sub>3</sub>C), -0.61 (d,  $J$  = 6.9 Hz, 6H, CH(CH<sub>3</sub>)<sub>2</sub>).

<sup>13</sup>C NMR (75 MHz, CD<sub>3</sub>OD)  $\delta$  157.1 (C<sub>Ar</sub>(Bipy)), 156.8 (C<sub>Ar</sub>(Bipy)), 141.2 (C<sub>Ar</sub>(Bipy)), 129.6 (C<sub>Ar</sub>(Bipy)), 125.1 (C<sub>Ar</sub>(Bipy)), 99.0 (C<sub>Ar</sub>-C (cymene)), 96.8 (C<sub>Ar</sub>-C (cymene)), 79.7 (C<sub>Ar</sub>-H (cymene)), 75.4 (C<sub>Ar</sub>-H (cymene)), 32.6 (CH(Me)<sub>2</sub>), 22.6 (CH(CH<sub>3</sub>)<sub>2</sub>), 18.9 (CH<sub>3</sub>Ar).

HRMS (ESI-MS): calcd. for C<sub>20</sub>H<sub>22</sub>N<sub>2</sub>OsCl<sup>+</sup> [M]<sup>+</sup> 517.1071, found 517.1068.

### **$[(\eta^6\text{-cymene})\text{Os}(\text{Bphen})\text{Cl}]\text{Cl}$ (Os4)**

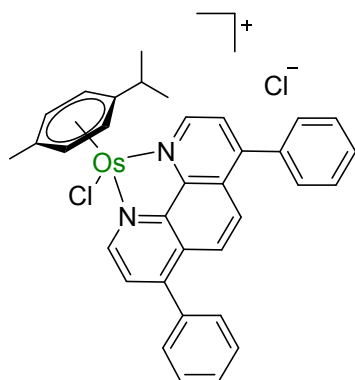

A mixture of  $[(\eta^6\text{-cymene})\text{OsCl}_2]_2$  (29 mg, 0.037 mmol) and bathophenanthroline (27 mg, 0.081 mmol) was stirred in acetone (3 ml) for 1 hour at room temperature. The reaction mixture was evaporated *in vacuo* to dryness and the product was recrystallized from CH<sub>2</sub>Cl<sub>2</sub> – Et<sub>2</sub>O. A formed yellow precipitate was recovered by filtration, washed with Et<sub>2</sub>O and air-dried. Yield 61 mg (72%).

<sup>1</sup>H NMR (400 MHz, CD<sub>3</sub>OD)  $\delta$  8.25 (d,  $J$  = 5.6 Hz, 2H, CH=N), 6.59 (s, 2H, CH in the central ring), 6.43 (d,  $J$  = 5.6 Hz, 2H, CHCH=N), 6.17 – 5.97 (m, 10H, Ph-rings), 4.93 (d,  $J$  = 5.9 Hz, 2H, Ar-H (cymene)), 4.64 (d,  $J$  = 5.9 Hz, 2H, Ar-H (cymene)), 1.09 – 0.88 (m, 1H, CH(Me)<sub>2</sub>), 0.76 (s, 3H, CH<sub>3</sub>C), -0.58 (d,  $J$  = 6.9 Hz, 6H, CH(CH<sub>3</sub>)<sub>2</sub>).

$^{13}\text{C}$  NMR (101 MHz,  $\text{CD}_3\text{OD}$ )  $\delta$  156.5, 152.8, 148.6, 136.5, 131.2, 131.1, 130.4, 130.1, 128.2, 127.1, 79.1 ( $\text{C}_{\text{Ar}}\text{-H}$  (cymene)), 76.1 ( $\text{C}_{\text{Ar}}\text{-H}$  (cymene)), 32.5 ( $\text{CH}(\text{Me})_2$ ), 22.7 ( $\text{CH}(\text{CH}_3)_2$ ), 18.9 ( $\text{CH}_3\text{Ar}$  (cymene)).

HRMS (ESI-MS): calcd. for  $\text{C}_{34}\text{H}_{30}\text{N}_2\text{OsCl}^+ [\text{M}]^+$  693.1698, found 693.1701.

### **$[(\eta^6\text{-cymene})\text{Os}(\text{Bphen})\text{Cl}]\text{BPh}_4$ (Os5)**

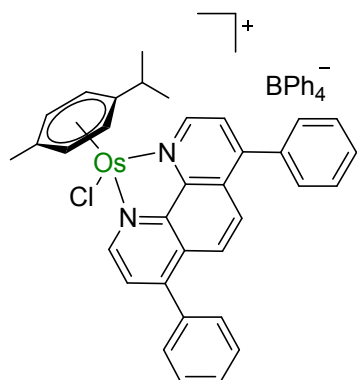

A mixture of  $[(\eta^6\text{-cymene})\text{OsCl}_2]_2$  (29 mg, 0.037 mmol) and bathophenanthroline (27 mg, 0.081 mmol) was stirred in acetone (3 ml) for 1 hour at room temperature. Solution of  $\text{NaBPh}_4$  (40 mg, 0.117 mmol) in water (10 ml) was added and acetone was removed *in vacuo*. The yellow product was filtered off, washed with water and air-dried. Subsequent recrystallization from  $\text{CH}_2\text{Cl}_2\text{-Et}_2\text{O}$  gave 64 mg of the product (86%).

$^1\text{H}$  NMR (400 MHz,  $\text{CDCl}_3$ )  $\delta$  8.87 (d,  $J = 5.1$  Hz, 2H,  $\text{CH}=\text{N}$ ), 8.04 (s, 2H, CH in the central ring), 7.62 – 7.57 (m, 6H), 7.52 – 7.44 (m, 14H), 6.96 (t,  $J = 7.3$  Hz, 8H), 6.83 (t,  $J = 7.1$  Hz, 4H), 5.59 (d,  $J = 5.1$  Hz, 2H, Ar-H (cymene)), 5.31 (d,  $J = 5.1$  Hz, 2H, Ar-H (cymene)), 2.38 – 2.31 (m, 1H,  $\text{CH}(\text{Me})_2$ ), 2.02 (s, 3H,  $\text{CH}_3\text{C}$ ), 0.93 (d,  $J = 6.8$  Hz, 6H,  $\text{CH}(\text{CH}_3)_2$ ).

$^{13}\text{C}$  NMR (101 MHz,  $\text{CDCl}_3$ )  $\delta$  163.2 (m appears as 4 peaks with equal intensity –  $\text{C}(\text{Ph})\text{-B}$ ), 154.4, 151.3, 147.3, 136.5, 134.7, 130.3, 130.0, 129.4, 128.7, 127.4, 126.0, 125.9, 122.2, 96.4 ( $\text{C}_{\text{Ar}}\text{-C}$  (cymene)), 94.9 ( $\text{C}_{\text{Ar}}\text{-C}$  (cymene)), 77.4 ( $\text{C}_{\text{Ar}}\text{-H}$  (cymene)), 75.1 ( $\text{C}_{\text{Ar}}\text{-H}$  (cymene)), 31.3 ( $\text{CH}(\text{Me})_2$ ), 22.5 ( $\text{CH}(\text{CH}_3)_2$ ), 18.7 ( $\text{CH}_3\text{Ar}$  (cymene)).

HRMS (ESI-MS): calcd. for  $\text{C}_{34}\text{H}_{30}\text{N}_2\text{OsCl}^+ [\text{M}]^+$  693.1698, found 693.1699.

### **$[(\eta^6\text{-cymene})\text{Os}(\text{Bphen})\text{I}]\text{PF}_6$ (Os6)**

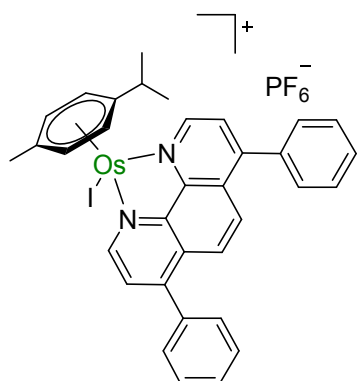

A mixture of  $[(\eta^6\text{-cymene})\text{OsI}_2]_2$  (31 mg, 0.027 mmol) and bathophenanthroline (19 mg, 0.057 mmol) was stirred in acetone (3 ml) for 1 hour at 50 °C. Then a solution of  $\text{KPF}_6$  (25 mg, 0.136 mmol) in

water (10 ml) was added and acetone was removed *in vacuo*. The red-orange product was filtered off, washed with water and air-dried. Subsequent recrystallization from CH<sub>2</sub>Cl<sub>2</sub>-Et<sub>2</sub>O gave 46 mg of the iodide (92%).

<sup>1</sup>H NMR (400 MHz, CDCl<sub>3</sub>) δ 9.63 (d, *J* = 5.6 Hz, 2H, CH=N), 8.09 (s, 2H, CH in the central ring), 7.92 (d, *J* = 5.6 Hz, 2H, CHCH=N), 7.58 (m, appears as br s, 10H, Ph rings), 6.23 (d, *J* = 5.8 Hz, 2H, Ar-H(cymene)), 6.07 (d, *J* = 5.8 Hz, 2H, Ar-H(cymene)), 2.81 (sept, *J* = 6.8 Hz, 1H, CH(Me)<sub>2</sub>), 2.40 (s, 3H, CH<sub>3</sub>C), 1.08 (d, *J* = 6.8 Hz, 6H, CH(CH<sub>3</sub>)<sub>2</sub>).

<sup>13</sup>C NMR (101 MHz, CDCl<sub>3</sub>) δ 155.7, 150.7, 147.0, 134.6, 129.8, 129.0, 128.5, 126.9, 125.7, 98.3 (C<sub>Ar</sub>-C (cymene)), 93.66 (C<sub>Ar</sub>-C (cymene)), 76.52 (C<sub>Ar</sub>-H (cymene)), 76.48 (C<sub>Ar</sub>-H (cymene)), 31.6 ((CH<sub>3</sub>)<sub>2</sub>CHAr (Cymene)), 22.1 ((CH<sub>3</sub>)<sub>2</sub>CHAr (Cymene)), 19.7 (CH<sub>3</sub>Ar (cymene)).

HRMS (ESI-MS): calcd. for C<sub>34</sub>H<sub>30</sub>N<sub>2</sub>OsI<sup>+</sup> [M]<sup>+</sup> 785.1065, found 785.1064.

### (2,2'-bipyridine)OsCl<sub>2</sub>(CO)<sub>2</sub> (Os7)

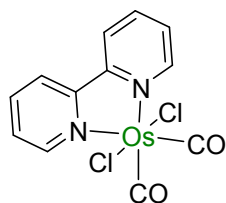

A 10 ml stainless steel autoclave was charged with Na<sub>2</sub>OsCl<sub>6</sub> (61 mg, 0.136 mmol), 2,2'-bipyridine (22 mg, 0.138 mmol), formic acid (1.5 ml) and 37% formaldehyde in water (0.3 ml). The autoclave was sealed, flushed three times with 10 atm of CO, and then pressurized with 30 atm of CO. The reactor was placed into a preheated to 120°C oil bath. After 20h, the reactor was cooled to room temperature and depressurized. The solvent was removed from the reaction mixture *in vacuo* and the crude product was extracted by CH<sub>2</sub>Cl<sub>2</sub>. Organic extracts were concentrated and the residue was purified using column chromatography (Al<sub>2</sub>O<sub>3</sub> was used as stationary phase), eluent: CH<sub>2</sub>Cl<sub>2</sub>. After concentrating the mixture *in vacuo* to ~1 ml, the complex was crystallized by addition of hexane. The formed yellow solid was filtered off and air-dried. Yield 14 mg (22%).

<sup>1</sup>H NMR (400 MHz, CDCl<sub>3</sub>) δ 9.14 (d, *J* = 5.4 Hz, 2H), 8.25 (d, *J* = 8.1 Hz, 2H), 8.17 – 8.10 (m, 2H), 7.79 – 7.53 (m, 2H).

<sup>13</sup>C NMR (101 MHz, CDCl<sub>3</sub>) δ 177.4, 155.6, 153.1, 139.9, 128.1, 123.5.

HRMS (ESI-MS): calcd. for C<sub>12</sub>H<sub>8</sub>N<sub>2</sub>ClOsO<sub>2</sub><sup>+</sup> [M – Cl]<sup>+</sup> 438.9873, found 438.9863.

### (Bphen)OsCl<sub>2</sub>(CO)<sub>2</sub> (Os8)

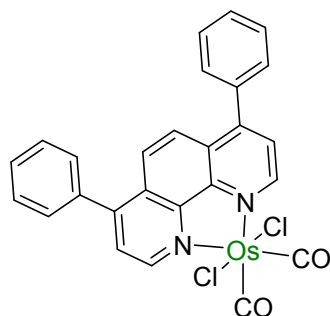

A 10 ml stainless steel autoclave was charged with  $\text{Na}_2\text{OsCl}_6$  (61 mg, 0.136 mmol), bathophenanthroline (46 mg, 0.138 mmol), formic acid (1.5 ml) and 37% formaldehyde in water (0.3 ml). The autoclave was sealed, flushed three times with 10 atm of  $\text{CO}$ , and then pressurized with 30 atm of  $\text{CO}$ . The reactor was placed into a preheated to  $120^\circ\text{C}$  oil bath. After 20h, the reactor was cooled to room temperature and depressurized. The solvent was removed from the reaction mixture *in vacuo* and the crude product was extracted by  $\text{CH}_2\text{Cl}_2$ . Organic extracts were concentrated and the residue was purified using column chromatography ( $\text{Al}_2\text{O}_3$  was used as stationary phase), eluent:  $\text{CH}_2\text{Cl}_2$ . After concentrating the mixture *in vacuo* to  $\sim 1$  ml, the complex was crystallized by addition of hexane. The formed yellow solid was filtered off and air-dried. Yield 38 mg (43%).

$^1\text{H}$  NMR (400 MHz,  $\text{CDCl}_3$ )  $\delta$  9.48 (d,  $J = 5.4$  Hz, 2H,  $\text{CH}=\text{N}$ ), 8.10 (s, 2H, CH in the central ring), 7.90 (d,  $J = 5.4$  Hz, 2H,  $\text{CHCH}=\text{N}$ ), 7.65 – 7.61 (m, 6H, Ph ring), 7.56 – 7.54 (m, 4H, Ph ring).

$^{13}\text{C}$  NMR (101 MHz,  $\text{CDCl}_3$ )  $\delta$  177.6 ( $\text{C}_q=\text{N}$ ), 152.2 ( $\text{CH}=\text{N}$ ), 147.4 ( $\text{C}_q\text{Ph}$ ), 135.2 ( $\text{C}_q\text{C}_q\text{Ph}$ ), 130.2, 129.7, 129.5, 129.4, 126.6, 126.1.

HRMS (ESI-MS): calcd. for  $\text{C}_{26}\text{H}_{16}\text{N}_2\text{OsCl}_2\text{O}_2\text{Na}^+ [\text{M}+\text{Na}]^+$  672.9964, found 672.9985.

### (2,2'-bipyridine) $_2\text{OsCl}_2$ (Os9)

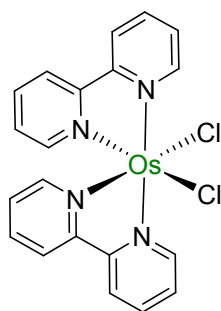

To a stirred solution of  $[(\text{bipy})_2\text{OsCl}_2]\text{Cl}$  (20 mg, 0.033 mmol) in methanol (4 ml) a solution of  $\text{Na}_2\text{S}_2\text{O}_4$  (50 mg, 0.29 mmol) in water (1 ml) was added in one portion at room temperature. The color of a solution immediately changed from brown to mulberry-red. The mixture was stirred for 30 min. 3 ml of water was then added and the reaction mixture was stored at  $6^\circ\text{C}$  for an hour to complete crystallization of a product. Almost black solid precipitate of  $(\text{bipy})_2\text{OsCl}_2$  was filtered off, washed with water, methanol, dried and recrystallized from  $\text{CH}_2\text{Cl}_2$  – hexane mixture. Yield 16 mg (85%).

$^1\text{H}$  NMR (300 MHz,  $\text{CD}_2\text{Cl}_2$ )  $\delta$  8.71 (s, 2H), 8.26 (s, 2H), 8.16 (d,  $J = 7.5$  Hz, 2H), 7.65 – 7.45 (m, 2H), 7.11 (s, 2H), 6.88 (s, 2H), 6.78 (s, 2H), 6.12 (s, 2H).

HRMS (ESI-MS) of both  $(\text{bipy})_2\text{OsCl}_2$  and  $[(\text{bipy})_2\text{OsCl}_2]\text{Cl}$  exhibits the only peak cluster corresponding to  $[(\text{bipy})_2\text{OsCl}_2]^+$ . This could be assigned to the oxidation of  $(\text{bipy})_2\text{OsCl}_2$  during the analysis: calcd. for  $\text{C}_{20}\text{H}_{16}\text{N}_4\text{Cl}_2\text{Os}^+$  574.0342, found 574.0364.

### (2,2'-bipyridine)<sub>2</sub>OsCl<sub>3</sub> (Os10)

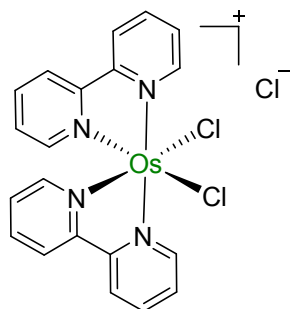

A mixture of Na<sub>2</sub>OsCl<sub>6</sub> (147 mg, 0.33 mmol) and 2,2'-bipyridine (103 mg, 0.66 mmol) was refluxed in DMF (4 ml) under argon for 1 hour. The solution was cooled down and the formed NaCl was filtered off. The DMF was removed *in vacuo*, the product was extracted with methanol from the residue and diethyl ether was added to the extract. The crystallized brown [(bipy)<sub>2</sub>OsCl<sub>2</sub>]Cl was filtered off and recrystallized from methanol – diethyl ether once again. After filtration, washing with diethyl ether and drying 134 mg (67%) of [(bipy)<sub>2</sub>OsCl<sub>2</sub>]Cl was obtained.

<sup>1</sup>H NMR (400 MHz, CD<sub>3</sub>OD *all signals appear as broad singlets*) δ 21.98, 17.97, 11.98, 7.72, -7.28, -11.39, -44.00, -51.67.

HRMS (ESI-MS) of both (bipy)<sub>2</sub>OsCl<sub>2</sub> and [(bipy)<sub>2</sub>OsCl<sub>2</sub>]Cl exhibits the only peak cluster corresponding to [(bipy)<sub>2</sub>OsCl<sub>2</sub>]<sup>+</sup>. calcd. for C<sub>20</sub>H<sub>16</sub>N<sub>4</sub>Cl<sub>2</sub>Os<sup>+</sup> 574.0342, found 574.0364.

### [(η<sup>6</sup>-cymene)Os(N,C-napht)Cl] (Os11)

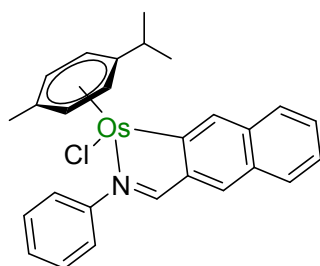

A mixture of [(η<sup>6</sup>-cymene)OsCl<sub>2</sub>]<sub>2</sub> (31.7 mg, 0.040 mmol), TIOAc (21.1 mg, 0.080 mmol) and Schiff base (0.084 mmol) was stirred in methanol (2 ml) at 100 °C in a sealed tube and under argon atmosphere for 4 hours. The solvent was removed from the reaction mixture *in vacuo*, the residue was separated on SiO<sub>2</sub> with CH<sub>2</sub>Cl<sub>2</sub> as eluent. After removing of the solvents *in vacuo* the product was obtained as orange-red crystals. Yield 21 mg (44%).

<sup>1</sup>H NMR (400 MHz, CDCl<sub>3</sub>) δ 8.44 (br s, 1H, CH in *ortho*-position to Os), 8.35 (br s, 1H, CH in *ortho*-position to C=N group), 8.13 (br s, 1H, CH=N), 7.74 – 7.67 (m, 4H, Ar-H), 7.42 – 7.25 (m, 6H, Ar-H), 5.63 (br s, 1H, Ar-H(cymene)), 5.09 – 5.01 (m, 3H, Ar-H(cymene)), 2.23 (m, 1H, CH(Me)<sub>2</sub>), 2.20 (s, 3H, CH<sub>3</sub>Ar), 0.95 (br s, 3H, CH<sub>3</sub>C), 0.75 (br s, 3H, CH<sub>3</sub>C).

<sup>13</sup>C NMR (101 MHz, CDCl<sub>3</sub>) δ 174.7, 163.9, 155.5, 147.4, 136.2, 130.8, 129.1, 127.9, 126.7, 123.8, 123.0, 96.6, 90.9, 83.9, 80.6, 72.9, 71.3, 31.2 ((CH<sub>3</sub>)<sub>2</sub>CHAr (Cymene)), 23.6 ((CH<sub>3</sub>)<sub>2</sub>CHAr (Cymene)), 21.7 ((CH<sub>3</sub>)<sub>2</sub>CHAr (Cymene)), 18.8 (CH<sub>3</sub>Ar (cymene)).

HRMS (ESI-MS): calcd. for C<sub>27</sub>H<sub>26</sub>NOsCl<sup>+</sup> [M]<sup>+</sup> 591.1353, found 591.1349.



**$[(\eta^6\text{-cymene})\text{Os}(\text{N,C-anis})\text{Cl}]$  (Os12)**

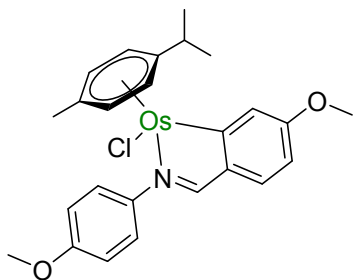

A mixture of  $[(\eta^6\text{-cymene})\text{OsCl}_2]_2$  (31.7 mg, 0.040 mmol), TIOAc (21.1 mg, 0.080 mmol) and Schiff base (0.084 mmol) was stirred in methanol (2 ml) at 100 °C in a sealed tube and under argon atmosphere for 4 hours. The solvent was removed from the reaction mixture *in vacuo*, the residue was separated on  $\text{SiO}_2$  with  $\text{CH}_2\text{Cl}_2$  as eluent. After removing of the solvents *in vacuo* the product was obtained as orange-red crystals. Yield 41 mg (86%).

$^1\text{H}$  NMR (400 MHz,  $\text{CDCl}_3$ )  $\delta$  8.12 (s, 1H, CH=N), 7.73 – 7.41 (m, 4H, Ar-H in *ortho*-position to N=C group + Ar-H in *ortho* position to OMe in the anisaldehyde moiety), 6.88 (d,  $J$  = 8.8 Hz, 2H, Ar-H in *ortho*-position to OMe group in anisidine moiety), 6.55 (dd,  $J$  = 8.4, 2.4 Hz, 1H, Ar-H in *ortho*-position to C=N group), 5.50 (d,  $J$  = 5.5 Hz, 1H, Ar-H(cymene)), 5.04 (dd,  $J$  = 8.4, 4.8 Hz, 3H, Ar-H(cymene)), 3.90 (s, 3H,  $\text{CH}_3\text{O}$ ), 3.86 (s, 3H,  $\text{CH}_3\text{O}$ ), 2.29 (sept, 6.9 Hz, 1H,  $\text{CH}(\text{Me})_2$ ), 2.17 (s, 3H,  $\text{CH}_3\text{Ar}$ ), 0.97 (d,  $J$  = 6.9 Hz, 3H,  $\text{CH}_3\text{C}$ ), 0.81 (d,  $J$  = 6.9 Hz, 3H,  $\text{CH}_3\text{C}$ ).

$^{13}\text{C}$  NMR (101 MHz,  $\text{CDCl}_3$ )  $\delta$  176.4, 172.0, 161.7, 158.6, 149.1, 140.9, 131.1, 124.0, 122.9, 113.8, 109.2, 95.9, 90.7, 83.2, 79.9, 73.9, 71.9, 55.7 ( $\text{CH}_3\text{O}$ ), 55.2 ( $\text{CH}_3\text{O}$ ), 31.3 ( $(\text{CH}_3)_2\text{CHAr}$  (Cymene)), 23.5 ( $(\text{CH}_3)_2\text{CHAr}$  (Cymene)), 21.7 ( $(\text{CH}_3)_2\text{CHAr}$  (Cymene)), 18.7 ( $\text{CH}_3\text{Ar}$  (Cymene)).

HRMS (ESI-MS): calcd. for  $\text{C}_{25}\text{H}_{28}\text{NO}_2\text{OsCl}^+$   $[\text{M}]^+$  601.1415, found 601.1419.

### 3. Catalyst Screening and Conditions Optimization: Reaction of 4-methoxybenzaldehyde with 4-methoxyaniline

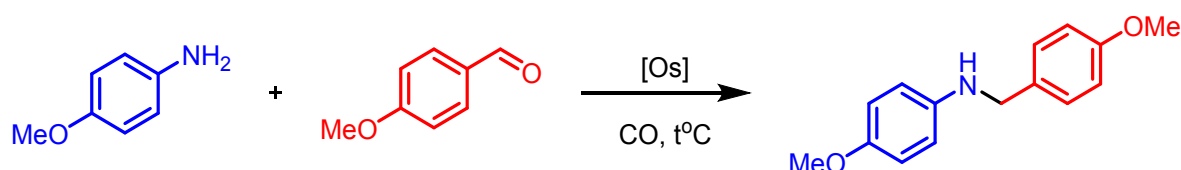

**General procedure:** A glass vial in a 10 mL stainless steel or titanium autoclave was charged with the prescribed quantity of the catalyst, co-catalyst, 4-methoxyaniline (24.7 – 98.8 mg, 50-200 mol %, 0.1 - 0.4 mmol), 4-methoxybenzaldehyde (48.8  $\mu\text{L}$ , 100 mol%, 0.4 mmol) and 0.4 mL of the corresponding solvent if mentioned. The autoclave was sealed, flushed three times with 10 bar of CO, then charged with the indicated pressure of CO. The reactor was placed into a preheated oil bath. After the indicated time, the reactor was cooled down to room temperature and depressurized. The reaction mixture was transferred into a measuring flask and diluted with dichloromethane to 5 mL, and then a sample of the resulting solution was analyzed by GC. Unless otherwise mentioned, the yields were determined by GC.

All experiments were reproduced at least two times.

**Table S1 Comparison of catalytic activity of different complexes.**

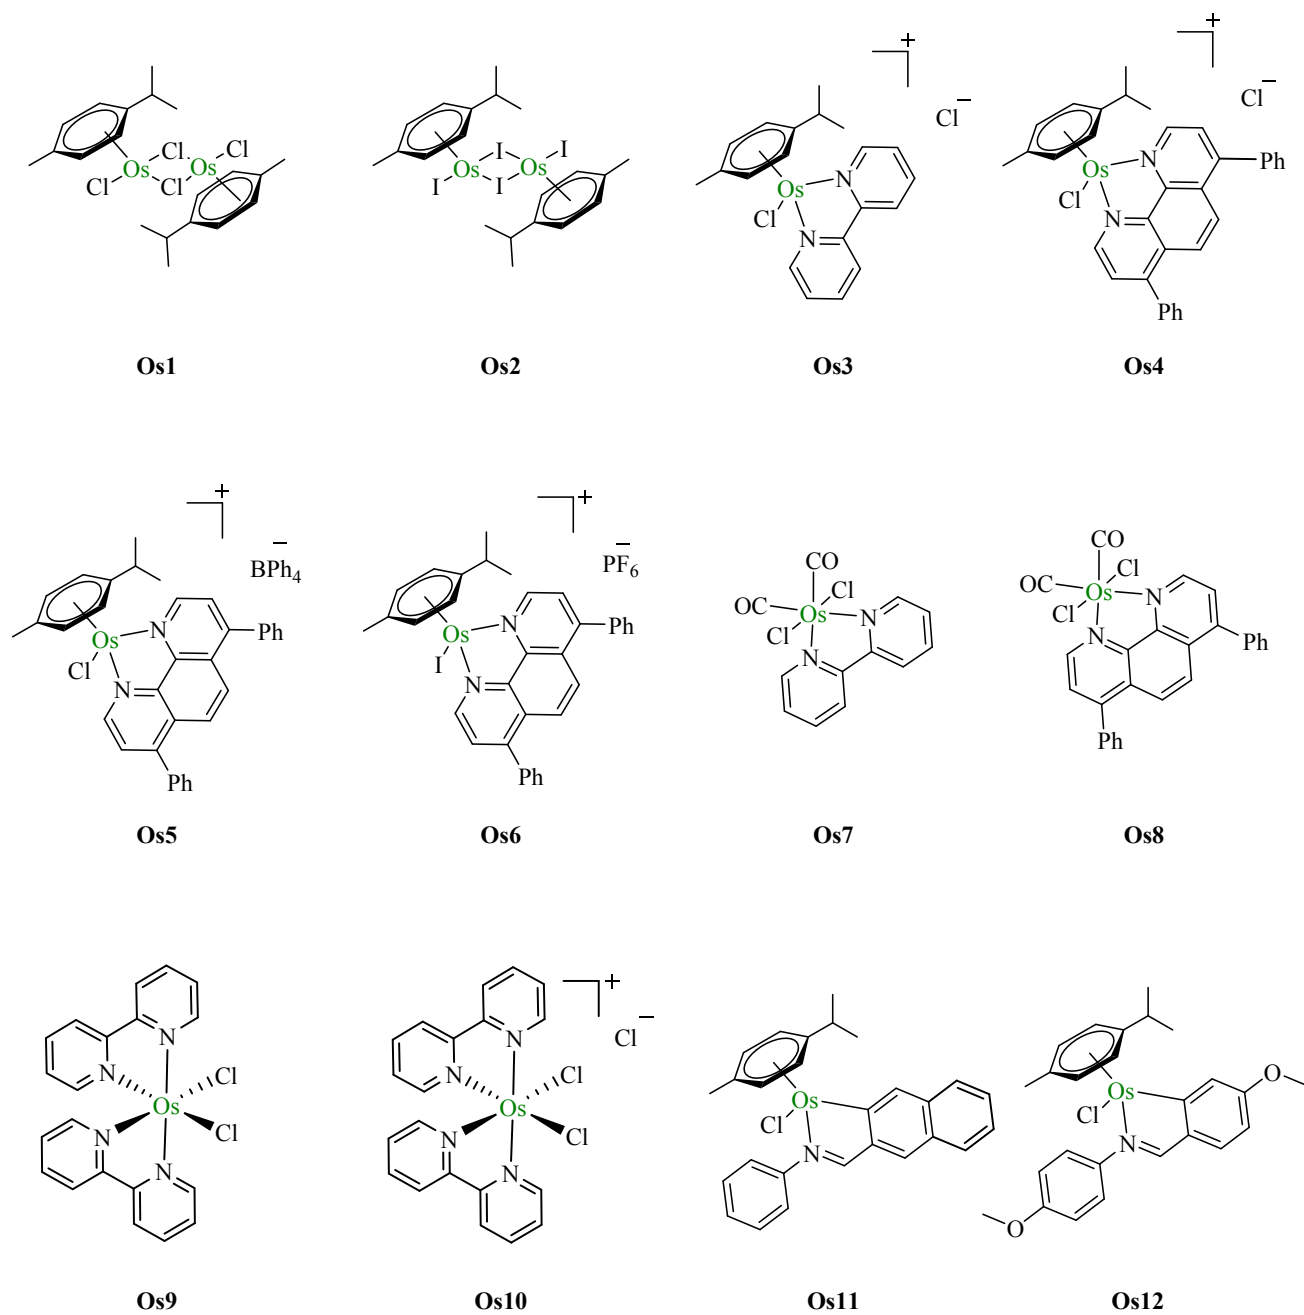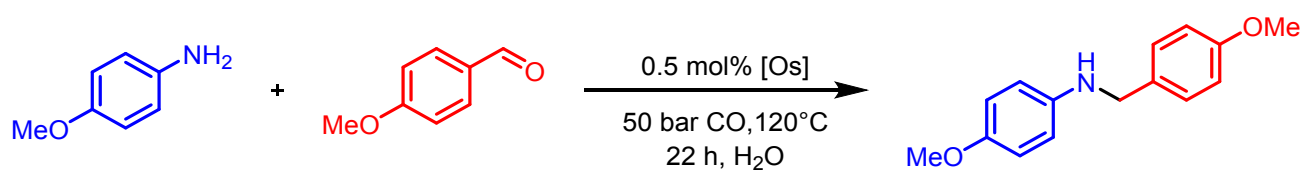

| Entry <sup>a</sup> | Catalyst                          | Yield <sup>b</sup> , % |
|--------------------|-----------------------------------|------------------------|
| 1                  | Na <sub>2</sub> OsCl <sub>6</sub> | 1                      |
| 2                  | <b>Os1</b>                        | 8                      |
| 3                  | <b>Os2</b>                        | 13                     |

|    |             |        |
|----|-------------|--------|
| 4  | <b>Os3</b>  | 94     |
| 5  | <b>Os4</b>  | 84     |
| 6  | <b>Os5</b>  | 98     |
| 7  | <b>Os6</b>  | 80     |
| 8  | <b>Os7</b>  | 81     |
| 9  | <b>Os8</b>  | 99     |
| 10 | <b>Os9</b>  | Traces |
| 11 | <b>Os10</b> | 2      |
| 12 | <b>Os11</b> | 10     |
| 13 | <b>Os12</b> | Traces |

<sup>a</sup>Osmium catalyst (0.5 mol% [Os]), 98.8 mg (0.8 mmol) 4-methoxyaniline, 48.8  $\mu$ L (0.4 mmol) 4-methoxybenzaldehyde, 400  $\mu$ L H<sub>2</sub>O, 50 bar CO, 120 °C, 22 h.

<sup>b</sup> Yields of the experiments were determined by GC.

**Table S2. Investigation of the effects of ancillary anions.**

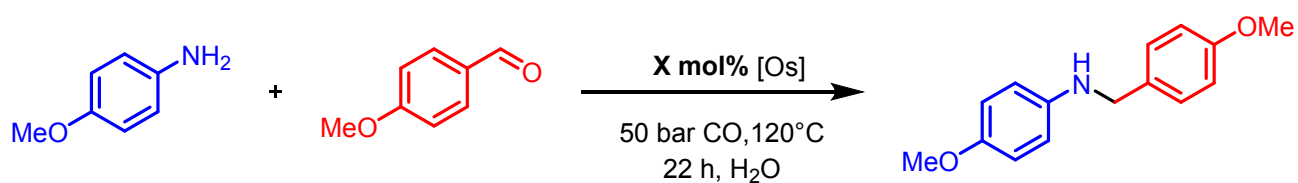

| Entry  | [Os]<br>Loading,<br>mol% | <b>Os1</b> + Bphen <sup>a</sup> ,<br>% | <b>Os4</b> <sup>b</sup> ,<br>% | <b>Os6</b> <sup>b</sup> , % |
|--------|--------------------------|----------------------------------------|--------------------------------|-----------------------------|
| Anions | -                        | Cl                                     | Cl                             | I, PF <sub>6</sub>          |
| 1      | 0.5                      | 98                                     | 84                             | 80                          |
| 2      | 0.25                     | 99                                     | 79                             | 2                           |
| 3      | 0.125                    | 85                                     | 53                             | 2                           |

<sup>a</sup>98.8 mg (0.8 mmol) 4-methoxyaniline, 48.8  $\mu$ L (0.4 mmol) 4-methoxybenzaldehyde, 0.25-0.0625 mol% of catalyst, 1.5-0.375 mol% of bathophenanthroline **L3** 2-0,5 mg (6.0-1.5  $\mu$ mol), 400  $\mu$ L of H<sub>2</sub>O, 50 bar CO, 120°C, 22 h. Yields of the experiments were determined by GC.

<sup>b</sup>98.8 mg (0.8 mmol) 4-methoxyaniline, 48.8  $\mu$ L (0.4 mmol) 4-methoxybenzaldehyde, 0.5-0.0625 mol% of catalyst, 400  $\mu$ L of H<sub>2</sub>O, 50 bar CO, 120°C, 22 h. Yields of the experiments were determined by GC

**Table S3. Investigation of the effects of ancillary ligands.**

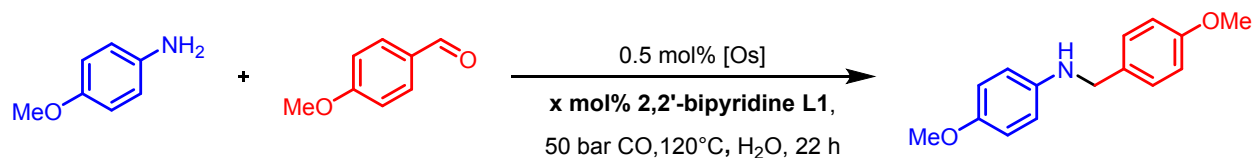

| Entry           | Catalyst                          | 2,2'-bipyridine L1, mol% | Yield <sup>c</sup> , % |
|-----------------|-----------------------------------|--------------------------|------------------------|
| 1 <sup>a</sup>  | Na <sub>2</sub> OsCl <sub>6</sub> | -                        | 1                      |
| 2 <sup>b</sup>  | Na <sub>2</sub> OsCl <sub>6</sub> | 1.5                      | 89                     |
| 3 <sup>a</sup>  | <b>Os1</b>                        | -                        | 8                      |
| 4 <sup>b</sup>  | <b>Os1</b>                        | 1.5                      | 89                     |
| 5 <sup>a</sup>  | <b>Os2</b>                        | -                        | 13                     |
| 6 <sup>b</sup>  | <b>Os2</b>                        | 1.5                      | 99                     |
| 7 <sup>a</sup>  | <b>Os9</b>                        | -                        | Traces                 |
| 8 <sup>b</sup>  | <b>Os9</b>                        | 1.5                      | 5                      |
| 9 <sup>a</sup>  | <b>Os10</b>                       | -                        | 2                      |
| 10 <sup>b</sup> | <b>Os10</b>                       | 1.5                      | 2                      |
| 11 <sup>a</sup> | <b>Os11</b>                       | -                        | 10                     |
| 12 <sup>b</sup> | <b>Os11</b>                       | 1.5                      | 71                     |
| 13 <sup>a</sup> | <b>Os12</b>                       | -                        | Traces                 |
| 14 <sup>b</sup> | <b>Os12</b>                       | 1.5                      | 15                     |

<sup>a</sup>Osmium catalyst (0.5 mol% [Os]), 98.8 mg (0.8 mmol) 4-methoxyaniline, 48.8 μL (0.4 mmol) 4-methoxybenzaldehyde, 400 μL of H<sub>2</sub>O, 50 bar CO, 120°C, 22 h.

<sup>b</sup>Osmium catalyst (0.5 mol% [Os]), **2,2'-bipyridine L1 0.96 mg (6.0 μmol)**, 98.8 mg (0.8 mmol) 4-methoxyaniline, 48.8 μL (0.4 mmol) 4-methoxybenzaldehyde, 400 μL of H<sub>2</sub>O, 50 bar CO, 120°C, 22 h.

<sup>c</sup> Yields of the experiments were determined by GC.

**Table S4. Investigation of the effect of 2,2'-bipyridine amount**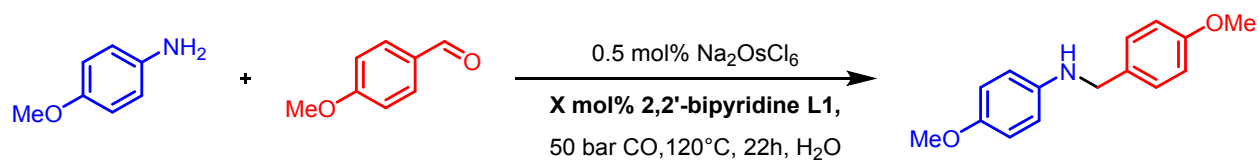

| Entry <sup>a</sup> | 2,2'-bipyridine, mol% | Yield <sup>b</sup> , % |
|--------------------|-----------------------|------------------------|
| 1                  | 0.5                   | 77                     |
| 2                  | 1.0                   | 79                     |
| 3                  | 1.5                   | 89                     |
| 4                  | 2.5                   | 93                     |
| 5                  | 5                     | 91                     |

<sup>a</sup>Na<sub>2</sub>OsCl<sub>6</sub> 0.9 mg (2.0 μmol), 2,2'-bipyridine L1 0.32-3.2 mg (2.0–20 μmol), 98.8 mg (0.8 mmol) 4-methoxyaniline, 48.8 μL (0.4 mmol) 4-methoxybenzaldehyde, 400 μL H<sub>2</sub>O, 50 bar CO, 120°C, 22 h.

<sup>b</sup>Yields of the experiments were determined by GC.

**Table S5. Screening of ancillary ligands (Na<sub>2</sub>OsCl<sub>6</sub>).**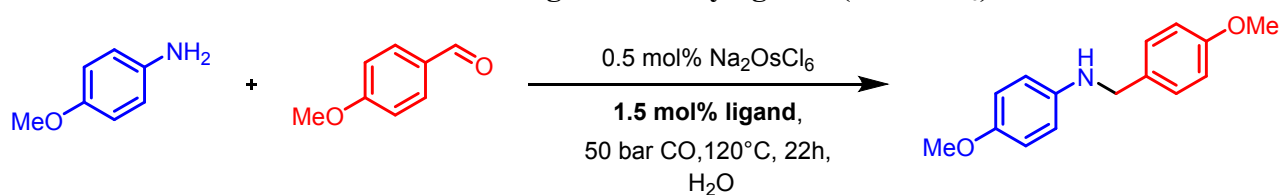

| Entry <sup>a</sup> | Ligand                         | Yield <sup>b</sup> , % |
|--------------------|--------------------------------|------------------------|
| 1                  | 2,2'-bipyridine L1             | 89                     |
| 2                  | 7,8-benzoquinoline L2          | 4                      |
| 3                  | Bathophenanthroline L3         | 99                     |
| 4                  | 2,2'-biquinoline L4            | 5                      |
| 5                  | Neocuproine L5                 | 4                      |
| 6                  | 2,3-Bis(2-pyridyl)-pyrazine L6 | 11                     |
| 7                  | 1,10-phenanthroline L7         | 99                     |

<sup>a</sup>Na<sub>2</sub>OsCl<sub>6</sub> 0.9 mg (2.0 μmol), 1.5 mol% of ligand, 98.8 mg (0.8 mmol) 4-methoxyaniline, 48.8 μL (0.4 mmol) 4-methoxybenzaldehyde, 400 μL H<sub>2</sub>O, 50 bar CO, 120°C, 22 h.

<sup>b</sup>Yields of the experiments were determined by GC.

**Table S6. Screening of ancillary ligands ( $[(p\text{-cymene})\text{OsCl}_2]_2$ , **Os1**).**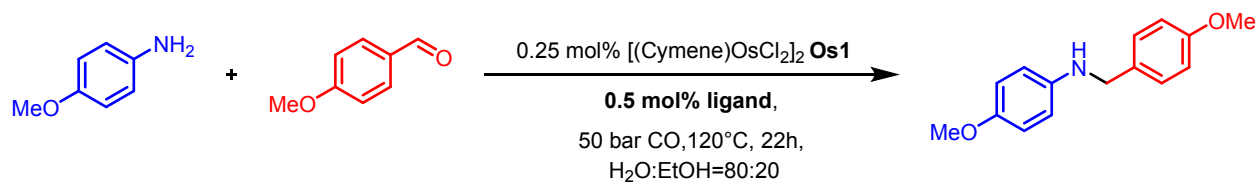

| Entry <sup>a</sup> | Ligand                                | Yield <sup>b</sup> , % |
|--------------------|---------------------------------------|------------------------|
| 1                  | 2,2'-bipyridine <b>L1</b>             | 96                     |
| 2                  | 7,8-benzoquinoline <b>L2</b>          | 7                      |
| 3                  | Bathophenanthroline <b>L3</b>         | 74                     |
| 4                  | 2,2'-biquinoline <b>L4</b>            | 3                      |
| 5                  | Neocuproine <b>L5</b>                 | 8                      |
| 6                  | 2,3-Bis(2-pyridyl)-pyrazine <b>L6</b> | 41                     |
| 7                  | 1,10-phenanthroline <b>L7</b>         | 71                     |

<sup>a</sup>Osmium catalyst **Os1** 0.8 mg (1.0  $\mu\text{mol}$ ), 0.5 mol% of ligand, 98.8 mg (0.8 mmol), 4-methoxyaniline, 48.8  $\mu\text{L}$  (0.4 mmol) 4-methoxybenzaldehyde, 320  $\mu\text{L}$   $\text{H}_2\text{O}$  + 80  $\mu\text{L}$  EtOH, 50 bar CO, 120°C, 22 h.

<sup>b</sup> Yields of the experiments were determined by GC.

**Table S7. Investigation of the temperature effect.**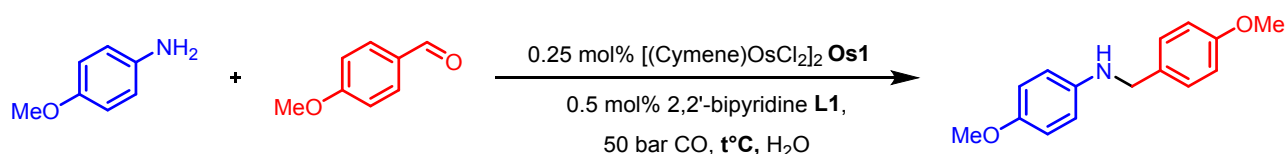

| Entry <sup>a</sup> | temperature, °C | Yield <sup>b</sup> , % |
|--------------------|-----------------|------------------------|
| 1                  | 60              | Traces                 |
| 2                  | 80              | Traces                 |
| 3                  | 100             | 27                     |
| 4                  | 120             | 81                     |
| 5                  | 140             | 88                     |
| 6                  | 160             | 74                     |
| 7                  | 180             | 41                     |
| 8                  | 200             | 15                     |

<sup>a</sup>Osmium catalyst **Os1** 0.8 mg (1.0  $\mu\text{mol}$ ), 2,2'-bipyridine **L1** 0.32 mg (2.0  $\mu\text{mol}$ ), 98.8 mg (0.8 mmol) 4-methoxyaniline, 48.8  $\mu\text{L}$  (0.4 mmol) 4-methoxybenzaldehyde, 400  $\mu\text{L}$  of  $\text{H}_2\text{O}$ , 50 bar CO, corresponding temperature, 22 h.

<sup>b</sup> Yields of the experiments were determined by GC.

**Table S8. Screening of solvents.**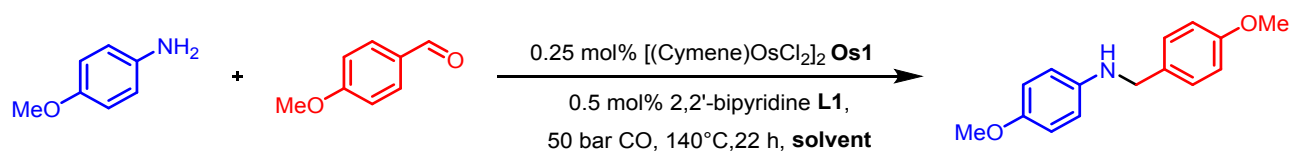

| Entry <sup>a</sup> | Solvent                                     | Yield <sup>c</sup> , % |
|--------------------|---------------------------------------------|------------------------|
| 1                  | THF (20 ppm H <sub>2</sub> O)               | 12                     |
| 2                  | Et <sub>2</sub> O (20 ppm H <sub>2</sub> O) | 11                     |
| 3                  | MeCN (20 ppm H <sub>2</sub> O)              | 10                     |
| 4                  | Dioxane (20 ppm H <sub>2</sub> O)           | 7                      |
| 5                  | EtOAc (0.1% H <sub>2</sub> O)               | 25                     |
| 6                  | t-BuOMe (0.5% H <sub>2</sub> O)             | 10                     |
| 7                  | H <sub>2</sub> O                            | 88                     |
| 8                  | PhCH <sub>3</sub> (0.03% H <sub>2</sub> O)  | 15                     |
| 9 <sup>b</sup>     | MeOH (0.0096% H <sub>2</sub> O)             | 65                     |
| 10 <sup>b</sup>    | MeOH (0.014% H <sub>2</sub> O)              | 62                     |
| 11 <sup>b</sup>    | EtOH (1.4% H <sub>2</sub> O)                | 67                     |
| 12 <sup>b</sup>    | EtOH (4.86% H <sub>2</sub> O)               | 62                     |
| 13 <sup>b</sup>    | i-PrOH (0.0092% H <sub>2</sub> O)           | 41                     |
| 14 <sup>b</sup>    | i-PrOH (0.1% H <sub>2</sub> O)              | 31                     |
| 15                 | t-BuOH (0.1% H <sub>2</sub> O)              | 16                     |

<sup>a</sup>Osmium catalyst **Os1** 0.8 mg (1.0 μmol), 2,2'-bipyridine **L1** 0.32 mg (2.0 μmol), 98.8 mg (0.8 mmol) 4-methoxyaniline, 48.8 μL (0.4 mmol) 4-methoxybenzaldehyde, 400 μL of corresponding solvent, 50 bar CO, 140°C, 22 h.

<sup>b</sup>The proportion of water was measured by Fischer titration.

<sup>c</sup>Yields of the experiments were determined by GC.

**Table S9. Assessment of ethanol as a cosolvent**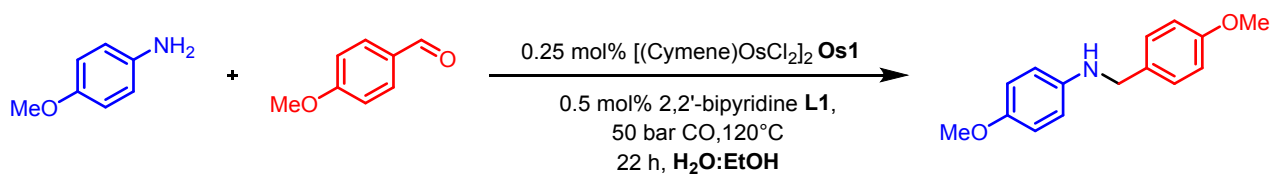

| Entry <sup>a</sup> | H <sub>2</sub> O:EtOH | Yield <sup>b</sup> , % |
|--------------------|-----------------------|------------------------|
| 1                  | 80:20                 | 96                     |
| 2                  | 20:80                 | 94                     |
| 3                  | 50:50                 | 86                     |
| 4                  | 100:0                 | 81                     |

<sup>a</sup>Osmium catalyst **Os1** 0.8 mg (1.0 μmol), 2,2'-bipyridine **L1** 0.32 mg (2.0 μmol), 98.8 mg (0.8 mmol) 4-methoxyaniline, 48.8 μL (0.4 mmol) 4-methoxybenzaldehyde, 400 μL of H<sub>2</sub>O-EtOH mixtures, 50 bar CO, 140°C, 22 h.

<sup>b</sup>Yields of the experiments were determined by GC.



**Table S10. Investigation of pressure influence on the Os-catalyzed alkylation.**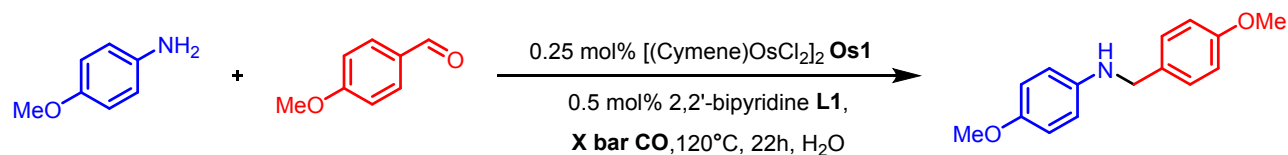

| Entry <sup>a</sup> | Pressure, bar | Yield <sup>b</sup> , % |
|--------------------|---------------|------------------------|
| 1                  | 5             | Traces                 |
| 2                  | 10            | 13                     |
| 3                  | 30            | 36                     |
| 4                  | 50            | 81                     |

<sup>a</sup>Osmium catalyst **Os1** 0.8 mg (1.0 μmol), 2,2'-bipyridine **L1** 0.32 mg (2.0 μmol), 98.8 mg (0.8 mmol) 4-methoxyaniline, 48.8 μL (0.4 mmol) 4-methoxybenzaldehyde, 400 μL of H<sub>2</sub>O, corresponding pressure, 120°C, 22 h.

<sup>b</sup>Yields of the experiments were determined by GC.

**Table S11. Effect of the stoichiometric ratio of reagents.**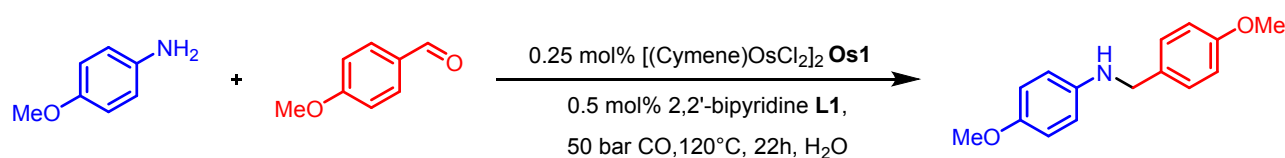

| Entry <sup>a</sup> | 4-methoxyaniline, eq. | Yield <sup>c</sup> , % |
|--------------------|-----------------------|------------------------|
| 1 <sup>b</sup>     | 0.5                   | 66                     |
| 2                  | 1                     | 78                     |
| 3                  | 2                     | 81                     |

<sup>a</sup>Osmium catalyst **Os1** 0.8 mg (1.0 μmol), 2,2'-bipyridine **L1** 0.32 mg (2.0 μmol), 24.7-98.8 mg (0.2-0.8 mmol) 4-methoxyaniline, 48.8 μL (0.4 mmol) 4-methoxybenzaldehyde, 400 μL of H<sub>2</sub>O, 50 bar CO, 120°C, 22 h.

<sup>b</sup>The yield was calculated relative to 4-methoxyaniline.

<sup>c</sup>Yields of the experiments were determined by GC.

**Table S12. Investigation of the catalysts' loading**

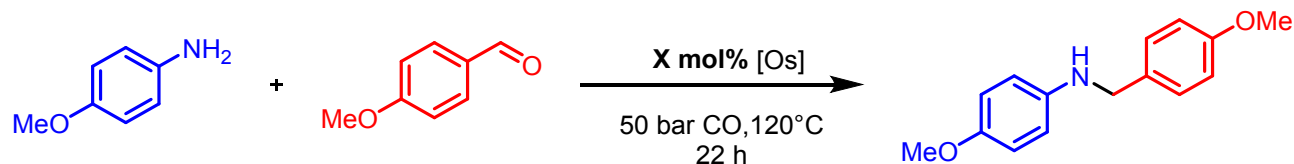

| Entry | [Os] Loading, mol% | Na <sub>2</sub> OsCl <sub>6</sub> + BiPy L1 <sup>a</sup> , % | Os1+ BiPy L1 <sup>b</sup> , % | Os2+BiPy L1 <sup>a</sup> , % | Os3 <sup>c</sup> , % | Os3 + BiPy L1 <sup>a</sup> , % | Os3 140°C <sup>d</sup> , % | Os4 <sup>c</sup> , % | Os7 <sup>c</sup> , % | Os8 <sup>c</sup> , % | Os9 <sup>c</sup> , % | Os9+ BiPy L1 <sup>a</sup> , % |
|-------|--------------------|--------------------------------------------------------------|-------------------------------|------------------------------|----------------------|--------------------------------|----------------------------|----------------------|----------------------|----------------------|----------------------|-------------------------------|
| 1     | 0,5                | 89                                                           | 88                            | 99                           | 94                   | -                              | -                          | 84                   | 81                   | 99                   | 0                    | 5                             |
| 2     | 0,25               | 76                                                           | 44                            | 97                           | 86                   | -                              | -                          | 79                   | 72                   | 98                   | 0                    | -                             |
| 3     | 0,125              | 64                                                           | 34                            | 78                           | 23                   | 52                             | 58                         | 61                   | 6                    | 6                    | 0                    | -                             |
| 4     | 0,0625             | 30                                                           | 26                            | 54                           | 12                   | -                              | -                          | 18                   | 25                   | 6                    | 0                    | -                             |

<sup>a</sup>98.8 mg (0.8 mmol) 4-methoxyaniline, 48.8μL (0.4 mmol) 4-methoxybenzaldehyde, 0.5-0.0625 mol% of catalyst, 1.5 mol% of 2,2'-bipyridine 0.96 mg (6.0 μmol), 400 μL of H<sub>2</sub>O, 50 bar CO, 120°C, 22 h . Yields of the experiments were determined by GC.

<sup>b</sup>98.8 mg (0.8 mmol) 4-methoxyaniline, 48.8μL (0.4 mmol) 4-methoxybenzaldehyde, **320 μL H<sub>2</sub>O 80 μLEtOH**, 0.25-0.03125mol% % of catalyst, **1.5 mol% of 2,2'-bipyridine L1**., Yields of the experiments were determined by GC.

<sup>c</sup>98.8 mg (0.8 mmol) 4-methoxyaniline, 48.8μL (0.4 mmol) 4-methoxybenzaldehyde, 0.5-0.0625 mol% of catalyst, 400 μL of H<sub>2</sub>O, 50 bar CO, 120°C, 22 h.Yields of the experiments were determined by GC.

<sup>d</sup>98.8 mg (0.8 mmol) 4-methoxyaniline, 48.8μL (0.4 mmol) 4-methoxybenzaldehyde, 400 μL H<sub>2</sub>O, 0.5-0.0625 mol% of catalyst, **140°C**, Yields of the experiments were determined by GC.

«-» - Experiment was not conducted.

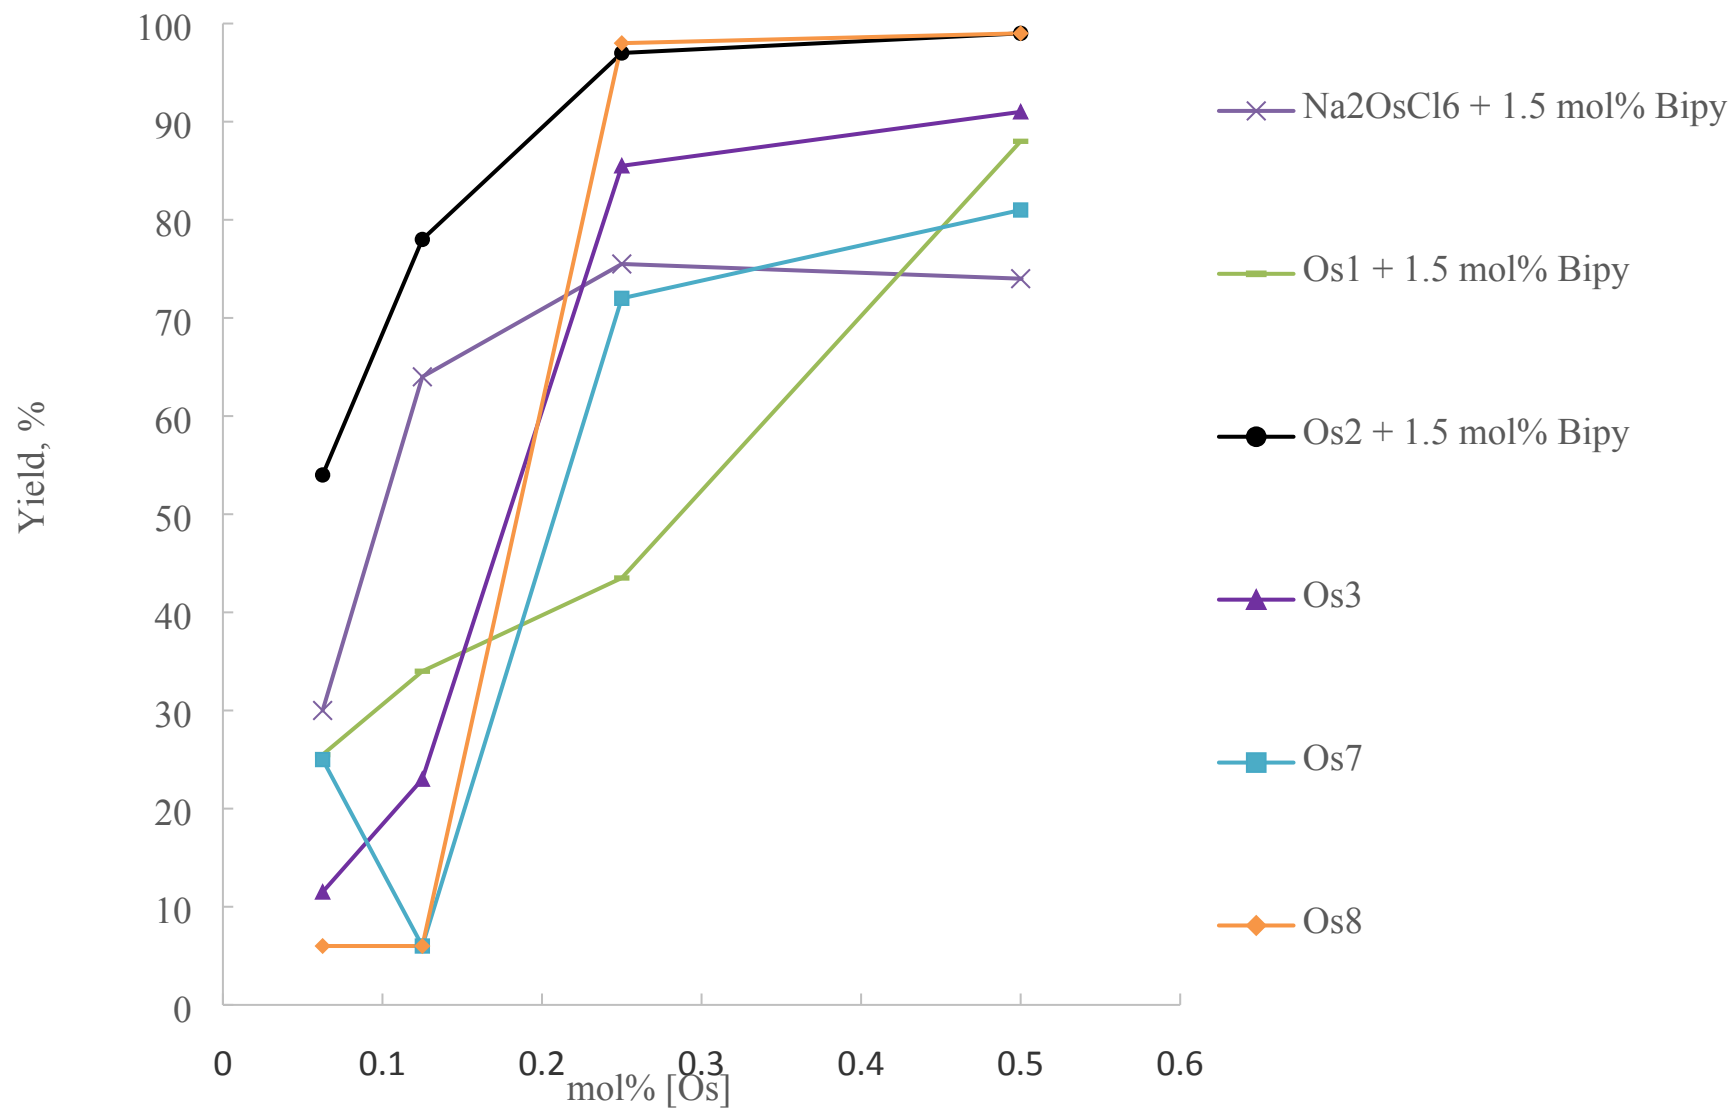

Finally, optimal conditions are:

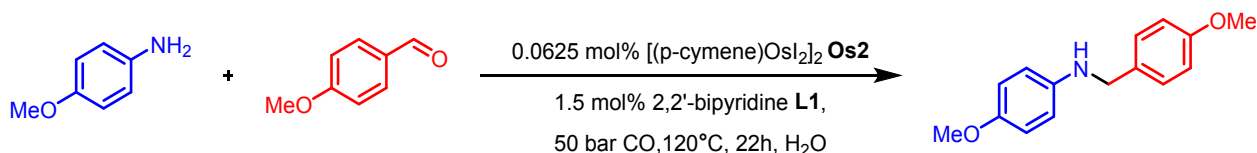

**Os2** (0.0625 – 0.25 mol%), 1.5 mol% 2,2'-bipyridine **L1**, 2 equiv. of amine, H<sub>2</sub>O, 50 bar CO, 120°C, 22 h.

**Os2** was selected as the benchmark catalyst due to its low cost and relative simplicity. Moreover, the reaction requires minimal loading of this catalyst. Thus, this catalyst represents the optimal combination of catalytic activity and cost.

Other active catalytic systems are listed in the table below along with their price and optimal conditions for catalysis. The prices were calculated on the basis of Sigma Aldrich catalogue.

**Table S13. Comparison of the working catalytic systems.**

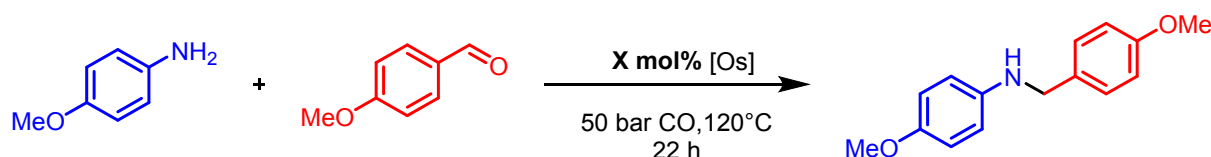

| Entry | Osmium source                     | Additive                 | Minimal [Os] loading required for preparative yield | Number of steps for the osmium precursor preparation | Additive/Ligand cost, EUR for 1 g | Yield at the standard conditions using the mentioned catalytic osmium loading, % |
|-------|-----------------------------------|--------------------------|-----------------------------------------------------|------------------------------------------------------|-----------------------------------|----------------------------------------------------------------------------------|
| 1     | Na <sub>2</sub> OsCl <sub>6</sub> | Bipy <b>L1</b> 1.5 mol%  | 0.125 mol%                                          | 0                                                    | 11 EUR/g                          | 64                                                                               |
| 2     | Na <sub>2</sub> OsCl <sub>6</sub> | BPhen <b>L3</b> 1.5 mol% | 0.5 mol%                                            | 0                                                    | 549 EUR/g                         | 99                                                                               |
| 3     | <b>Os1</b>                        | Bipy <b>L1</b> 1.5 mol%  | 0.5 mol% (H <sub>2</sub> O:EtOH 4:1)                | 1                                                    | 11 EUR/g                          | 88                                                                               |
| 4     | <b>Os1</b>                        | BPhen <b>L3</b> 1.5 mol% | 0.125 mol% with 0.3725 mol% Bphen                   | 1                                                    | 549 EUR/g                         | 85                                                                               |
| 5     | <b>Os2</b>                        | Bipy <b>L1</b> 1.5 mol%  | 0.0625 mol%                                         | 2                                                    | 11 EUR/g                          | 54                                                                               |
| 6     | <b>Os7</b>                        | -                        | 0.25 mol%                                           | 1                                                    | 11 EUR/g                          | 72                                                                               |
| 7     | <b>Os8</b>                        | -                        | 0.25 mol%                                           | 1                                                    | 549 EUR/g                         | 98                                                                               |
| 8     | <b>Os3</b>                        | 1.5 mol% Bipy <b>L1</b>  | 0.125 mol%                                          | 2                                                    | 11 EUR/g                          | 52                                                                               |
| 9     | <b>Os3</b>                        | -                        | 0.125 mol%, 140°C                                   | 2                                                    | 11 EUR/g                          | 58                                                                               |
| 10    | <b>Os4</b>                        | -                        | 0.125                                               | 2                                                    | 549 EUR/g                         | 61                                                                               |
| 11    | <b>Os6</b>                        | -                        | 0.5                                                 | 2                                                    | 549 EUR/g                         | 80                                                                               |



## 4. Mechanistic investigations

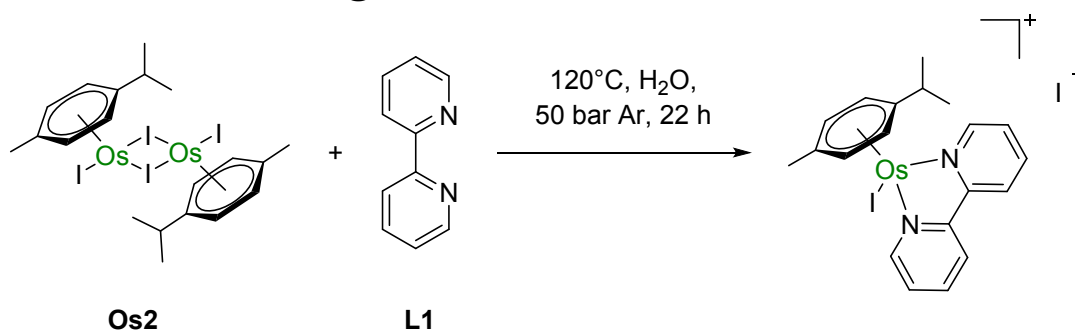

A glass vial in a 10 mL titanium autoclave was charged with catalyst **Os2** (5.2 mg, 4.5  $\mu\text{mol}$ , 50 mol%), 2,2'-bipyridine (1.4 mg, 9.0  $\mu\text{mol}$ , 100 mol%) and water (100  $\mu\text{L}$ ). The autoclave was sealed, flushed three times with 10 bar of Ar, and then charged with Ar (50 bar). The reactor was placed into a preheated to 120°C oil bath for 18 h. After the indicated time, the reactor was cooled to room temperature and depressurized. The reaction mixture was analyzed by NMR and LCMS. The main component is CymeneOsBiPyI<sub>2</sub>.

**Reaction mixture** <sup>1</sup>H NMR (400 MHz, CD<sub>3</sub>OD, signal of water was suppressed)

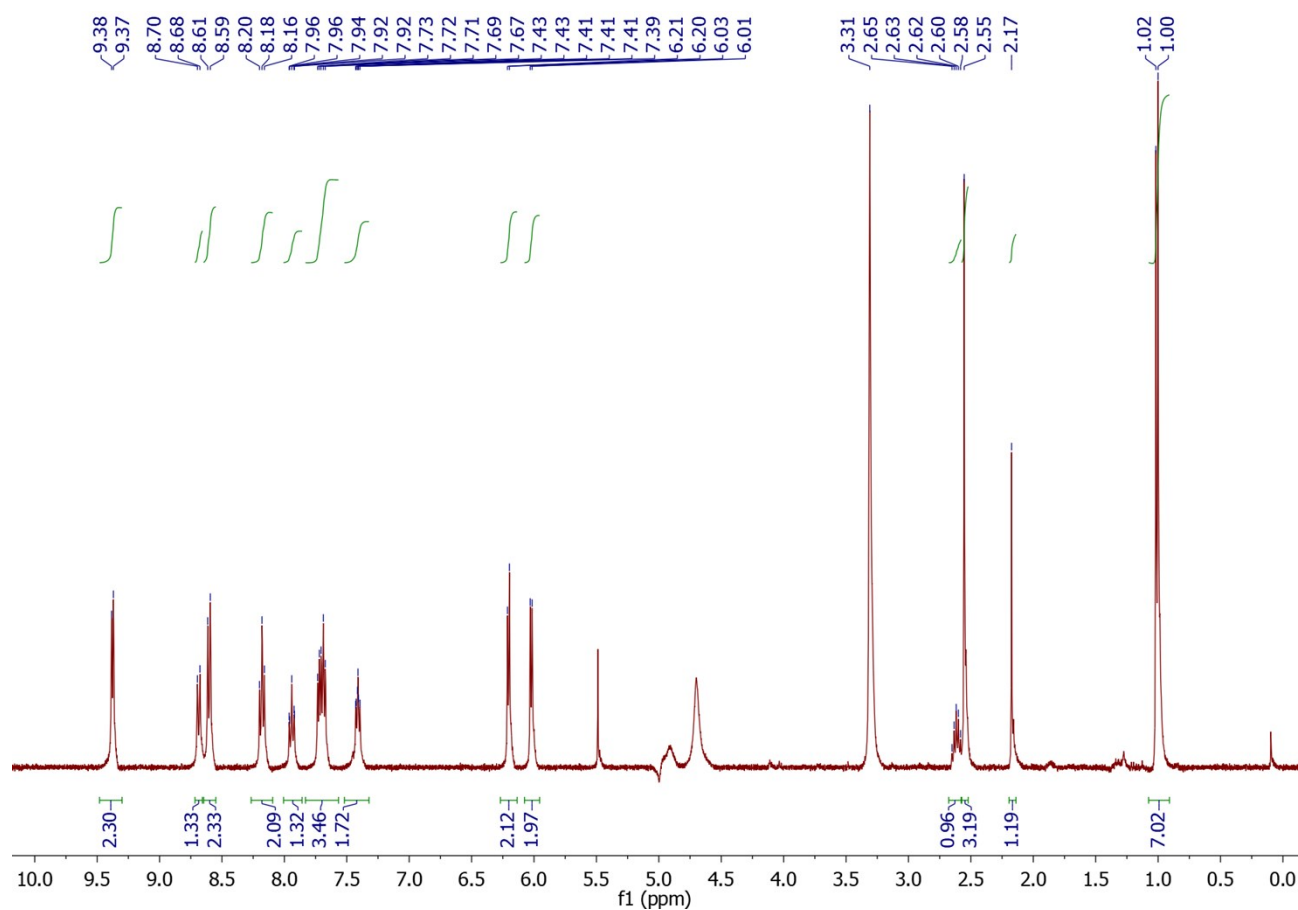

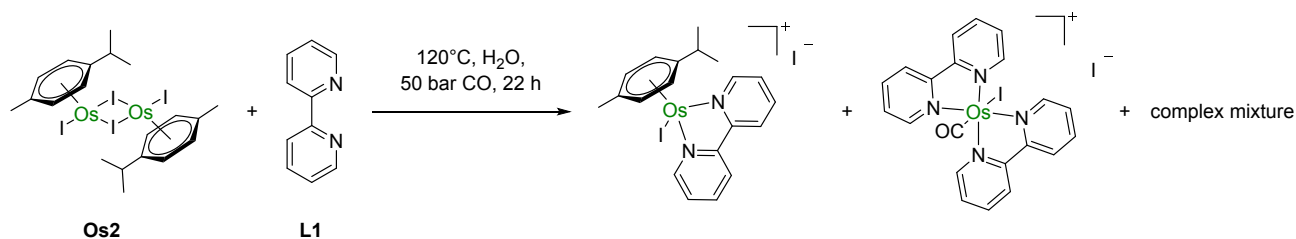

A glass vial in a 10 mL titanium autoclave was charged with catalyst **Os2** (5.2 mg, 4.5  $\mu\text{mol}$ , 50 mol%), 2,2'-bipyridine (1.4 mg, 9.0  $\mu\text{mol}$ , 100 mol%) and water (100  $\mu\text{L}$ ). The autoclave was sealed, flushed three times with 10 bar of CO, and then charged with CO (50 bar). The reactor was placed into a preheated to 120°C oil bath for 18 h. After the indicated time, the reactor was cooled to room temperature and depressurized. The reaction mixture was analyzed by NMR and LCMS. The main component is CymeneOsBiPyI<sub>2</sub>, and (BiPy)<sub>2</sub>OsCOI<sub>2</sub> was identified by MS.

**Reaction mixture** <sup>1</sup>H NMR (400 MHz, CD<sub>3</sub>OD, signal of water was suppressed)

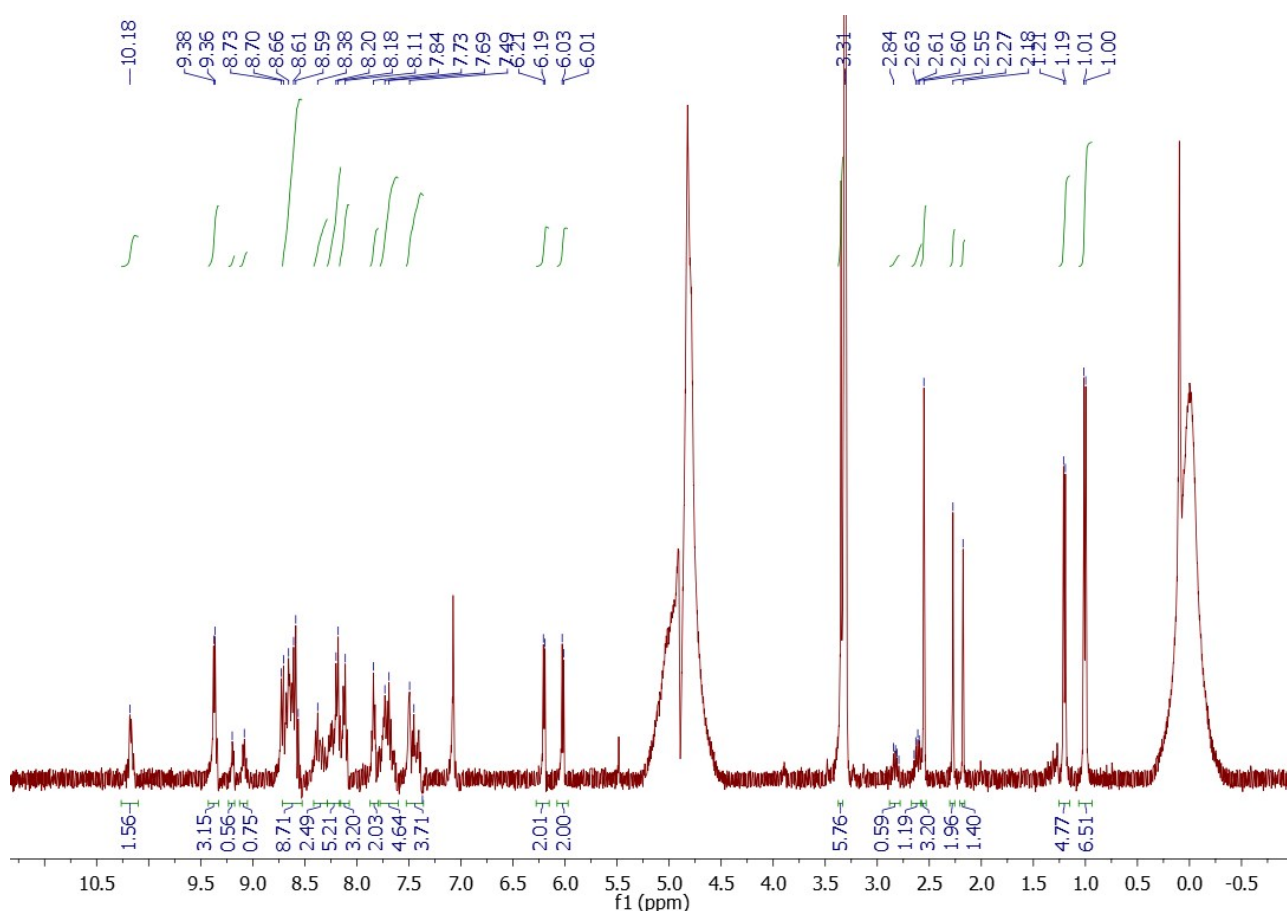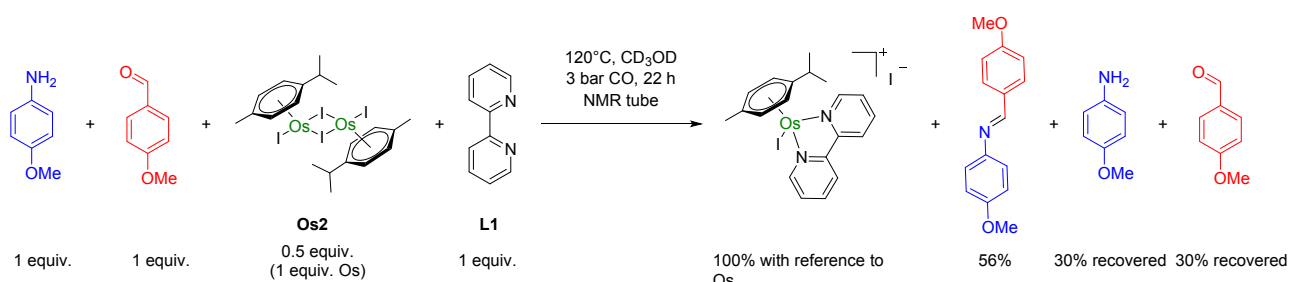

A high pressure NMR tube was charged with catalyst **Os2** (10 mg, 8.7  $\mu\text{mol}$ , 50 mol%), 2,2'-bipyridine (2.7 mg, 17  $\mu\text{mol}$ , 100 mol%), 4-methoxyaniline (2.1 mg, 100 mol %, 17  $\mu\text{mol}$ ), 4-methoxybenzaldehyde (2.1  $\mu\text{L}$ , 100 mol%, 17  $\mu\text{mol}$ ) and CD<sub>3</sub>OD (400  $\mu\text{L}$ ). The tube was sealed,

flushed three times with 3 bar of CO, and then charged with CO (3 bar). The tube was placed into a preheated to 120°C oil bath for 16 h. After the indicated time, the tube was cooled to room temperature and the reaction mixture was analyzed by NMR.

### Reaction mixture <sup>1</sup>H NMR (400 MHz, CD<sub>3</sub>OD)

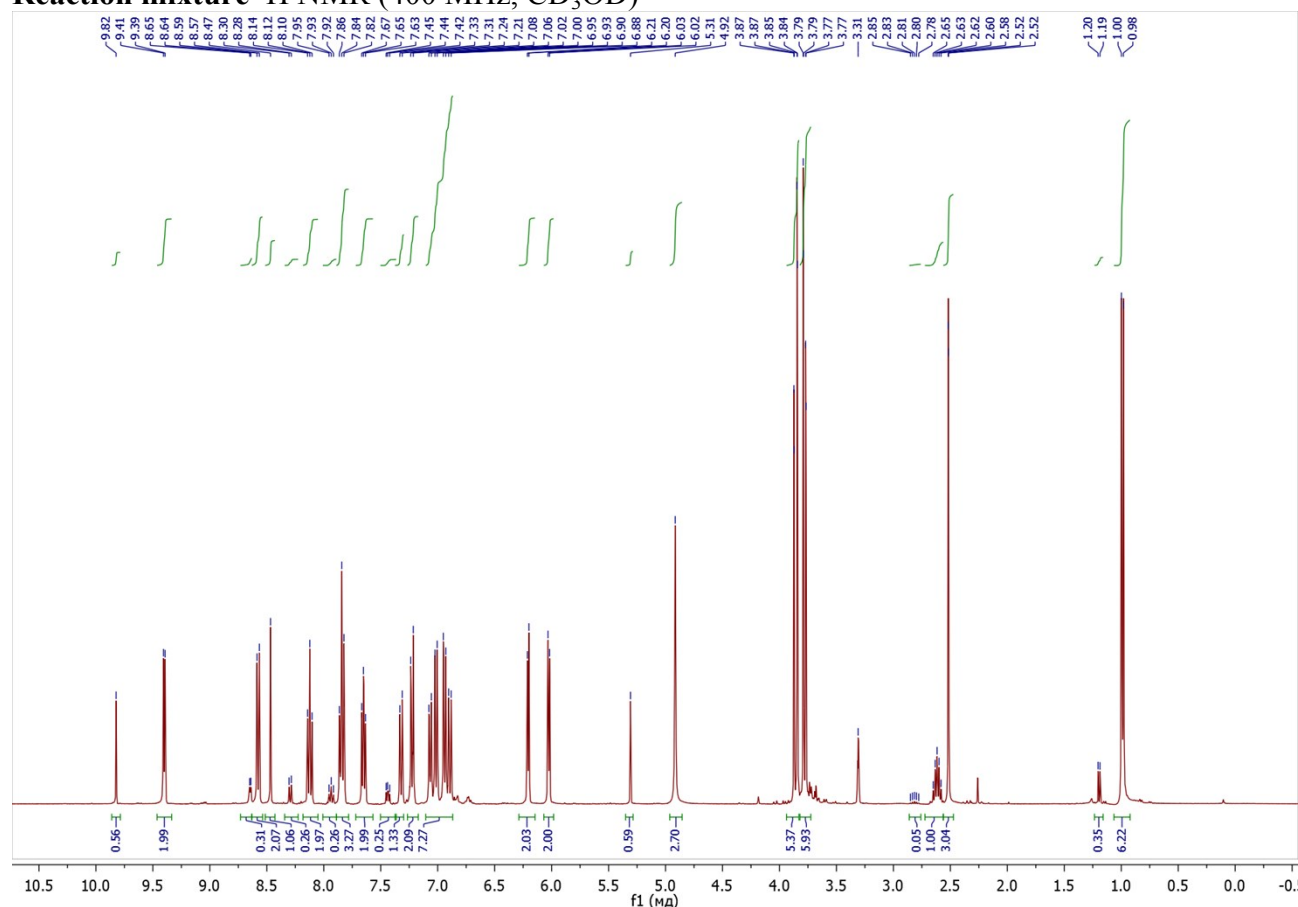

### Hydrogenation under the developed reaction conditions

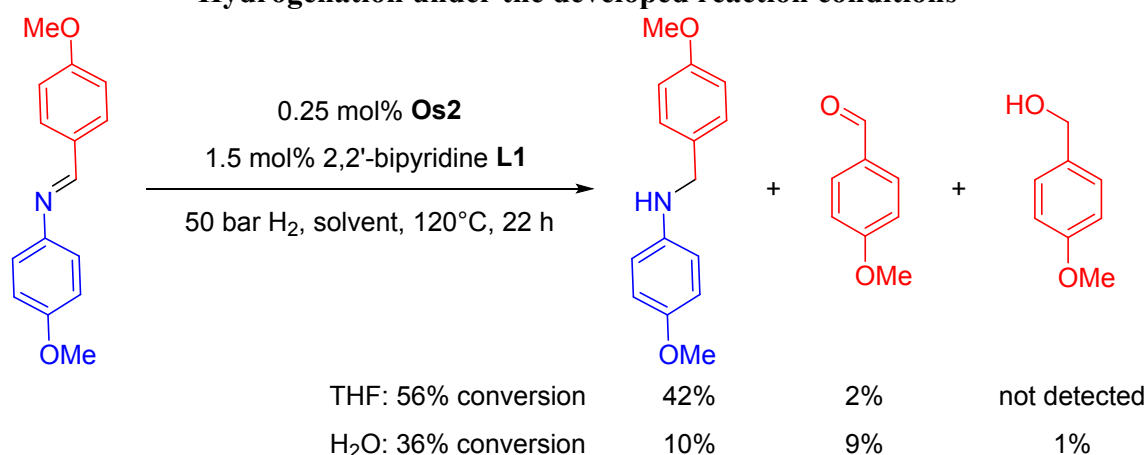

A glass vial in a 10 mL titanium autoclave was charged with catalyst **Os2** (1.16 mg, 1.0 μmol, 0.25 mol%), 2,2'-bipyridine (0.96 mg, 6.0 μmol, 1.5 mol%), N,1-bis(4-methoxyphenyl)methanimine (96.8 mg, 100 mol %, 0.4 mmol), water or THF (400 μL). The autoclave was sealed, flushed three times with 10 bar of H<sub>2</sub>, and then charged with H<sub>2</sub> (50 bar). The reactor was placed into a preheated to 120°C oil bath for 22 h. After the indicated time, the reactor was cooled to room temperature and depressurized. The reaction mixture was transferred into a measuring flask and diluted with dichloromethane to 5 mL, 1 ml aliquot was analyzed by NMR.



## 5. Synthesis and characterization of the RA products

### 4-methoxy-N-(4-methoxybenzyl)aniline (1)

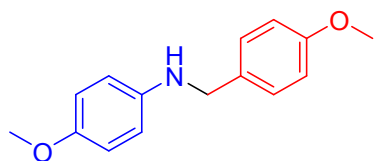

A glass vial in a 10 mL titanium autoclave was charged with catalyst **Os2** (1.16 mg, 1.0  $\mu\text{mol}$ , 0.25 mol%), 2,2'-bipyridine (0.96 mg, 6.0  $\mu\text{mol}$ , 1.5 mol%), 4-methoxyaniline (98.8 mg, 200 mol %, 0.8 mmol), water (400  $\mu\text{L}$ ) and 4-methoxybenzaldehyde (48.8  $\mu\text{L}$ , 100 mol%, 0.4 mmol). The autoclave was sealed, flushed three times with 10 bar of CO, and then charged with CO (50 bar). The reactor was placed into a preheated to 120°C oil bath for 22 h. After the indicated time, the reactor was cooled to room temperature and depressurized. The reaction mixture was transferred into a measuring flask and diluted with dichloromethane to 5 mL, 1 ml aliquot was analyzed by NMR. 93% NMR yield. Purification: DCM fraction was washed with water, after that solvent was removed under reduced pressure and the residue was purified using column chromatography using InterChim PuriFlash chromatograph in hexane-ethyl acetate gradient system ( $R_f=0.5$  hexane/ethyl acetate/trimethylamine = 4/1/0.05). Isolated as a white solid - 93% (90.9 mg).

$^1\text{H}$  NMR (300 MHz,  $\text{CDCl}_3$ )  $\delta$  7.30 (d,  $J = 8.7$  Hz, 2H, ArH), 6.88 (d,  $J = 8.7$  Hz, 2H, ArH), 6.79 (d,  $J = 8.9$  Hz, 2H, ArH), 6.61 (d,  $J = 8.9$  Hz, 2H, ArH), 4.21 (s, 2H,  $\text{NCH}_2$ ), 3.81 (s, 3H,  $\text{OCH}_3$ ), 3.75 (s, 3H,  $\text{OCH}_3$ ).

$^{13}\text{C}$  NMR (101 MHz,  $\text{CDCl}_3$ )  $\delta$  158.9 ( $\text{C}_{\text{Ar-O}}$ ), 152.2 ( $\text{C}_{\text{Ar-O}}$ ), 142.6 ( $\text{C}_{\text{Ar-N}}$ ), 131.8 ( $\text{C}_{\text{Ar-CH}_2}$ ), 128.9 ( $\text{C}_{\text{Ar}}$ ), 115.0 ( $\text{C}_{\text{Ar}}$ ), 114.2 ( $\text{C}_{\text{Ar}}$ ), 114.06 ( $\text{C}_{\text{Ar}}$ ), 55.9 ( $\text{OCH}_3$ ), 55.4 ( $\text{OCH}_3$ ), 48.8 ( $\text{NCH}_2$ ).

The obtained NMR data are in agreement with the literature report.<sup>4</sup>

### 4-methoxy-N-(3-methoxybenzyl)aniline (2)

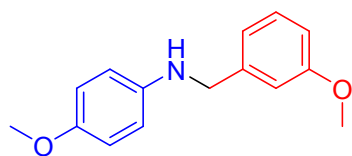

A glass vial in a 10 mL titanium autoclave was charged with catalyst **Os2** (1.16 mg, 1.0  $\mu\text{mol}$ , 0.25 mol%), 2,2'-bipyridine (0.96 mg, 6.0  $\mu\text{mol}$ , 1.5 mol%), 4-methoxyaniline (98.8 mg, 200 mol %, 0.8 mmol), water (400  $\mu\text{L}$ ) and 3-methoxybenzaldehyde (49  $\mu\text{L}$ , 100 mol%, 0.4 mmol). The autoclave was sealed, flushed three times with 10 bar of CO, and then charged with CO (50 bar). The reactor was placed into a preheated to 120°C oil bath for 22 h. After the indicated time, the reactor was cooled to room temperature and depressurized. The reaction mixture was transferred into a measuring flask and diluted with dichloromethane to 5 mL, 1 ml aliquot was analyzed by NMR. 86% NMR yield. Purification: DCM fraction was washed with water, after that solvent was removed under reduced pressure and the residue was purified using column chromatography, eluent hexane/ethyl acetate/triethylamine 10/1/0.1 ( $R_f = 0.11$ ). Isolated as a yellow oil - 71% (69.6 mg).

$^1\text{H}$  NMR (300 MHz,  $\text{CDCl}_3$ )  $\delta$  7.32 – 7.21 (m, 1H, ArH), 7.05 – 6.90 (m, 2H, ArH), 6.89 – 6.71 (m, 3H, ArH), 6.62 (d,  $J$  = 8.9 Hz, 2H, ArH), 4.27 (s, 2H,  $\text{NCH}_2$ ), 3.81 (s, 3H,  $\text{OCH}_3$ ), 3.76 (s, 3H,  $\text{OCH}_3$ ).

$^{13}\text{C}$  NMR (75 MHz,  $\text{CDCl}_3$ )  $\delta$  160.0 ( $\text{C}_{\text{Ar-O}}$ ), 152.3 ( $\text{C}_{\text{Ar-O}}$ ), 142.5 ( $\text{C}_{\text{Ar-N}}$ ), 141.5 ( $\text{C}_{\text{Ar-C}}$ ), 129.7 ( $\text{C}_{\text{Ar}}$ ), 119.9 ( $\text{C}_{\text{Ar}}$ ), 115.0 ( $\text{C}_{\text{Ar}}$ ), 114.2 ( $\text{C}_{\text{Ar}}$ ), 113.1 ( $\text{C}_{\text{Ar}}$ ), 112.7 ( $\text{C}_{\text{Ar}}$ ), 55.9 ( $\text{OCH}_3$ ), 55.3 ( $\text{OCH}_3$ ), 49.3 ( $\text{NCH}_2$ ).

The obtained NMR data are in agreement with the literature report.<sup>4</sup>

#### 4-methoxy-N-(2-methoxybenzyl)aniline (3)

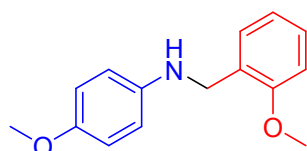

A glass vial in a 10 mL titanium autoclave was charged with catalyst **Os2** (1.16 mg, 1.0  $\mu\text{mol}$ , 0.25 mol%), 2,2'-bipyridine (0.96 mg, 6.0  $\mu\text{mol}$ , 1.5 mol%), 4-methoxyaniline (98.8 mg, 200 mol %, 0.8 mmol) water (400  $\mu\text{L}$ ) and 2-methoxybenzaldehyde (48.6  $\mu\text{L}$ , 100 mol%, 0.4 mmol). The autoclave was sealed, flushed three times with 10 bar of  $\text{CO}$ , and then charged with  $\text{CO}$  (50 bar). The reactor was placed into a preheated to 140°C oil bath for 22 h. After the indicated time, the reactor was cooled to room temperature and depressurized. The reaction mixture was transferred into a measuring flask and diluted with dichloromethane to 5 mL, 1 ml aliquot was analyzed by NMR. 86% NMR yield. Purification: DCM fraction was washed with water, after that solvent was removed under reduced pressure and the residue was purified using column chromatography, eluent hexane/ethyl acetate/triethylamine 10/1/0.1 ( $R_f$  = 0.11). Isolated as a yellow oil - 80% (77.7 mg).

$^1\text{H}$  NMR (300 MHz,  $\text{CDCl}_3$ )  $\delta$  7.32 (d,  $J$  = 7.4 Hz, 1H, ArH), 7.26 (t,  $J$  = 7.7 Hz, 1H, ArH), 6.98 – 6.95 (m, 2H, ArH), 6.79 (d,  $J$  = 8.9 Hz, 2H, ArH), 6.64 (d,  $J$  = 8.9 Hz, 2H, ArH), 4.30 (s, 2H,  $\text{NCH}_2$ ), 3.87 (s, 3H,  $\text{OCH}_3$ ), 3.75 (s, 3H,  $\text{OCH}_3$ ).

$^{13}\text{C}$  NMR (101 MHz,  $\text{CDCl}_3$ )  $\delta$  157.5 ( $\text{C}_{\text{Ar-O}}$ ), 152.2 ( $\text{C}_{\text{Ar-O}}$ ), 142.8 ( $\text{C}_{\text{Ar-N}}$ ), 129.1 ( $\text{C}_{\text{Ar}}$ ), 128.4 ( $\text{C}_{\text{Ar}}$ ), 127.7 ( $\text{C}_{\text{Ar-CH}_2}$ ), 120.6 ( $\text{C}_{\text{Ar}}$ ), 114.9 ( $\text{C}_{\text{Ar}}$ ), 114.54 ( $\text{C}_{\text{Ar}}$ ), 110.3 ( $\text{C}_{\text{Ar}}$ ), 55.9 ( $\text{OCH}_3$ ), 55.4 ( $\text{OCH}_3$ ), 44.6 ( $\text{NCH}_2$ ).

The obtained NMR data are in an agreement with literature data.<sup>4</sup>

#### N-(4-chlorobenzyl)-4-methoxyaniline (4)

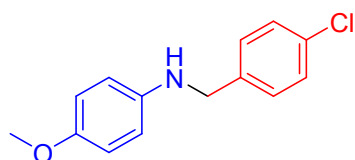

A glass vial in a 10 mL titanium autoclave was charged with catalyst **Os2** (1.16 mg, 1.0  $\mu\text{mol}$ , 0.25 mol%), 2,2'-bipyridine (0.96 mg, 6.0  $\mu\text{mol}$ , 1.5 mol%), 4-methoxyaniline (98.8 mg, 200 mol %, 0.8 mmol) 4-chlorobenzaldehyde (56.4 mg, 100 mol%, 0.4 mmol) and water (400  $\mu\text{L}$ ). The autoclave was sealed, flushed three times with 10 bar of  $\text{CO}$ , and then charged with  $\text{CO}$  (50 bar). The reactor was placed into a preheated to 160°C oil bath for 22 h. After the indicated time, the reactor was cooled

to room temperature and depressurized. The reaction mixture was transferred into a measuring flask and diluted with dichloromethane to 5 mL, 1 ml aliquot was analyzed by NMR. 80% NMR yield. Purification: DCM fraction was washed with water, after that solvent was removed under reduced pressure and the residue was purified using column chromatography, eluent: hexane/ethyl acetate/triethylamine 20/1/0.1 ( $R_f = 0.11$ ) to hexane/ethyl acetate/triethylamine 10/1/0.1 ( $R_f = 0.2$ ). Isolated as a yellow oil. Isolated as a yellow oil - 70% (69 mg).

$^1\text{H}$  NMR (300 MHz,  $\text{CDCl}_3$ )  $\delta$  7.31 (s, 4H, Cl-ArH), 6.79 (d,  $J = 8.9$  Hz, 2H, ArH), 6.59 (d,  $J = 8.9$  Hz, 2H, ArH), 4.27 (s, 2H,  $\text{NCH}_2$ ), 3.75 (s, 3H,  $\text{OCH}_3$ ).

$^{13}\text{C}$  NMR (101 MHz,  $\text{CDCl}_3$ )  $\delta$  152.4 ( $\text{C}_{\text{Ar-O}}$ ), 142.1 ( $\text{C}_{\text{Ar-N}}$ ), 138.4 ( $\text{C}_{\text{Ar-C}}$ ), 132.8 ( $\text{C}_{\text{Ar-Cl}}$ ), 128.83 ( $\text{C}_{\text{Ar}}$ ), 128.78 ( $\text{C}_{\text{Ar}}$ ), 115.0 ( $\text{C}_{\text{Ar}}$ ), 114.2 ( $\text{C}_{\text{Ar}}$ ), 55.9 ( $\text{OCH}_3$ ), 48.6 ( $\text{NCH}_2$ ).

The obtained NMR data are in agreement with the literature report.<sup>5</sup>

### N-(3-chlorobenzyl)-4-methoxyaniline (5)

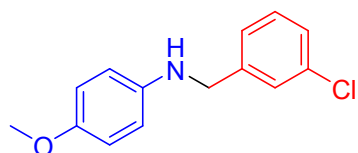

A glass vial in a 10 mL titanium autoclave was charged with catalyst **Os2** (1.16 mg, 1.0  $\mu\text{mol}$ , 0.25 mol%), 2,2'-bipyridine (0.96 mg, 6.0  $\mu\text{mol}$ , 1.5 mol%), 4-methoxyaniline (98.8 mg, 200 mol %, 0.8 mmol), water (400  $\mu\text{L}$ ) and 3-chlorobenzaldehyde (45.2  $\mu\text{L}$ , 100 mol%, 0.4 mmol). The autoclave was sealed, flushed three times with 10 bar of  $\text{CO}$ , and then charged with  $\text{CO}$  (50 bar). The reactor was placed into a preheated to 160°C oil bath for 22 h. After the indicated time, the reactor was cooled to room temperature and depressurized. The reaction mixture was transferred into a measuring flask and diluted with dichloromethane to 5 mL, 1 ml aliquot was analyzed by NMR. 78% NMR yield. Purification: DCM fraction was washed with water, after that solvent was removed under reduced pressure and the residue was purified using column chromatography, eluent hexane/ethyl acetate/triethylamine 10/1/0.1 ( $R_f = 0.2$ ). Isolated as a yellow oil - 73% (72.5 mg).

$^1\text{H}$  NMR (400 MHz,  $\text{CDCl}_3$ )  $\delta$  7.39 (s, 1H, Cl-ArH), 7.26 (s, 3H, Cl-ArH), 6.79 (d,  $J = 7.0$  Hz, 2H, ArH), 6.59 (d,  $J = 7.0$  Hz, 2H, ArH), 4.28 (s, 2H,  $\text{NCH}_2$ ), 3.75 (s, 3H,  $\text{OCH}_3$ ).

$^{13}\text{C}$  NMR (101 MHz,  $\text{CDCl}_3$ )  $\delta$  152.4 ( $\text{C}_{\text{Ar-O}}$ ), 142.1 ( $\text{C}_{\text{Ar-N}}$ ), 134.6 ( $\text{C}_{\text{Ar-C}}$ ), 130.0 ( $\text{C}_{\text{Ar}}$ ), 127.6 ( $\text{C}_{\text{Ar}}$ ), 127.4 ( $\text{C}_{\text{Ar}}$ ), 125.6 ( $\text{C}_{\text{Ar}}$ ), 115.0 ( $\text{C}_{\text{Ar}}$ ), 114.2 ( $\text{C}_{\text{Ar}}$ ), 55.9 ( $\text{OCH}_3$ ), 48.7 ( $\text{NCH}_2$ ).

The obtained NMR data are in agreement with the literature report.<sup>6</sup>

### N-(4-(benzyloxy)benzyl)-4-methoxyaniline (6)

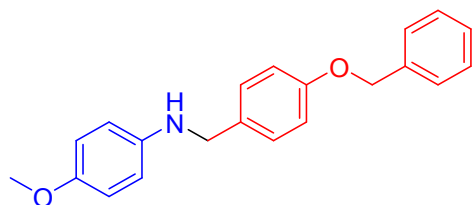

A glass vial in a 10 mL titanium autoclave was charged with catalyst **Os2** (1.16 mg, 1.0  $\mu\text{mol}$ , 0.25 mol%), 2,2'-bipyridine (0.96 mg, 6.0  $\mu\text{mol}$ , 1.5 mol%), 4-methoxyaniline (98.8 mg, 200 mol %, 0.8 mmol), 4-(benzyloxy)benzaldehyde (84.9 mg, 100 mol%, 0.4 mmol) and water (400  $\mu\text{L}$ ). The autoclave was sealed, flushed three times with 10 bar of CO, and then charged with CO (50 bar). The reactor was placed into a preheated to 160°C oil bath for 22 h. After the indicated time, the reactor was cooled to room temperature and depressurized. The reaction mixture was transferred into a measuring flask and diluted with dichloromethane to 5 mL, 1 ml aliquot was analyzed by NMR. 68% NMR yield. Purification: DCM fraction was washed with water, after that solvent was removed under reduced pressure and the residue was purified using column chromatography using InterChim PuriFlash chromatograph in hexane-DCM gradient system ( $R_f=0.16$  DCM). Isolated as a yellowish solid - 56% (71.2 mg).

$^1\text{H}$  NMR (400 MHz,  $\text{CDCl}_3$ )  $\delta$  7.56 – 7.21 (m, 7H, ArH), 6.97 (d,  $J = 8.5$  Hz, 2H, ArH), 6.80 (d,  $J = 8.9$  Hz, 2H, ArH), 6.62 (d,  $J = 8.9$  Hz, 2H, ArH), 5.07 (s, 2H,  $\text{OCH}_2$ ), 4.22 (s, 2H,  $\text{NCH}_2$ ), 3.76 (s, 3H,  $\text{OCH}_3$ ).

$^{13}\text{C}$  NMR (101 MHz,  $\text{CDCl}_3$ )  $\delta$  158.1 ( $\text{C}_{\text{Ar-O}}$ ), 152.3 ( $\text{C}_{\text{Ar-O}}$ ), 142.6 ( $\text{C}_{\text{Ar-N}}$ ), 137.1 ( $\text{C}_{\text{Ar-C}}$ ), 132.1 ( $\text{C}_{\text{Ar-C}}$ ), 129.0 ( $\text{C}_{\text{Ar}}$ ), 128.7 ( $\text{C}_{\text{Ar}}$ ), 128.1 ( $\text{C}_{\text{Ar}}$ ), 127.6 ( $\text{C}_{\text{Ar}}$ ), 115.0 ( $\text{C}_{\text{Ar}}$ ), 115.0 ( $\text{C}_{\text{Ar}}$ ), 114.2 ( $\text{C}_{\text{Ar}}$ ), 70.1 ( $\text{OCH}_2$ ), 55.9 ( $\text{OCH}_3$ ), 48.8 ( $\text{NCH}_2$ ).

The obtained NMR data are in agreement with the literature report.<sup>4</sup>

#### **N-isopropyl-4-methoxyaniline (7)**

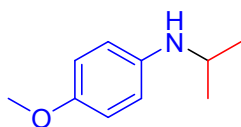

A glass vial in a 10 mL titanium autoclave was charged with catalyst **Os2** (2.32 mg, 2.0  $\mu\text{mol}$ , 0.25 mol%), 2,2'-bipyridine (1.92 mg, 12.0  $\mu\text{mol}$ , 1.5 mol%), 4-methoxyaniline (98.8 mg, 100 mol %, 0.8 mmol) water (800  $\mu\text{L}$ ), and acetone (1164  $\mu\text{L}$ , 2000 mol%, 16 mmol). The autoclave was sealed, flushed three times with 10 bar of CO, and then charged with CO (50 bar). The reactor was placed into a preheated to 160°C oil bath for 22 h. After the indicated time, the reactor was cooled to room temperature and depressurized. The reaction mixture was transferred into a measuring flask and diluted with dichloromethane to 5 mL, 1 ml aliquot was analyzed by NMR. 87% NMR yield. Purification: DCM fraction was washed with water, after that solvent was removed under reduced pressure and the residue was purified using column chromatography, eluent hexane/ethyl acetate/triethylamine 10/1/0.1 ( $R_f = 0.22$ ). Isolated as a yellow oil - 67% (88 mg).

$^1\text{H}$  NMR (400 MHz,  $\text{CDCl}_3$ )  $\delta$  6.79 (d,  $J = 8.9$  Hz, 2H, ArH), 6.58 (d,  $J = 8.9$  Hz, 2H, ArH), 3.75 (s, 3H,  $\text{OCH}_3$ ), 3.55 (sept,  $J = 6.3$  Hz, 1H,  $\underline{\text{CH}}(\text{CH}_3)_2$ ), 1.20 (d,  $J = 6.3$  Hz, 6H,  $\text{C}(\underline{\text{CH}_3})_2$ ).

$^{13}\text{C}$  NMR (101 MHz,  $\text{CDCl}_3$ )  $\delta$  152.0 ( $\text{C}_{\text{Ar-O}}$ ), 141.9 ( $\text{C}_{\text{Ar-N}}$ ), 115.0 (2C,  $\text{C}_{\text{Ar}}$ ), 55.9 ( $\text{OCH}_3$ ), 45.3 ( $\text{NCH}$ ), 23.2 ( $\text{CH}_3$ ).

The obtained NMR data are in agreement with the literature report<sup>7</sup>

### N-(4-methoxyphenyl)adamantan-2-amine (8)

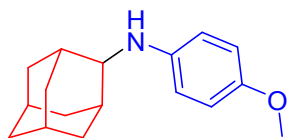

A glass vial in a 10 mL titanium autoclave was charged with catalyst **Os2** (1.16 mg, 1.0  $\mu\text{mol}$ , 0.25 mol%), 2,2'-bipyridine (0.96 mg, 6.0  $\mu\text{mol}$ , 1.5 mol%), water (400  $\mu\text{L}$ ), 4-methoxyaniline (98.8 mg, 200 mol %, 0.8 mmol) and 2-adamantanoe (60.5 mg, 100 mol%, 0.4 mmol). The autoclave was sealed, flushed three times with 10 bar of CO, and then charged with CO (50 bar). The reactor was placed into a preheated to 180°C oil bath for 22 h. After the indicated time, the reactor was cooled to room temperature and depressurized. The reaction mixture was transferred into a measuring flask and diluted with dichloromethane to 5 mL, 1 ml aliquot was analyzed by NMR. 82% NMR yield. Purification: DCM fraction was washed with water, after that solvent was removed under reduced pressure and the residue was purified using column chromatography using InterChim PuriFlash chromatograph in DCM-MeOH gradient system ( $R_f=0.3$  DCM). Isolated as a brown solid - 70% (72.5 mg).

$^1\text{H}$  NMR (300 MHz,  $\text{CDCl}_3$ )  $\delta$  6.78 (d,  $J = 8.9$  Hz, 2H, ArH), 6.59 (d,  $J = 8.9$  Hz, 2H, ArH), 3.75 (s, 3H,  $\text{OCH}_3$ ), 3.48 (s, 1H, NCH), 2.10 – 1.69 (m, 12H, Adamantyl), 1.59 (m appears as d,  $J = 12.9$  Hz, 2H, Adamantyl).

$^{13}\text{C}$  NMR (101 MHz,  $\text{CDCl}_3$ )  $\delta$  151.8 ( $\text{C}_{\text{Ar-O}}$ ), 141.7 ( $\text{C}_{\text{Ar-N}}$ ), 115.1 ( $\text{C}_{\text{Ar}}$ ), 114.7 ( $\text{C}_{\text{Ar}}$ ), 57.9 (NCH), 56.0 ( $\text{OCH}_3$ ), 37.9 (Adamantyl), 37.6 (Adamantyl), 31.7 (Adamantyl), 31.6 (Adamantyl), 27.6 (Adamantyl), 27.5 (Adamantyl).

The obtained NMR data are in agreement with the literature report.<sup>4</sup>

### 4-(4-phenylbutan-2-yl)-morpholine (9)

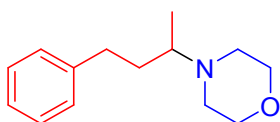

A glass vial in a 10 mL titanium autoclave was charged with catalyst **Os2** (1.16 mg, 1.0  $\mu\text{mol}$ , 0.25 mol%), 2,2'-bipyridine (0.96 mg, 6.0  $\mu\text{mol}$ , 1.5 mol%), water (400  $\mu\text{L}$ ), morpholine (70  $\mu\text{L}$ , 200 mol %, 0.8 mmol) and 4-phenylbutan-2-one (60.1  $\mu\text{L}$ , 100 mol%, 0.4 mmol). The autoclave was sealed, flushed three times with 10 bar of CO, and then charged with CO (50 bar). The reactor was placed into a preheated to 120°C oil bath for 22 h. After the indicated time, the reactor was cooled to room temperature and depressurized. The reaction mixture was transferred into a measuring flask and diluted with dichloromethane to 5 mL, 1 ml aliquot was analyzed by NMR. 83% NMR yield. Purification: DCM fraction was washed with water, after that solvent was removed under reduced pressure and the residue was purified by column chromatography (eluent/hexane/ethyl acetate/triethylamine = 4/1/0.1,  $R_f = 0.19$ ) to afford 62 mg (71 %) of the product as a yellowish oil.

$^1\text{H}$  NMR (400 MHz,  $\text{CDCl}_3$ )  $\delta$  7.39 – 7.07 (m, 5H, ArH), 3.79 – 3.53 (m, 4H,  $\text{CH}_2\text{O}$ ), 2.81 – 2.24 (m, 7H,  $\text{PhCH}_2$ ,  $\text{CH}_3\text{CHN}$ ,  $\text{CH}_2\text{N}$ ), 1.90 – 1.78 (m, 1H,  $\text{CCHHC}$ ), 1.65 – 1.42 (m, 1H,  $\text{CCHHC}$ ), 1.02 (d,  $J = 6.6$  Hz, 3H,  $\text{CHCH}_3$ ).

$^{13}\text{C}$  NMR (101 MHz,  $\text{CDCl}_3$ )  $\delta$  142.6 ( $\text{C}_{\text{Ar}}\text{-C}$ ), 128.5 ( $\text{C}_{\text{Ar}}$ ), 128.4 ( $\text{C}_{\text{Ar}}$ ), 125.8 ( $\text{C}_{\text{Ar}}$ ), 67.4 ( $\text{CH}_2\text{O}$ ), 58.5 ( $\text{CHN}$ ), 48.7 ( $\text{CH}_2\text{N}$ ), 35.2 ( $\text{CCH}_2\text{C}$ ), 32.9 ( $\text{PhCH}_2$ ), 13.9 ( $\text{CH}_3$ ).

The obtained NMR data are in agreement with the literature report.<sup>10</sup>

### N-benzyl-4-phenylbutan-2-amine (10)

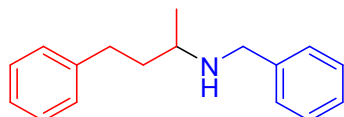

A glass vial in a 10 mL titanium autoclave was charged with catalyst **Os2** (1.16 mg, 1.0  $\mu\text{mol}$ , 0.25 mol%), 2,2'-bipyridine (0.96 mg, 6.0  $\mu\text{mol}$ , 1.5 mol%), water (400  $\mu\text{L}$ ), phenylmethanamine (87.6  $\mu\text{L}$ , 200 mol %, 0.8 mmol) and 4-phenylbutan-2-one (60.1  $\mu\text{L}$ , 100 mol%, 0.4 mmol). The autoclave was sealed, flushed three times with 10 bar of  $\text{CO}$ , and then charged with  $\text{CO}$  (50 bar). The reactor was placed into a preheated to  $140^\circ\text{C}$  oil bath for 22 h. After the indicated time, the reactor was cooled to room temperature and depressurized. The reaction mixture was transferred into a measuring flask and diluted with dichloromethane to 5 mL, 1 ml aliquot was analyzed by NMR. 84% NMR yield. Purification: DCM fraction was washed with water, after that solvent was removed under reduced pressure and the residue was purified by column chromatography (eluent/hexane/ethyl acetate/triethylamine = 4/1/0.1,  $R_f$  = 0.17) to afford 79.7 mg (83 %) of the product as a yellowish oil.

$^1\text{H}$  NMR (400 MHz,  $\text{CDCl}_3$ )  $\delta$  7.47 – 7.00 (m, 10H, ArH), 3.79 (m, 2H,  $\text{NCH}_2$ ), 2.80 – 2.58 (m, 3H,  $\text{PhCH}_2\text{C}$ ,  $\text{NCHCH}_3$ ), 2.51 (s, 1H, NH), 1.88 – 1.77 (m, 1H,  $\text{CCHHC}$ ), 1.74 – 1.60 (m, 1H,  $\text{CCHHC}$ ), 1.16 (d,  $J$  = 6.3 Hz, 3H,  $\text{CHCH}_3$ ).

$^{13}\text{C}$  NMR (101 MHz,  $\text{CDCl}_3$ )  $\delta$  142.6 ( $\text{C}_{\text{Ar}}\text{-C}$ ), 140.9 ( $\text{C}_{\text{Ar}}\text{-C}$ ), 128.5 ( $\text{C}_{\text{Ar}}$ ), 128.46 ( $\text{C}_{\text{Ar}}$ ), 128.45 ( $\text{C}_{\text{Ar}}$ ), 128.3 ( $\text{C}_{\text{Ar}}$ ), 127.0 ( $\text{C}_{\text{Ar}}$ ), 125.8 ( $\text{C}_{\text{Ar}}$ ), 52.1 (C-N), 51.4 (C-N), 38.8 ( $\text{CCH}_2\text{C}$ ), 32.4 ( $\text{PhCH}_2\text{C}$ ), 20.5 ( $\text{CHCH}_3$ ).

The obtained NMR data are in agreement with the literature report.<sup>8</sup>

### N-benzylcyclopentanamine (11)

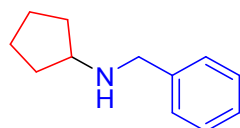

A glass vial in a 10 mL titanium autoclave was charged with catalyst **Os2** (1.16 mg, 1.0  $\mu\text{mol}$ , 0.25 mol%), 2,2'-bipyridine (0.96 mg, 6.0  $\mu\text{mol}$ , 1.5 mol%), water (400  $\mu\text{L}$ ), cyclopentanone (35.4  $\mu\text{L}$ , 100 mol%, 0.4 mmol) and phenylmethanamine (87.6  $\mu\text{L}$ , 200 mol %, 0.8 mmol). The autoclave was sealed, flushed three times with 10 bar of  $\text{CO}$ , and then charged with  $\text{CO}$  (50 bar). The reactor was placed into a preheated to  $140^\circ\text{C}$  oil bath for 22 h. After the indicated time, the reactor was cooled to room temperature and depressurized. The reaction mixture was transferred into a measuring flask and diluted with dichloromethane to 5 mL, 1 ml aliquot was analyzed by NMR. 72% NMR yield. Purification: DCM fraction was washed with water, after that solvent was removed under reduced pressure and the residue was purified by column chromatography (eluent/hexane/ethyl acetate/triethylamine = 20/1/1,  $R_f$  = 0.33) to afford 49.5 mg (65%) of the product as a yellowish oil.

$^1\text{H}$  NMR (400 MHz,  $\text{CDCl}_3$ )  $\delta$  7.38 – 7.30 (m, 4H, ArH), 7.30 – 7.23 (m, 1H, ArH), 3.79 (s, 2H,  $\text{PhCH}_2\text{N}$ ), 3.14 (quint.,  $J = 6.7$  Hz, 1H, NCH), 1.93 – 1.81 (m, 2H, Cyclopentyl), 1.78 – 1.65 (m, 2H, Cyclopentyl), 1.62 – 1.48 (m, 2H, Cyclopentyl), 1.46 – 1.34 (m, 3H, NH, Cyclopentyl).

$^{13}\text{C}$  NMR (101 MHz,  $\text{CDCl}_3$ )  $\delta$  140.8 ( $\text{C}_{\text{Ar-C}}$ ), 128.5 ( $\text{C}_{\text{Ar}}$ ), 128.3 ( $\text{C}_{\text{Ar}}$ ), 126.9 ( $\text{C}_{\text{Ar}}$ ), 59.2 (NCH), 52.9 ( $\text{PhCH}_2\text{N}$ ), 33.3 (Cyclopentyl), 24.2 (Cyclopentyl).

The obtained NMR data are in agreement with the literature report.<sup>9</sup>

#### 4-(2-phenylpropyl)morpholine (12)

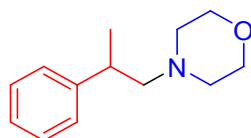

A glass vial in a 10 mL titanium autoclave was charged with catalyst **Os2** (1.16 mg, 1.0  $\mu\text{mol}$ , 0.25 mol%), 2,2'-bipyridine (0.96 mg, 6.0  $\mu\text{mol}$ , 1.5 mol%), water (400  $\mu\text{L}$ ), morpholine (70  $\mu\text{L}$ , 200 mol %, 0.8 mmol) and 2-phenylpropanal (48.9  $\mu\text{L}$ , 100 mol%, 0.4 mmol). The autoclave was sealed, flushed three times with 10 bar of CO, and then charged with CO (50 bar). The reactor was placed into a preheated to 120°C oil bath for 22 h. After the indicated time, the reactor was cooled to room temperature and depressurized. The reaction mixture was transferred into a measuring flask and diluted with dichloromethane to 5 mL, 1 ml aliquot was analyzed by NMR. 71% NMR yield. Purification: DCM fraction was washed with water, after that solvent was removed under reduced pressure and the residue was purified by column chromatography (eluent/hexane/ethyl acetate/triethylamine = 10/1/0.1,  $R_f = 0.13$ ) to afford 50.9 mg (63 %) of the product as a yellowish oil.

$^1\text{H}$  NMR (400 MHz,  $\text{CDCl}_3$ )  $\delta$  7.34 – 7.16 (m, 5H, ArH), 3.74 – 3.63 (m, 4H,  $\text{OCH}_2\text{CH}_2\text{N}$ ), 3.03 – 2.87 (m, 1H,  $\text{CHCH}_3$ ), 2.59 – 2.44 (m, 4H,  $\text{OCH}_2\text{CH}_2\text{N}$ ), 2.44 – 2.32 (m, 2H,  $\text{NCH}_2\text{CH}$ ), 1.29 (d,  $J = 6.6$  Hz, 3H,  $\text{CHCH}_3$ ).

$^{13}\text{C}$  NMR (101 MHz,  $\text{CDCl}_3$ )  $\delta$  146.1 ( $\text{C}_{\text{Ar-C}}$ ), 128.4 ( $\text{C}_{\text{Ar}}$ ), 127.3 ( $\text{C}_{\text{Ar}}$ ), 126.2 ( $\text{C}_{\text{Ar}}$ ), 67.2 ( $\text{OCH}_2\text{CH}_2\text{N}$ ), 66.7 ( $\text{NCH}_2\text{CH}$ ), 54.1 ( $\text{OCH}_2\text{CH}_2\text{N}$ ), 37.2 ( $\text{CHCH}_3$ ), 20.0 ( $\text{CHCH}_3$ ).

The obtained NMR data are in agreement with the literature report.<sup>10</sup>

#### 4-(3-(4-isopropylphenyl)-2-methylpropyl)morpholine (13)

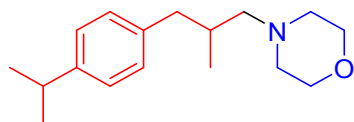

A glass vial in a 10 mL titanium autoclave was charged with catalyst **Os2** (1.16 mg, 1.0  $\mu\text{mol}$ , 0.25 mol%), 2,2'-bipyridine (0.96 mg, 6.0  $\mu\text{mol}$ , 1.5 mol%), water (400  $\mu\text{L}$ ), morpholine (70  $\mu\text{L}$ , 200 mol %, 0.8 mmol) and 3-(4-isopropylphenyl)-2-methylpropanal (80.1  $\mu\text{L}$ , 100 mol%, 0.4 mmol). The autoclave was sealed, flushed three times with 10 bar of CO, and then charged with CO (50 bar). The reactor was placed into a preheated to 120°C oil bath for 22 h. After the indicated time, the reactor was cooled to room temperature and depressurized. The reaction mixture was transferred into a measuring flask and diluted with dichloromethane to 5 mL, 1 ml aliquot was analyzed by NMR. 71% NMR yield. Purification: DCM fraction was washed with water, after that solvent was removed under



reduced pressure and the residue was purified by column chromatography (eluent: hexane/ethyl acetate/triethylamine = 4/1/0.1,  $R_f$  = 0.27), dissolved in diluted HCl and washed with diethyl ether (2 x 3 ml). The water solution was basified with KOH, the product extracted with diethyl ether (3 x 3 ml) and dried with  $\text{Na}_2\text{SO}_4$ . After removal of the solvent *in vacuo* 69 mg (66 %) of the product was obtained as a yellowish oil.

$^1\text{H}$  NMR (400 MHz,  $\text{CDCl}_3$ )  $\delta$  7.14 (d,  $J$  = 7.7 Hz, 2H, ArH), 7.08 (d,  $J$  = 7.7 Hz, 2H, ArH), 3.73 (t,  $J$  = 4.3 Hz, 4H,  $\text{OCH}_2\text{CH}_2\text{N}$ ), 2.95 – 2.83 (m, 1H,  $\text{CH}(\text{CH}_3)_2$ ), 2.82 - 2.74 (m, 1H,  $\text{CHCH}_2$ ), 2.43 (br. s, 4H,  $\text{OCH}_2\text{CH}_2\text{N}$ ), 2.35 – 2.19 (m, 2H,  $\text{CHCH}_2$ ), 2.18 – 2.10 (m, 1H,  $\text{CHCH}_2$ ), 2.05 – 1.88 (m, 1H,  $\text{CHCH}_3$ ), 1.25 (d,  $J$  = 6.9 Hz, 6H,  $\text{CH}(\text{CH}_3)_2$ ), 0.87 (d,  $J$  = 6.5 Hz, 3H,  $\text{CHCH}_3$ ).

$^{13}\text{C}$  NMR (101 MHz,  $\text{CDCl}_3$ )  $\delta$  146.3 ( $\text{C}_{\text{Ar}}\text{-CH}(\text{CH}_3)_2$ ), 138.3 ( $\text{C}_{\text{Ar}}\text{-CH}_2$ ), 129.3 ( $\text{C}_{\text{Ar}}$ ), 126.2 ( $\text{C}_{\text{Ar}}$ ), 67.2 ( $\text{OCH}_2\text{CH}_2\text{N}$ ), 65.5 ( $\text{NCH}_2\text{CH}$ ), 54.1 ( $\text{OCH}_2\text{CH}_2\text{N}$ ), 40.9 ( $\text{PhCH}_2$ ), 33.8 (CH), 32.1 (CH), 24.2 ( $\text{CH}(\text{CH}_3)_2$ ), 18.2 ( $\text{CHCH}_3$ ).

HRMS (TOF ESI+): for  $\text{C}_{17}\text{H}_{28}\text{NO}^+$   $[\text{M}+\text{H}]^+$  calculated  $m/z$  262.2165, found  $m/z$  262.2165.

#### 4-(4-methoxybenzyl)morpholine (14)

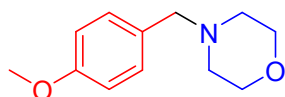

A glass vial in a 10 mL titanium autoclave was charged with catalyst **Os2** (0.29 mg, 0.25  $\mu\text{mol}$ , 0.0625 mol%), 2,2'-bipyridine (0.96 mg, 6.0  $\mu\text{mol}$ , 1.5 mol%), water (400  $\mu\text{L}$ ), morpholine (70  $\mu\text{L}$ , 200 mol %, 0.8 mmol) and 4-methoxybenzaldehyde (48.8  $\mu\text{L}$ , 100 mol%, 0.4 mmol). The autoclave was sealed, flushed three times with 10 bar of CO, and then charged with CO (50 bar). The reactor was placed into a preheated to 120°C oil bath for 22 h. After the indicated time, the reactor was cooled to room temperature and depressurized. The reaction mixture was transferred into a measuring flask and diluted with dichloromethane to 5 mL, 1 ml aliquot was analyzed by NMR. 80% NMR yield. Purification: DCM fraction was washed with water, after that solvent was removed under reduced pressure and the residue was purified using column chromatography, eluent hexane/ethyl acetate/triethylamine 4/1/0.05 ( $R_f$  = 0.13). Isolated as a yellow oil - 75% (65.5 mg).

$^1\text{H}$  NMR (400 MHz,  $\text{CDCl}_3$ )  $\delta$  7.23 (d,  $J$  = 8.6 Hz, 2H, ArH), 6.85 (d,  $J$  = 8.6 Hz, 2H, ArH), 3.79 (s, 3H,  $\text{OCH}_3$ ), 3.70 (t,  $J$  = 4.7 Hz, 4H,  $\text{OCH}_2\text{CH}_2\text{N}$ ), 3.43 (s, 2H,  $\text{PhCH}_2\text{N}$ ), 2.45 – 2.39 (m, 4H,  $\text{OCH}_2\text{CH}_2\text{N}$ ).

$^{13}\text{C}$  NMR (101 MHz,  $\text{CDCl}_3$ )  $\delta$  158.9 ( $\text{C}_{\text{Ar}}\text{-O}$ ), 130.5 ( $\text{C}_{\text{Ar}}\text{-C}$ ), 129.8 ( $\text{C}_{\text{Ar}}$ ), 113.7 ( $\text{C}_{\text{Ar}}$ ), 67.1 ( $\text{OCH}_2\text{CH}_2\text{N}$ ), 63.0 ( $\text{PhCH}_2\text{N}$ ), 55.3 ( $\text{OCH}_3$ ), 53.6 ( $\text{OCH}_2\text{CH}_2\text{N}$ ).

The obtained NMR data are in agreement with the literature report.<sup>11</sup>



## 2-methyl-N-(naphthalen-1-ylmethyl)propan-2-amine (15)

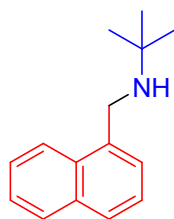

A glass vial in a 10 mL titanium autoclave was charged with catalyst **Os2** (1.16 mg, 1.0  $\mu\text{mol}$ , 0.25 mol%), 2,2'-bipyridine (0.96 mg, 6.0  $\mu\text{mol}$ , 1.5 mol%), water (400  $\mu\text{L}$ ), 1-naphthaldehyde (54  $\mu\text{L}$ , 100 mol%, 0.4 mmol) and tert-butylamine (421.6  $\mu\text{L}$ , 500 mol %, 2 mmol). The autoclave was sealed, flushed three times with 10 bar of CO, and then charged with CO (50 bar). The reactor was placed into a preheated to 160°C oil bath for 22 h. After the indicated time, the reactor was cooled to room temperature and depressurized. The reaction mixture was transferred into a measuring flask and diluted with dichloromethane to 5 mL, 1 ml aliquot was analyzed by NMR. 63% NMR yield. Purification: DCM fraction was washed with water, after that solvent was removed under reduced pressure and the residue was purified by column chromatography (eluent/hexane/ethyl acetate/triethylamine = 20/1/1, Rf = 0.41) to afford 43.8 mg (51 %) of the product as a yellowish oil.

$^1\text{H}$  NMR (400 MHz,  $\text{CDCl}_3$ )  $\delta$  8.17 (d,  $J$  = 8.4 Hz, 1H, ArH), 7.87 (d,  $J$  = 8.1 Hz, 1H, ArH), 7.78 (d,  $J$  = 8.2 Hz, 1H, ArH), 7.62 – 7.37 (m, 4H, ArH), 4.20 (s, 2H,  $\text{CH}_2\text{N}$ ), 1.30 (s, 9H,  $\text{C}(\text{CH}_3)_3$ ).

$^{13}\text{C}$  NMR (101 MHz,  $\text{CDCl}_3$ )  $\delta$  137.0 ( $\text{C}_{\text{Ar}}\text{-CH}_2$ ), 134.0 ( $\text{C}_{\text{Ar}}\text{-C}$ ), 132.0 ( $\text{C}_{\text{Ar}}\text{-C}$ ), 128.8 ( $\text{C}_{\text{Ar}}$ ), 127.7 ( $\text{C}_{\text{Ar}}$ ), 126.4 ( $\text{C}_{\text{Ar}}$ ), 126.1 ( $\text{C}_{\text{Ar}}$ ), 125.7 ( $\text{C}_{\text{Ar}}$ ), 125.6 ( $\text{C}_{\text{Ar}}$ ), 123.9 ( $\text{C}_{\text{Ar}}$ ), 51.0 ( $\underline{\text{C}}(\text{CH}_3)_3$ ), 44.9 ( $\text{CH}_2\text{N}$ ), 29.3 ( $\text{C}(\underline{\text{C}}\text{H}_3)_3$ ).

The obtained NMR data are in agreement with the literature report.<sup>12</sup>

## 6. Details of DFT calculations

Geometry optimizations and frequency calculations for the decarboxylation stage of the WGS catalyzed by osmium complexes were carried out using Gaussian 09 software (revision D.01)<sup>13</sup> applying the M06-L functional<sup>14</sup> with SDD basis set. Water solvation was included using SMD model.<sup>15</sup> The optimized geometries were verified to have no negative frequencies for all intermediates and only one negative frequency for the transition states.

### Cartesian coordinates optimized at the M06-L/SDD level

[Os(CO)<sub>3</sub>Cl<sub>2</sub>(COOH)]<sup>-</sup> (the COOH group is opposite to the CO ligand)

|    |              |              |              |
|----|--------------|--------------|--------------|
| 76 | -0.039379000 | 0.483018000  | 0.509308000  |
| 17 | -1.961343000 | 1.528528000  | 1.853353000  |
| 17 | -0.230623000 | -1.607191000 | 1.938434000  |
| 6  | 0.138747000  | 2.121886000  | -0.412878000 |
| 6  | 1.384612000  | -0.328525000 | -0.416960000 |
| 8  | 0.248253000  | 3.157063000  | -0.970186000 |
| 8  | 2.277853000  | -0.853790000 | -0.980577000 |
| 6  | 1.348368000  | 1.141693000  | 1.998951000  |
| 8  | 2.582833000  | 0.905886000  | 2.016470000  |
| 6  | -1.438457000 | -0.249070000 | -0.698049000 |
| 8  | -2.294741000 | -0.670181000 | -1.378457000 |
| 8  | 0.870267000  | 1.869436000  | 3.098687000  |
| 1  | -0.109252000 | 2.004692000  | 3.027172000  |

TS for decarboxylation of [Os(CO)<sub>3</sub>Cl<sub>2</sub>(COOH)]<sup>-</sup> (the COOH group is opposite to the CO ligand)

|    |              |              |              |
|----|--------------|--------------|--------------|
| 76 | -0.153717000 | 0.468903000  | 0.512197000  |
| 17 | -2.097293000 | 1.445752000  | 1.853487000  |
| 17 | -0.357340000 | -1.655231000 | 1.858846000  |
| 6  | -0.009043000 | 2.131270000  | -0.386945000 |
| 6  | 1.363605000  | -0.256690000 | -0.361020000 |
| 8  | 0.068853000  | 3.172354000  | -0.932286000 |
| 8  | 2.309766000  | -0.717526000 | -0.883603000 |
| 6  | 1.428155000  | 1.146112000  | 2.118479000  |
| 8  | 2.461396000  | 0.441430000  | 2.190531000  |
| 6  | -1.399091000 | -0.290494000 | -0.786483000 |
| 8  | -2.167942000 | -0.738916000 | -1.547307000 |
| 8  | 1.152050000  | 2.250196000  | 2.850317000  |
| 1  | 0.121531000  | 1.553019000  | 2.146242000  |

[Os(CO)<sub>3</sub>Cl<sub>2</sub>(COOH)]<sup>-</sup> (the COOH group is opposite to Cl<sup>-</sup>)

|    |              |              |              |
|----|--------------|--------------|--------------|
| 76 | -0.059202000 | 0.502054000  | 0.545961000  |
| 17 | -1.966647000 | 1.560066000  | 1.967406000  |
| 17 | -0.337246000 | -1.645307000 | 1.932046000  |
| 6  | 0.126090000  | 2.071888000  | -0.448696000 |
| 6  | 1.480763000  | -0.394373000 | -0.551938000 |
| 8  | 0.234292000  | 3.074236000  | -1.071118000 |
| 8  | 1.996423000  | 0.044332000  | -1.607465000 |
| 6  | 1.257481000  | 1.079777000  | 1.895659000  |
| 8  | 2.035092000  | 1.396380000  | 2.711199000  |
| 6  | -1.416797000 | -0.203391000 | -0.687981000 |
| 8  | 2.029197000  | -1.591387000 | -0.068146000 |
| 1  | 1.530910000  | -1.906869000 | 0.729315000  |
| 8  | -2.249517000 | -0.637496000 | -1.387397000 |

**TS for decarboxylation of  $[\text{Os}(\text{CO})_3\text{Cl}_2(\text{COOH})]^-$  (the COOH group is opposite to  $\text{Cl}^-$ )**

|    |              |              |              |
|----|--------------|--------------|--------------|
| 76 | 0.015794000  | 0.431533000  | 0.642004000  |
| 17 | -2.008767000 | 1.609772000  | 1.775251000  |
| 17 | -0.578471000 | -1.688431000 | 1.914368000  |
| 6  | 0.439670000  | 2.005238000  | -0.319322000 |
| 6  | 1.356583000  | -0.513658000 | -0.881732000 |
| 8  | 0.699204000  | 2.987180000  | -0.916845000 |
| 8  | 1.204633000  | -0.298324000 | -2.104912000 |
| 6  | 1.129450000  | 1.062656000  | 2.124872000  |
| 8  | 1.735257000  | 1.436677000  | 3.052848000  |
| 6  | -1.359261000 | -0.282160000 | -0.639704000 |
| 8  | 2.265112000  | -1.278307000 | -0.288900000 |
| 1  | 1.456027000  | -0.565249000 | 0.782505000  |
| 8  | -2.196147000 | -0.713044000 | -1.323907000 |

**$[\text{Os}(\text{bipy})(\text{CO})\text{Cl}_2(\text{COOH})]^-$**

|    |              |              |              |
|----|--------------|--------------|--------------|
| 76 | 1.286658000  | 5.599103000  | 13.014583000 |
| 17 | 2.631154000  | 6.185324000  | 15.065689000 |
| 17 | 0.043374000  | 5.229799000  | 10.831790000 |
| 8  | 3.811447000  | 3.990614000  | 12.660532000 |
| 8  | -0.562230000 | 3.718585000  | 14.537181000 |
| 7  | 2.416905000  | 7.129628000  | 11.948940000 |
| 7  | 0.201301000  | 7.436694000  | 13.378228000 |
| 6  | 1.958013000  | 8.419924000  | 12.064845000 |
| 6  | 3.508294000  | 6.878289000  | 11.180471000 |
| 1  | 3.822375000  | 5.845229000  | 11.113258000 |
| 6  | 4.196262000  | 7.893257000  | 10.513476000 |
| 1  | 5.059098000  | 7.647104000  | 9.911732000  |
| 6  | 3.746358000  | 9.214563000  | 10.640844000 |
| 6  | 2.616914000  | 9.477033000  | 11.420138000 |
| 6  | 0.149001000  | 9.842027000  | 13.112614000 |
| 6  | -1.014749000 | 9.915569000  | 13.882716000 |
| 6  | -1.564441000 | 8.732291000  | 14.396789000 |
| 1  | -2.463613000 | 8.743040000  | 14.996064000 |
| 6  | -0.933306000 | 7.518137000  | 14.126427000 |
| 1  | -1.329061000 | 6.585587000  | 14.504989000 |
| 6  | 0.745043000  | 8.595177000  | 12.871358000 |
| 6  | 2.552405000  | 4.072208000  | 12.529238000 |
| 6  | 0.187524000  | 4.451746000  | 13.931413000 |
| 1  | 2.250145000  | 10.488706000 | 11.519165000 |
| 1  | 4.259979000  | 10.022782000 | 10.137858000 |
| 1  | 0.588095000  | 10.743228000 | 12.707258000 |
| 1  | -1.480585000 | 10.872513000 | 14.075105000 |
| 8  | 2.001820000  | 2.898330000  | 11.910165000 |
| 1  | 1.050282000  | 3.061176000  | 11.712958000 |

**TS for decarboxylation of  $[\text{Os}(\text{bipy})(\text{CO})\text{Cl}_2(\text{COOH})]^-$**

|    |              |             |              |
|----|--------------|-------------|--------------|
| 76 | 1.230096000  | 5.544666000 | 12.980380000 |
| 17 | 2.491333000  | 6.157784000 | 15.053170000 |
| 17 | -0.322130000 | 5.599919000 | 10.943510000 |
| 8  | 3.928798000  | 4.014807000 | 13.155565000 |
| 8  | -0.502927000 | 3.587535000 | 14.545831000 |
| 7  | 2.376846000  | 7.061737000 | 11.922031000 |
| 7  | 0.161942000  | 7.423061000 | 13.377487000 |
| 6  | 1.936144000  | 8.358907000 | 12.042429000 |
| 6  | 3.465674000  | 6.797532000 | 11.153831000 |
| 1  | 3.765916000  | 5.761996000 | 11.074344000 |
| 6  | 4.167320000  | 7.803627000 | 10.489027000 |
| 1  | 5.027515000  | 7.546065000 | 9.888286000  |

|   |              |              |              |
|---|--------------|--------------|--------------|
| 6 | 3.735229000  | 9.129425000  | 10.618599000 |
| 6 | 2.608907000  | 9.406366000  | 11.398291000 |
| 6 | 0.167990000  | 9.818046000  | 13.110240000 |
| 6 | -0.986325000 | 9.914228000  | 13.893326000 |
| 6 | -1.560713000 | 8.747225000  | 14.413864000 |
| 1 | -2.452545000 | 8.779557000  | 15.022948000 |
| 6 | -0.958053000 | 7.518867000  | 14.135920000 |
| 1 | -1.363911000 | 6.592846000  | 14.519867000 |
| 6 | 0.730791000  | 8.558548000  | 12.859447000 |
| 6 | 2.764384000  | 4.085506000  | 12.655133000 |
| 6 | 0.186900000  | 4.349916000  | 13.923566000 |
| 1 | 2.257387000  | 10.423356000 | 11.497881000 |
| 1 | 4.260731000  | 9.931744000  | 10.118805000 |
| 1 | 0.622508000  | 10.711968000 | 12.707032000 |
| 1 | -1.425977000 | 10.881633000 | 14.094032000 |
| 8 | 2.365337000  | 3.201428000  | 11.682641000 |
| 1 | 1.293192000  | 4.231265000  | 11.837567000 |

**[Os(bipy)(CO)Cl<sub>2</sub>(COOH...OH<sub>2</sub>)]<sup>-</sup>**

|    |              |              |              |
|----|--------------|--------------|--------------|
| 76 | 1.529749000  | 5.654959000  | 12.852308000 |
| 17 | 2.758381000  | 6.218530000  | 14.981326000 |
| 17 | 0.424258000  | 5.457471000  | 10.565649000 |
| 8  | 4.170258000  | 4.330343000  | 12.390433000 |
| 8  | -0.280679000 | 3.696604000  | 14.313919000 |
| 7  | 2.614992000  | 7.322007000  | 11.938665000 |
| 7  | 0.314477000  | 7.405751000  | 13.261149000 |
| 6  | 2.053040000  | 8.568967000  | 12.081248000 |
| 6  | 3.769301000  | 7.191397000  | 11.235968000 |
| 1  | 4.166066000  | 6.188109000  | 11.156268000 |
| 6  | 4.417979000  | 8.285549000  | 10.660370000 |
| 1  | 5.336396000  | 8.132971000  | 10.111691000 |
| 6  | 3.857769000  | 9.561215000  | 10.809341000 |
| 6  | 2.664600000  | 9.701063000  | 11.522866000 |
| 6  | 0.093156000  | 9.808438000  | 13.092776000 |
| 6  | -1.104884000 | 9.761411000  | 13.810633000 |
| 6  | -1.584808000 | 8.519740000  | 14.251652000 |
| 1  | -2.506659000 | 8.437572000  | 14.809746000 |
| 6  | -0.851733000 | 7.369320000  | 13.961582000 |
| 1  | -1.190772000 | 6.393626000  | 14.282991000 |
| 6  | 0.790887000  | 8.620275000  | 12.827636000 |
| 6  | 2.899150000  | 4.209094000  | 12.371941000 |
| 6  | 0.453725000  | 4.441462000  | 13.698628000 |
| 1  | 2.213467000  | 10.676429000 | 11.639633000 |
| 1  | 4.336129000  | 10.428757000 | 10.375130000 |
| 1  | 0.480952000  | 10.756736000 | 12.747137000 |
| 1  | -1.649513000 | 10.671492000 | 14.022007000 |
| 8  | 2.499848000  | 2.918603000  | 11.952487000 |
| 1  | 1.503227000  | 2.807594000  | 11.861834000 |
| 8  | -0.108966000 | 2.487594000  | 11.432287000 |
| 1  | -0.699339000 | 2.306523000  | 12.187812000 |
| 1  | -0.328506000 | 3.376276000  | 11.065088000 |

**TS for decarboxylation of [Os(bipy)(CO)Cl<sub>2</sub>(COOH...OH<sub>2</sub>)]<sup>-</sup>**

|    |              |             |              |
|----|--------------|-------------|--------------|
| 76 | 1.375686000  | 5.645407000 | 12.863627000 |
| 17 | 2.392848000  | 6.214699000 | 15.116608000 |
| 17 | 0.154519000  | 5.678658000 | 10.624772000 |
| 8  | 4.198645000  | 4.698062000 | 12.722669000 |
| 8  | -0.569773000 | 3.673134000 | 14.107010000 |
| 7  | 2.501763000  | 7.270903000 | 11.906166000 |
| 7  | 0.229945000  | 7.470971000 | 13.280845000 |
| 6  | 2.006094000  | 8.541280000 | 12.068872000 |

|   |              |              |              |
|---|--------------|--------------|--------------|
| 6 | 3.546105000  | 7.072044000  | 11.062518000 |
| 1 | 3.879917000  | 6.048714000  | 10.965526000 |
| 6 | 4.165804000  | 8.125061000  | 10.385370000 |
| 1 | 4.994846000  | 7.919025000  | 9.723480000  |
| 6 | 3.693917000  | 9.429534000  | 10.580740000 |
| 6 | 2.598827000  | 9.636316000  | 11.424639000 |
| 6 | 0.233433000  | 9.884221000  | 13.278795000 |
| 6 | -0.929508000 | 9.894706000  | 14.054329000 |
| 6 | -1.512408000 | 8.676019000  | 14.428786000 |
| 1 | -2.413218000 | 8.641183000  | 15.024532000 |
| 6 | -0.904774000 | 7.485936000  | 14.024855000 |
| 1 | -1.317289000 | 6.523499000  | 14.297977000 |
| 6 | 0.799664000  | 8.658168000  | 12.899124000 |
| 6 | 3.002184000  | 4.244186000  | 12.954701000 |
| 6 | 0.225909000  | 4.442485000  | 13.619934000 |
| 1 | 2.198698000  | 10.630536000 | 11.565332000 |
| 1 | 4.155503000  | 10.266162000 | 10.073628000 |
| 1 | 0.698489000  | 10.814165000 | 12.981412000 |
| 1 | -1.368817000 | 10.834055000 | 14.361368000 |
| 8 | 2.819249000  | 3.008372000  | 13.391499000 |
| 1 | 1.774566000  | 2.374166000  | 11.842079000 |
| 8 | 1.564809000  | 3.004176000  | 11.105505000 |
| 1 | 0.672224000  | 2.870206000  | 10.729065000 |
| 1 | 1.674245000  | 4.099295000  | 11.698284000 |

**[Os(bipy)(CO)I<sub>2</sub>(COOH)]<sup>-</sup>**

|    |              |              |              |
|----|--------------|--------------|--------------|
| 76 | 1.269484000  | 5.589536000  | 12.952008000 |
| 53 | 2.693304000  | 6.188665000  | 15.329637000 |
| 53 | -0.171936000 | 5.158142000  | 10.532890000 |
| 8  | 3.841891000  | 4.099654000  | 12.518353000 |
| 8  | -0.639859000 | 3.732276000  | 14.424517000 |
| 7  | 2.411002000  | 7.143786000  | 11.909080000 |
| 7  | 0.182853000  | 7.440397000  | 13.326066000 |
| 6  | 1.962322000  | 8.436222000  | 12.052444000 |
| 6  | 3.496040000  | 6.902623000  | 11.126297000 |
| 1  | 3.800184000  | 5.868435000  | 11.039509000 |
| 6  | 4.190336000  | 7.926216000  | 10.480334000 |
| 1  | 5.047458000  | 7.685277000  | 9.868031000  |
| 6  | 3.756175000  | 9.248594000  | 10.643822000 |
| 6  | 2.630795000  | 9.502130000  | 11.432087000 |
| 6  | 0.181344000  | 9.853800000  | 13.151623000 |
| 6  | -0.979341000 | 9.922493000  | 13.925863000 |
| 6  | -1.557359000 | 8.732336000  | 14.391737000 |
| 1  | -2.456306000 | 8.739396000  | 14.991591000 |
| 6  | -0.953295000 | 7.516512000  | 14.073268000 |
| 1  | -1.367260000 | 6.577742000  | 14.415466000 |
| 6  | 0.750225000  | 8.604384000  | 12.860831000 |
| 6  | 2.570717000  | 4.074082000  | 12.520128000 |
| 6  | 0.139793000  | 4.450430000  | 13.838393000 |
| 1  | 2.273023000  | 10.514610000 | 11.555551000 |
| 1  | 4.277763000  | 10.064319000 | 10.162134000 |
| 1  | 0.640899000  | 10.760486000 | 12.783297000 |
| 1  | -1.421085000 | 10.881229000 | 14.160798000 |
| 8  | 2.072154000  | 2.779739000  | 12.153771000 |
| 1  | 1.093140000  | 2.814154000  | 12.076292000 |

**TS for decarboxylation of [Os(bipy)(CO)I<sub>2</sub>(COOH)]<sup>-</sup>**

|    |              |              |              |
|----|--------------|--------------|--------------|
| 76 | -0.178519000 | -0.656415000 | -0.136874000 |
| 53 | -2.841577000 | 0.386862000  | -0.041999000 |
| 53 | 2.631437000  | -1.011151000 | -0.535045000 |
| 8  | -1.775000000 | -2.154449000 | 2.047498000  |

|   |              |              |              |
|---|--------------|--------------|--------------|
| 8 | -1.001225000 | -2.252960000 | -2.600542000 |
| 7 | 0.404554000  | 0.650008000  | 1.512657000  |
| 7 | 0.267771000  | 1.285971000  | -1.076882000 |
| 6 | 0.714789000  | 1.951168000  | 1.193776000  |
| 6 | 0.548599000  | 0.229527000  | 2.797417000  |
| 1 | 0.311593000  | -0.806105000 | 2.998923000  |
| 6 | 0.989997000  | 1.078767000  | 3.812216000  |
| 1 | 1.094436000  | 0.696998000  | 4.817484000  |
| 6 | 1.291941000  | 2.410643000  | 3.498501000  |
| 6 | 1.153840000  | 2.846941000  | 2.178500000  |
| 6 | 0.798852000  | 3.611109000  | -0.709248000 |
| 6 | 0.677783000  | 3.863511000  | -2.078456000 |
| 6 | 0.354217000  | 2.808194000  | -2.942396000 |
| 1 | 0.252562000  | 2.961668000  | -4.007088000 |
| 6 | 0.154710000  | 1.534778000  | -2.407110000 |
| 1 | -0.105543000 | 0.693917000  | -3.035999000 |
| 6 | 0.592576000  | 2.311854000  | -0.223882000 |
| 6 | -0.813498000 | -2.173732000 | 1.212771000  |
| 6 | -0.675473000 | -1.637973000 | -1.619243000 |
| 1 | 1.397040000  | 3.866693000  | 1.916429000  |
| 1 | 1.638150000  | 3.092673000  | 4.262825000  |
| 1 | 1.047056000  | 4.413914000  | -0.029392000 |
| 1 | 0.831291000  | 4.862824000  | -2.462130000 |
| 8 | 0.050498000  | -3.240066000 | 1.168286000  |
| 1 | 0.607797000  | -2.188460000 | 0.275288000  |

## 7. X-ray investigations

Crystals of complexes **Os8** and **Os12** were obtained by slow interdiffusion of a two-phase system comprising hexane and a solution of the complex in dichloromethane (for **Os8**) and acetone (for **Os12**). X-ray diffraction data were collected at 120 K with APEX2 DUO CCD diffractometer using graphite monochromic Mo-K $\alpha$  radiation ( $\lambda = 0.71073$  Å,  $\omega$ -scans). Using Olex2,<sup>16</sup> the structures were solved with the ShelXT structure solution program<sup>17</sup> using Intrinsic Phasing and refined with the XL refinement package<sup>18</sup> using Least Squares minimization. Positions of hydrogen atoms were calculated, and they all were refined in the isotropic approximation within the riding model. Crystallographic data and structure refinement parameters are listed in Table S14. CCDC 2075332 and 2075331 contain the supplementary crystallographic data for **Os8** and **Os12**, respectively. These data can be obtained free of charge from The Cambridge Crystallographic Data Center via [www.ccdc.cam.ac.uk/data\\_request/cif](http://www.ccdc.cam.ac.uk/data_request/cif).

**Table S14. Crystallographic data and structure refinement parameters for Os8 and Os12.**

| Compound                                        | <b>Os8</b>                                                                       | <b>Os12</b>                                          |
|-------------------------------------------------|----------------------------------------------------------------------------------|------------------------------------------------------|
| Empirical formula                               | C <sub>26</sub> H <sub>16</sub> Cl <sub>2</sub> N <sub>2</sub> O <sub>2</sub> Os | C <sub>25</sub> H <sub>28</sub> ClNO <sub>2</sub> Os |
| Molecular weight                                | 649.51                                                                           | 600.13                                               |
| Crystal system                                  | Monoclinic                                                                       | Monoclinic                                           |
| Space group                                     | <i>P2<sub>1</sub>/n</i>                                                          | <i>P2<sub>1</sub>/c</i>                              |
| <i>a</i> (Å)                                    | 6.961(3)                                                                         | 9.4652(9)                                            |
| <i>b</i> (Å)                                    | 19.454(7)                                                                        | 9.6082(9)                                            |
| <i>c</i> (Å)                                    | 16.217(6)                                                                        | 24.647(3)                                            |
| $\beta$ (deg)                                   | 95.607(8)                                                                        | 90.999(3)                                            |
| <i>V</i> (Å <sup>3</sup> )                      | 2185.4(14)                                                                       | 2241.1(4)                                            |
| <i>Z</i>                                        | 4                                                                                | 4                                                    |
| <i>D</i> <sub>calcd</sub> (g cm <sup>-3</sup> ) | 1.974                                                                            | 1.779                                                |
| $2\theta_{\max}$ (deg)                          | 58                                                                               | 54                                                   |
| $\mu$ (Mo-K $\alpha$ ) (cm <sup>-3</sup> )      | 61.08                                                                            | 58.31                                                |
| Collected reflections                           | 5808                                                                             | 12741                                                |

|                                                             |                                    |                                    |
|-------------------------------------------------------------|------------------------------------|------------------------------------|
| Independent reflections                                     | 5808 ( $R_{\text{int}} = 0.0597$ ) | 4884 ( $R_{\text{int}} = 0.0670$ ) |
| Observed reflections ( $I > 2\sigma(I)$ )                   | 3768                               | 3625                               |
| Parameters                                                  | 299                                | 276                                |
| $R_I$ (on $F$ for obs. refls)                               | 0.0765                             | 0.0404                             |
| $wR_2$ (on $F^2$ for all refls)                             | 0.1486                             | 0.0798                             |
| $F(000)$                                                    | 1248                               | 1176                               |
| GOF                                                         | 1.072                              | 0.969                              |
| Largest diff. peak and hole ( $\text{e } \text{\AA}^{-3}$ ) | 1.939 and $-1.029$                 | 1.296 and $-1.148$                 |



## 8. $^1\text{H}$ and $^{13}\text{C}$ NMR spectra and HRMS of the obtained osmium complexes.

$[(\eta^6\text{-cymene})\text{OsI}_2]_2\text{Os}_2$   $^1\text{H}$  NMR (400 MHz,  $\text{CDCl}_3$ )

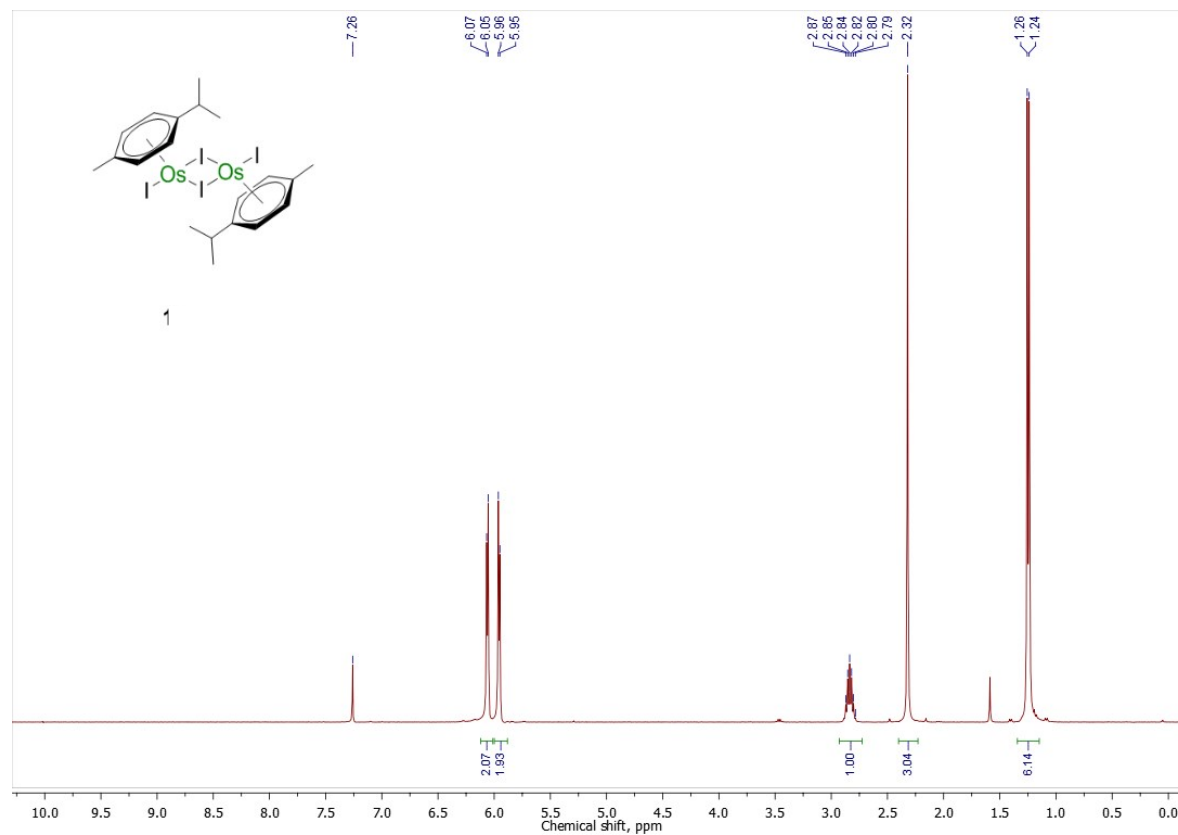

$[(\eta^6\text{-cymene})\text{OsI}_2]_2\text{Os}_2$   $^{13}\text{C}$  NMR (101 MHz,  $\text{CDCl}_3$ )

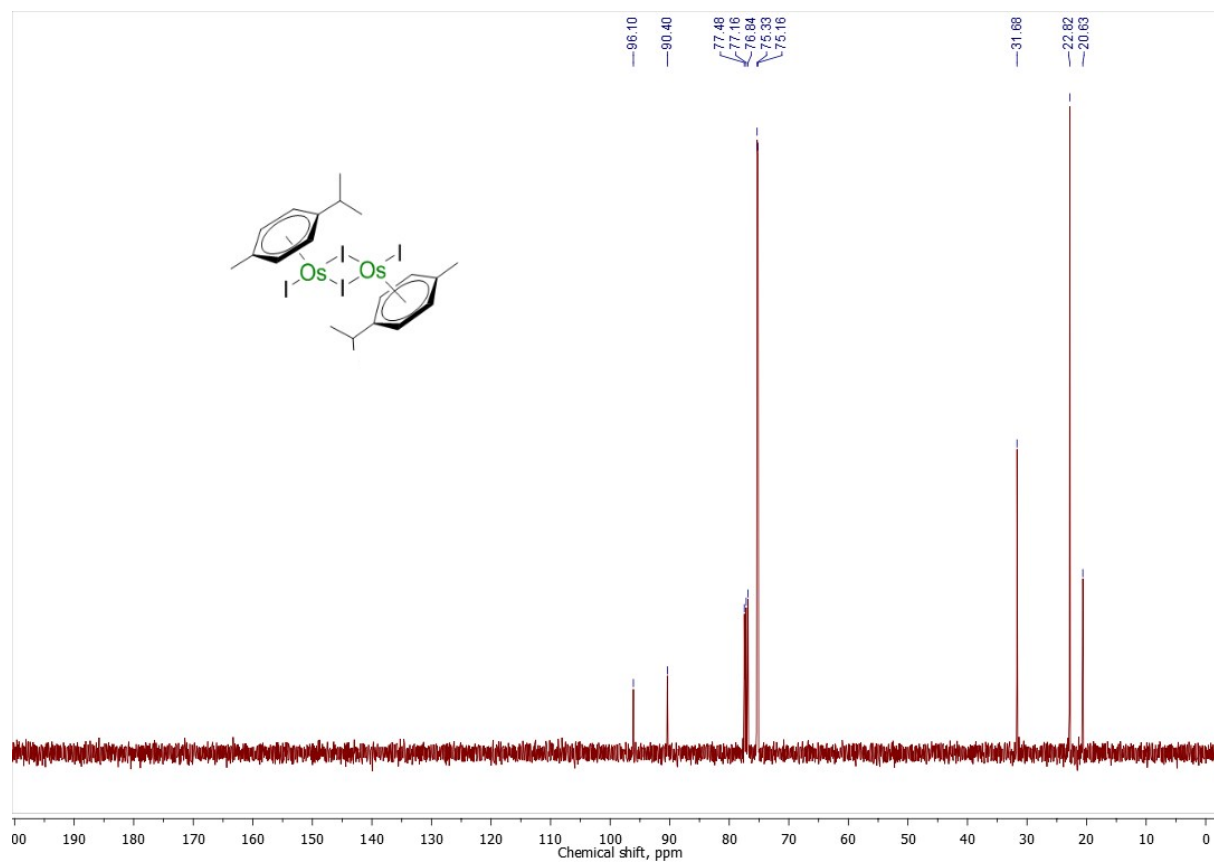

# Display Report

## Analysis Info

Analysis Name D:\Data\Kolotyrykina\2021\Loginov\0119025.d  
Method tune\_50-1600.m  
Sample Name /NGKO LD-32  
Comment C20H28I4Os2 calibrant added CH3CN

Acquisition Date 19.01.2021 13:24:27

Operator BDAL@DE  
Instrument / Ser# micrOTOF 10248

## Acquisition Parameter

|             |            |                      |          |                  |           |
|-------------|------------|----------------------|----------|------------------|-----------|
| Source Type | ESI        | Ion Polarity         | Positive | Set Nebulizer    | 1.0 Bar   |
| Focus       | Not active |                      |          | Set Dry Heater   | 200 °C    |
| Scan Begin  | 50 m/z     | Set Capillary        | 4500 V   | Set Dry Gas      | 4.0 l/min |
| Scan End    | 1600 m/z   | Set End Plate Offset | -500 V   | Set Divert Valve | Waste     |

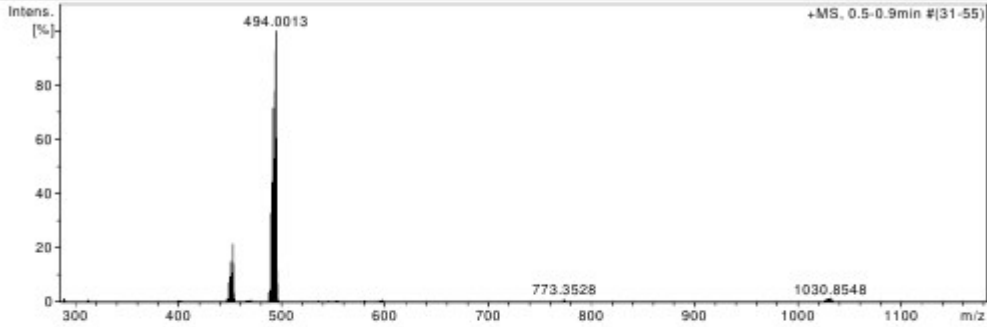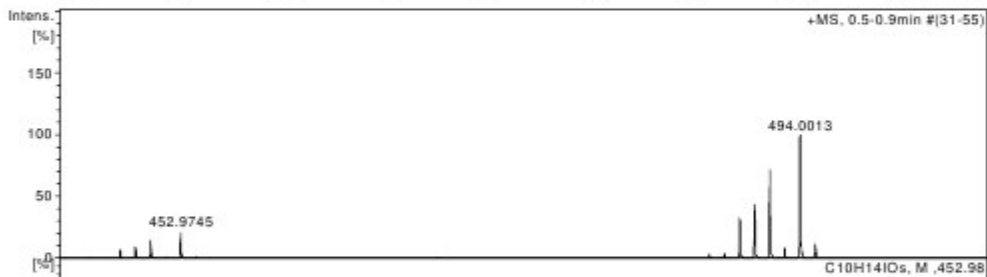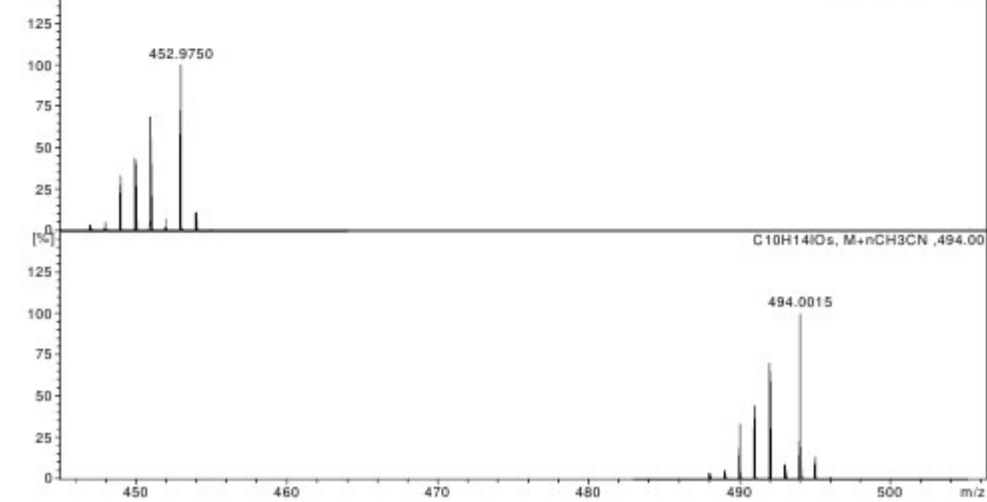

**$[(\eta^6\text{-cymene})\text{Os}(2,2'\text{-bipyridine})\text{Cl}]\text{Cl}$  Os3  $^1\text{H}$  NMR (400 MHz,  $\text{CD}_3\text{OD}$ )**

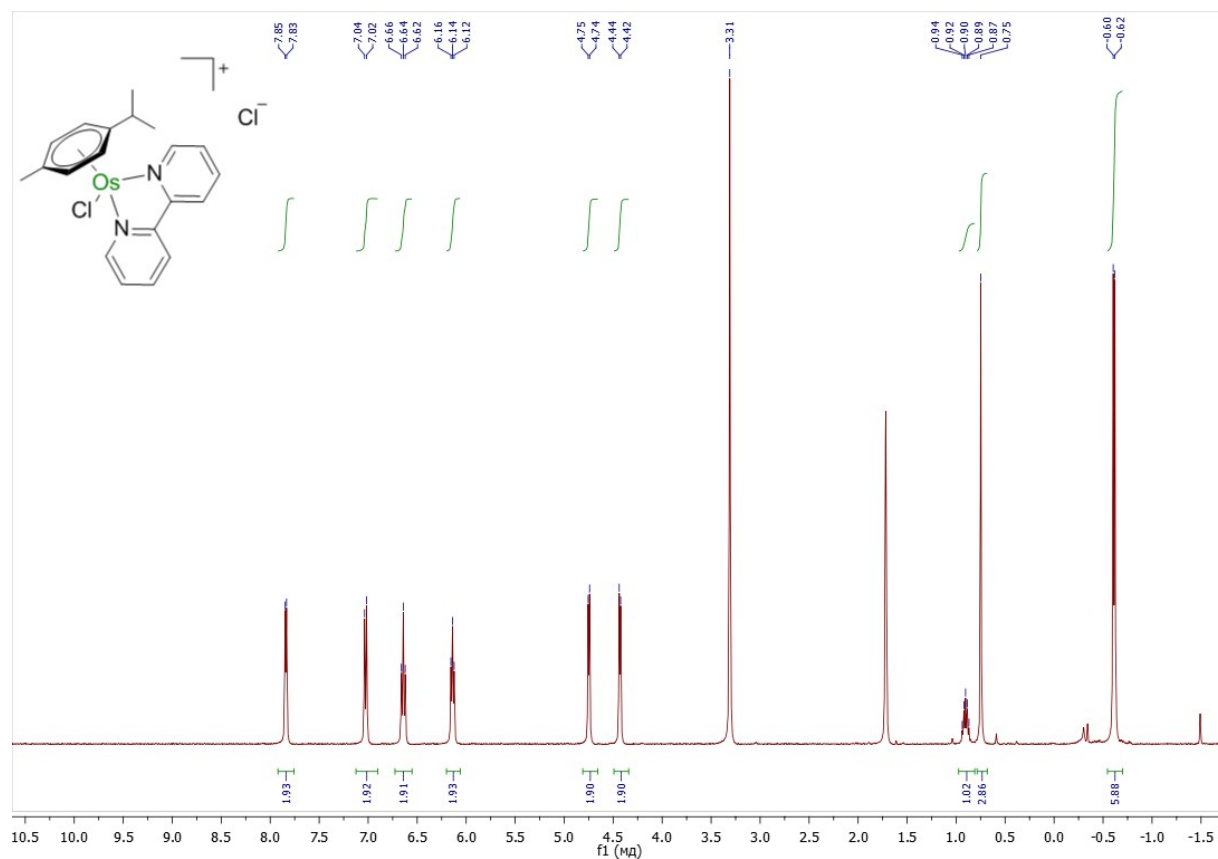

**$[(\eta^6\text{-cymene})\text{Os}(2,2'\text{-bipyridine})\text{Cl}]\text{Cl}$  Os3  $^{13}\text{C}$  NMR (75 MHz,  $\text{CD}_3\text{OD}$ )**

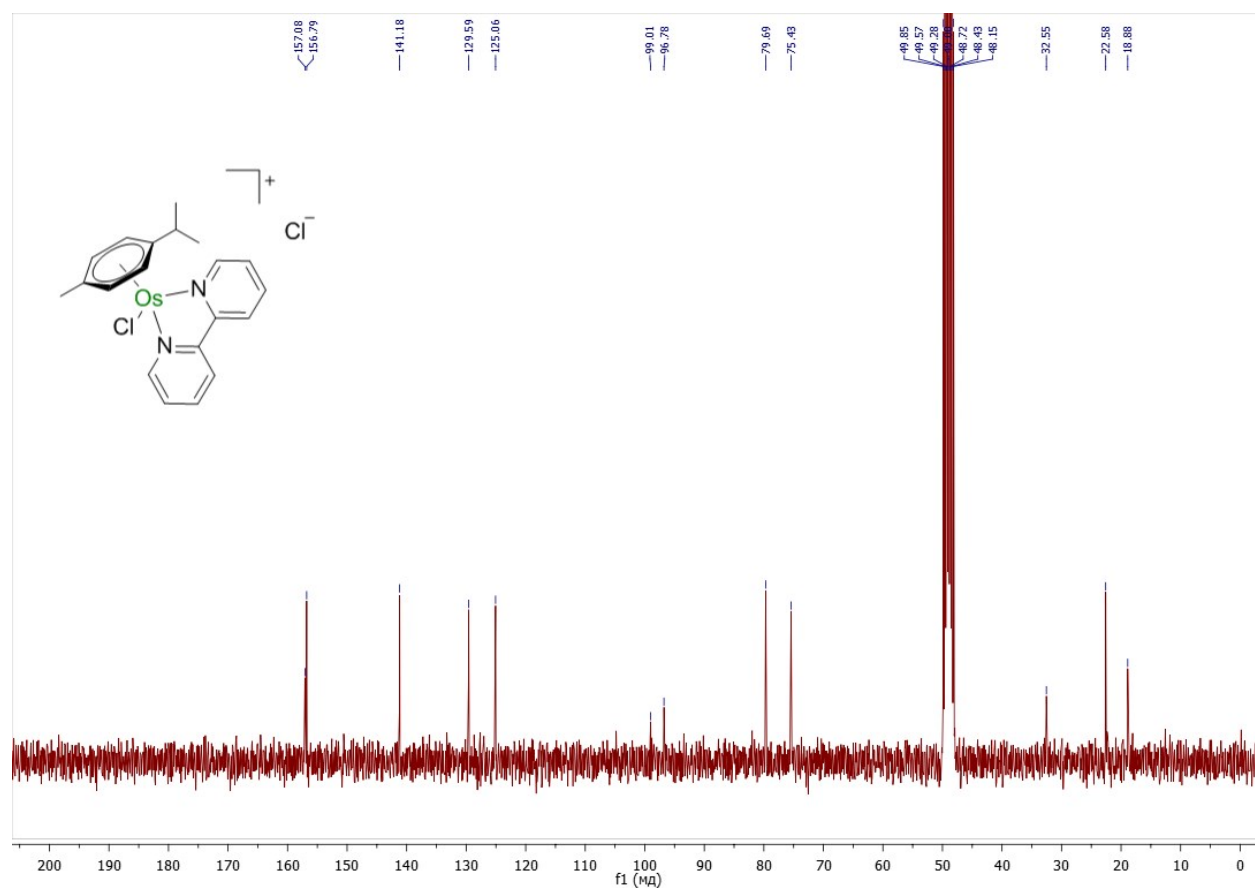

# Display Report

## Analysis Info

Analysis Name D:\Data\Kolotyrkina\2020\Loginov\1208040.d  
Method tune\_50-1600.m  
Sample Name /NGKO LD-28  
Comment C20H22N2O5Cl calibrant added CH3CN

Acquisition Date 08.12.2020 16:46:21

Operator BDAL@DE  
Instrument / Ser# micrOTOF 10248

## Acquisition Parameter

|             |            |                      |          |                  |           |
|-------------|------------|----------------------|----------|------------------|-----------|
| Source Type | ESI        | Ion Polarity         | Positive | Set Nebulizer    | 1.0 Bar   |
| Focus       | Not active |                      |          | Set Dry Heater   | 200 °C    |
| Scan Begin  | 50 m/z     | Set Capillary        | 4500 V   | Set Dry Gas      | 4.0 l/min |
| Scan End    | 1600 m/z   | Set End Plate Offset | -500 V   | Set Divert Valve | Waste     |

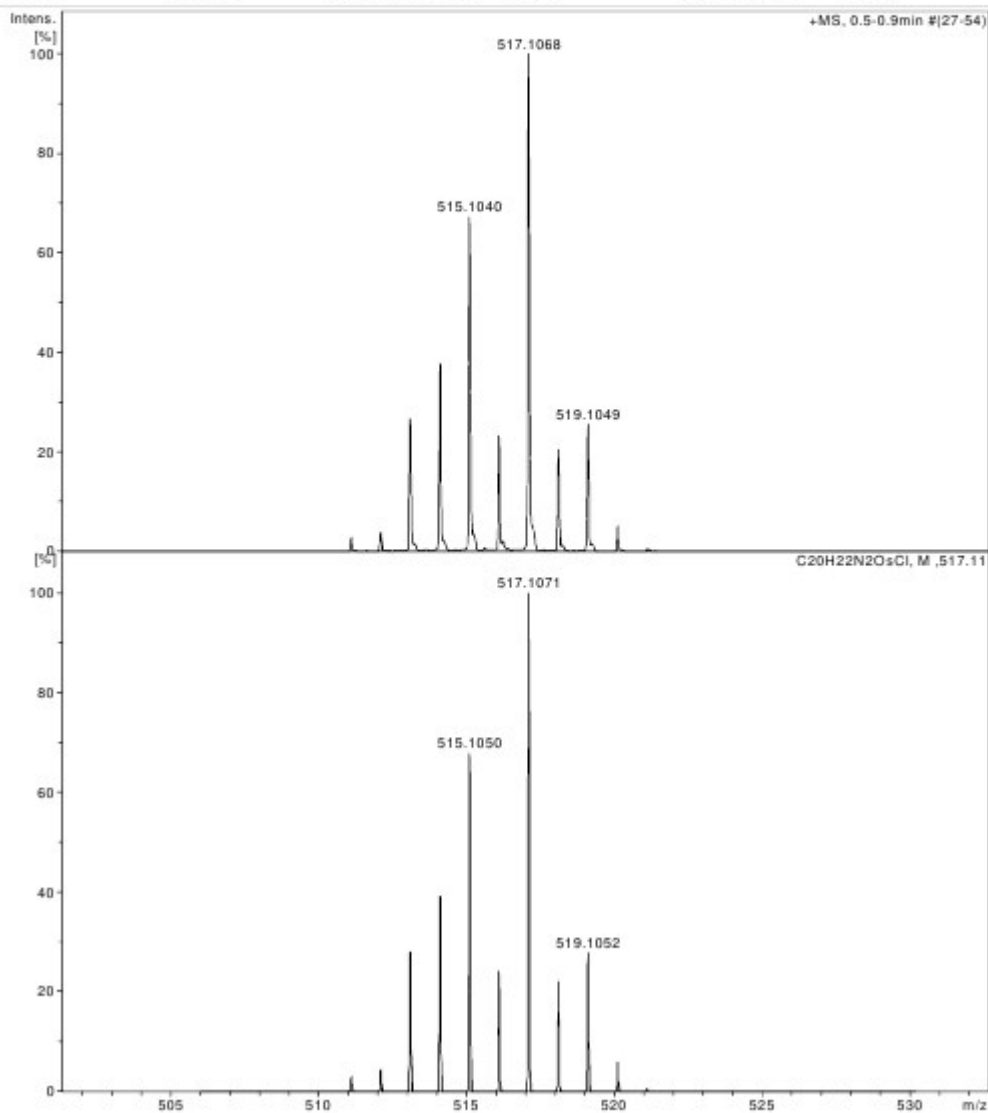

**$[(\eta^6\text{-cymene})\text{Os}(\text{Bphen})\text{Cl}]\text{Cl}$  Os4  $^1\text{H}$  NMR (400 MHz,  $\text{CD}_3\text{OD}$ )**

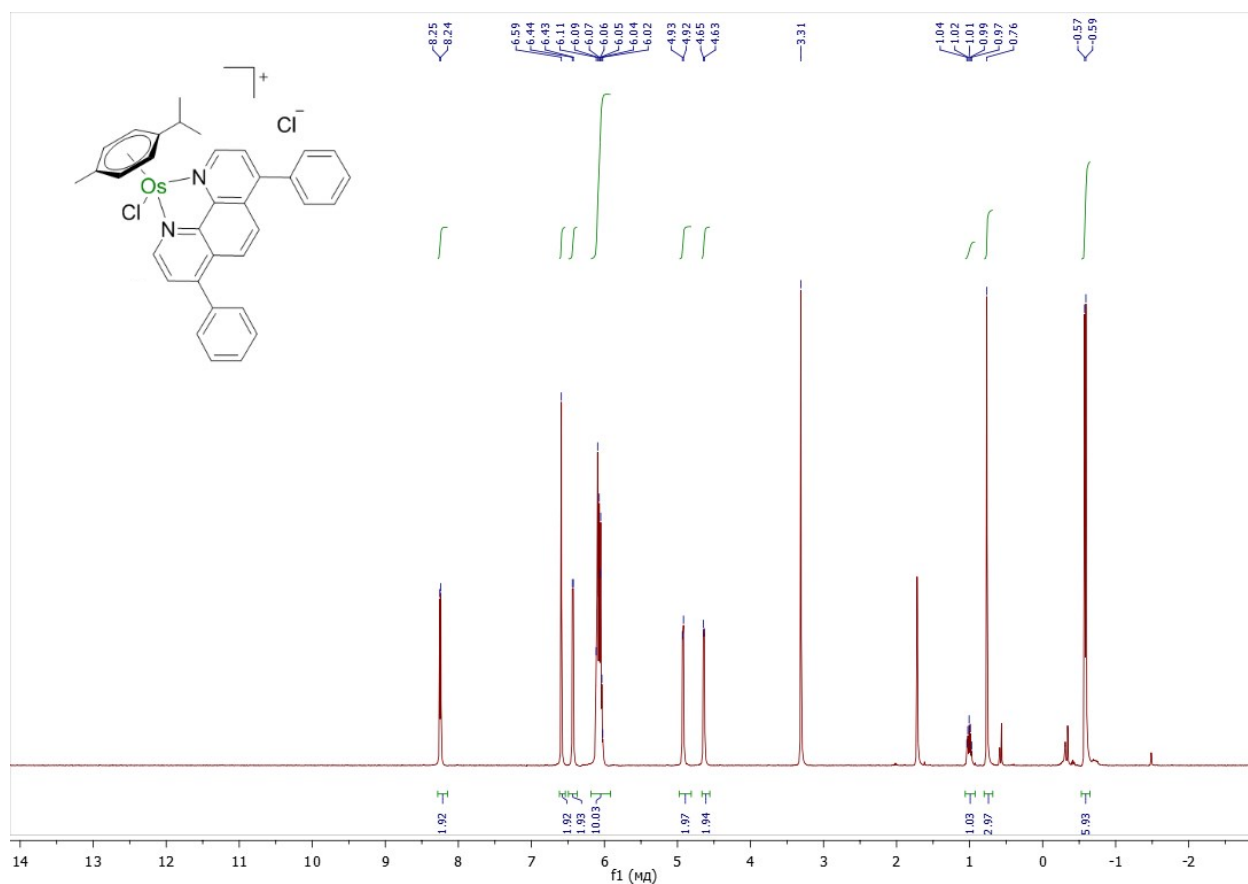

**$[(\eta^6\text{-cymene})\text{Os}(\text{Bphen})\text{Cl}]\text{Cl}$  Os4  $^{13}\text{C}$  NMR (101 MHz,  $\text{CD}_3\text{OD}$ )**

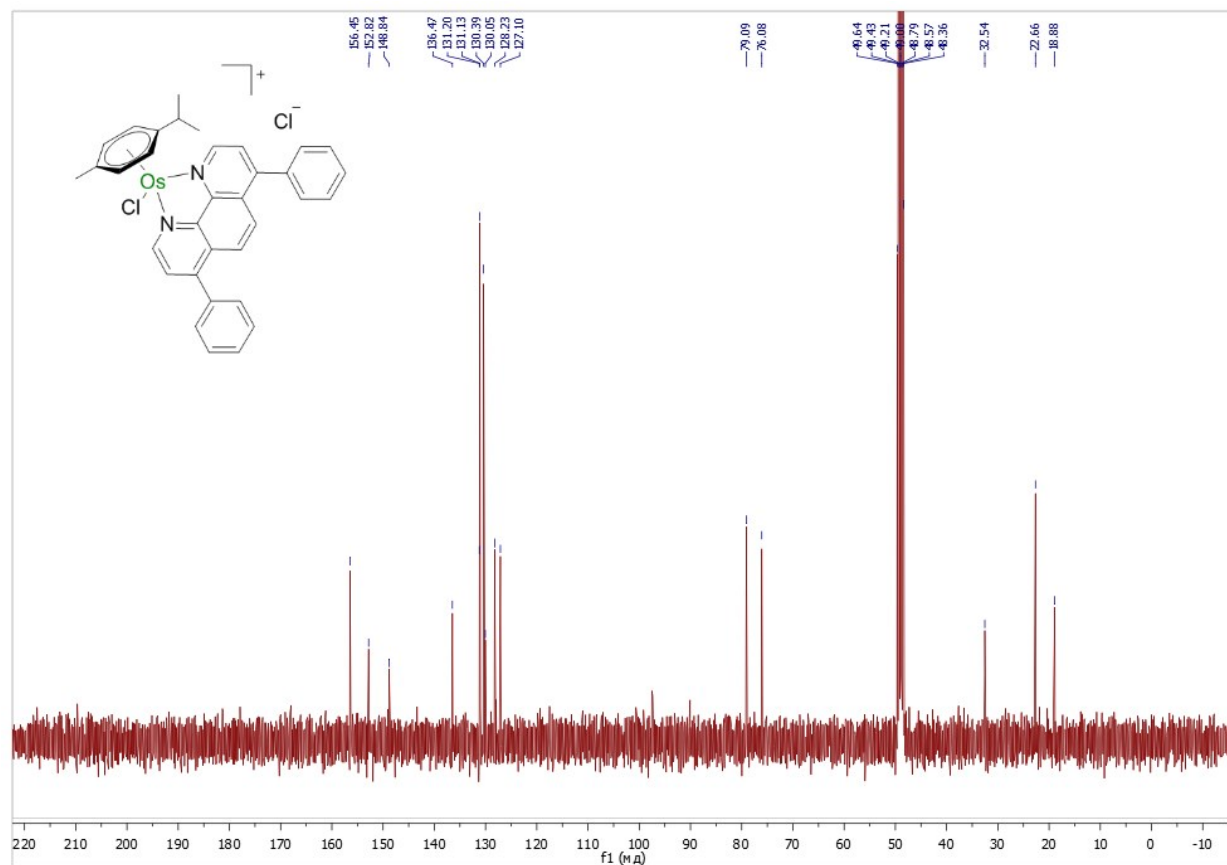

# Display Report

## Analysis Info

Analysis Name D:\Data\Kolotyrkina\2020\Loginov\1201027.d  
Method tune\_50-1600.m  
Sample Name /NGKO LD-27  
Comment C34H30CIN2Os M 693.1697 calibrant added CH3CN

Acquisition Date 01.12.2020 15:47:27

Operator BDAL@DE  
Instrument / Ser# micrOTOF 10248

## Acquisition Parameter

|             |            |                      |          |                  |           |
|-------------|------------|----------------------|----------|------------------|-----------|
| Source Type | ESI        | Ion Polarity         | Positive | Set Nebulizer    | 1.0 Bar   |
| Focus       | Not active |                      |          | Set Dry Heater   | 200 °C    |
| Scan Begin  | 50 m/z     | Set Capillary        | 4500 V   | Set Dry Gas      | 4.0 l/min |
| Scan End    | 1600 m/z   | Set End Plate Offset | -500 V   | Set Divert Valve | Waste     |

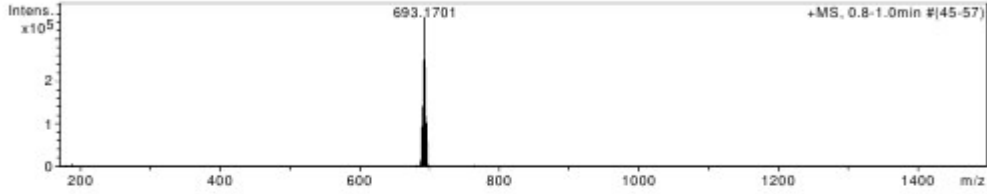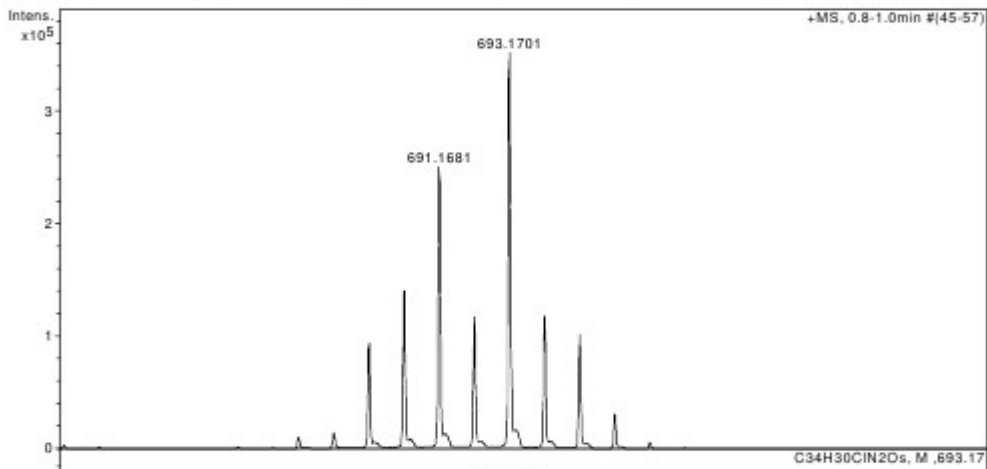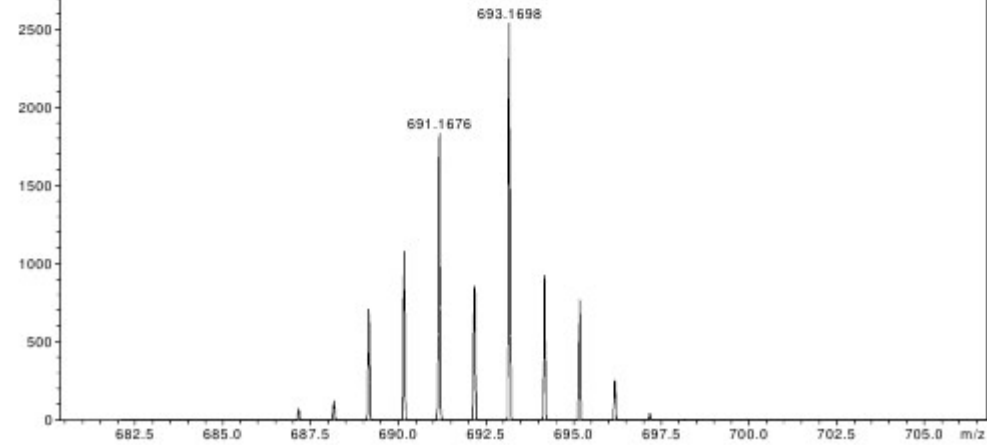

**$[(\eta^6\text{-cymene})\text{Os}(\text{Bphen})\text{Cl}]\text{BPh}_4$  Os5  $^1\text{H}$  NMR (400 MHz,  $\text{CDCl}_3$ )**

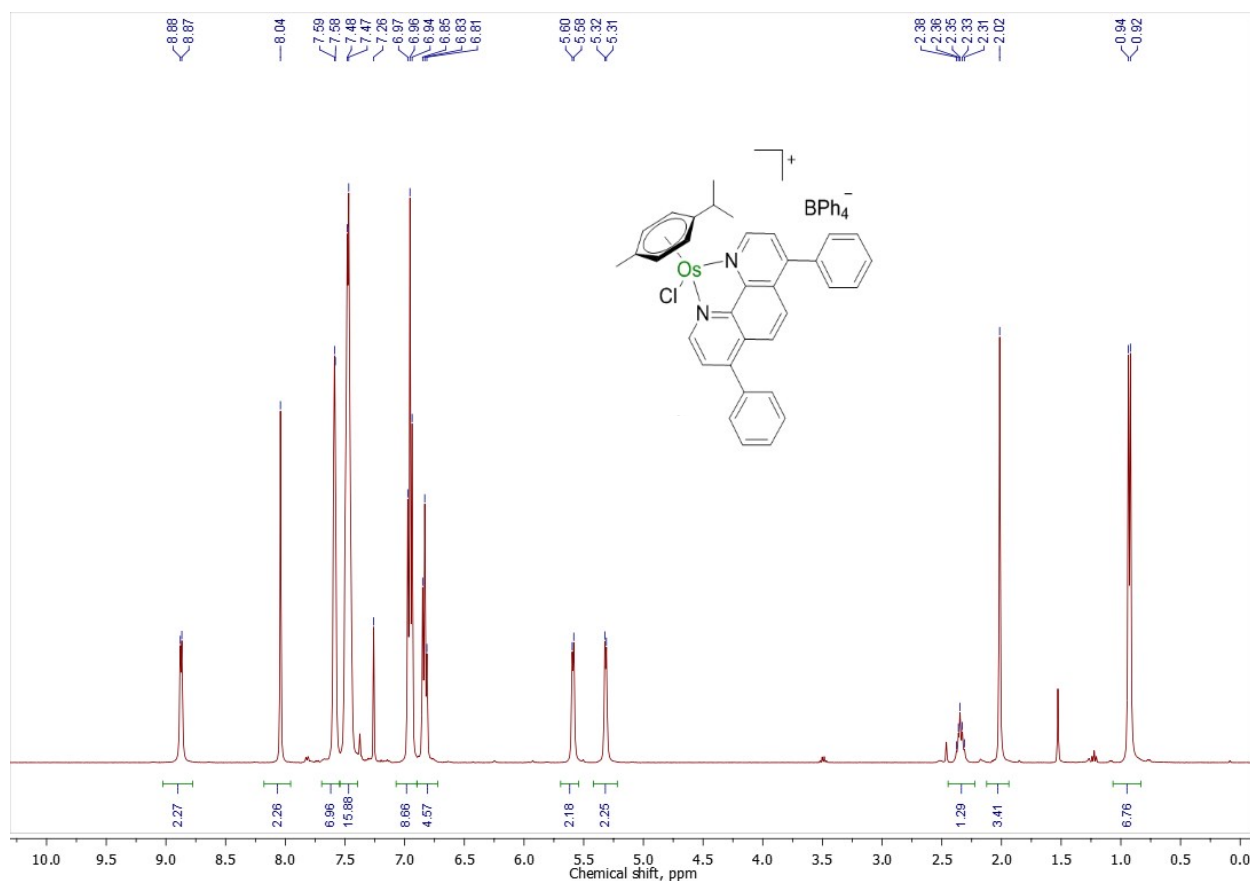

**$[(\eta^6\text{-cymene})\text{Os}(\text{Bphen})\text{Cl}]\text{BPh}_4$  Os5  $^{13}\text{C}$  NMR (101 MHz,  $\text{CDCl}_3$ )**

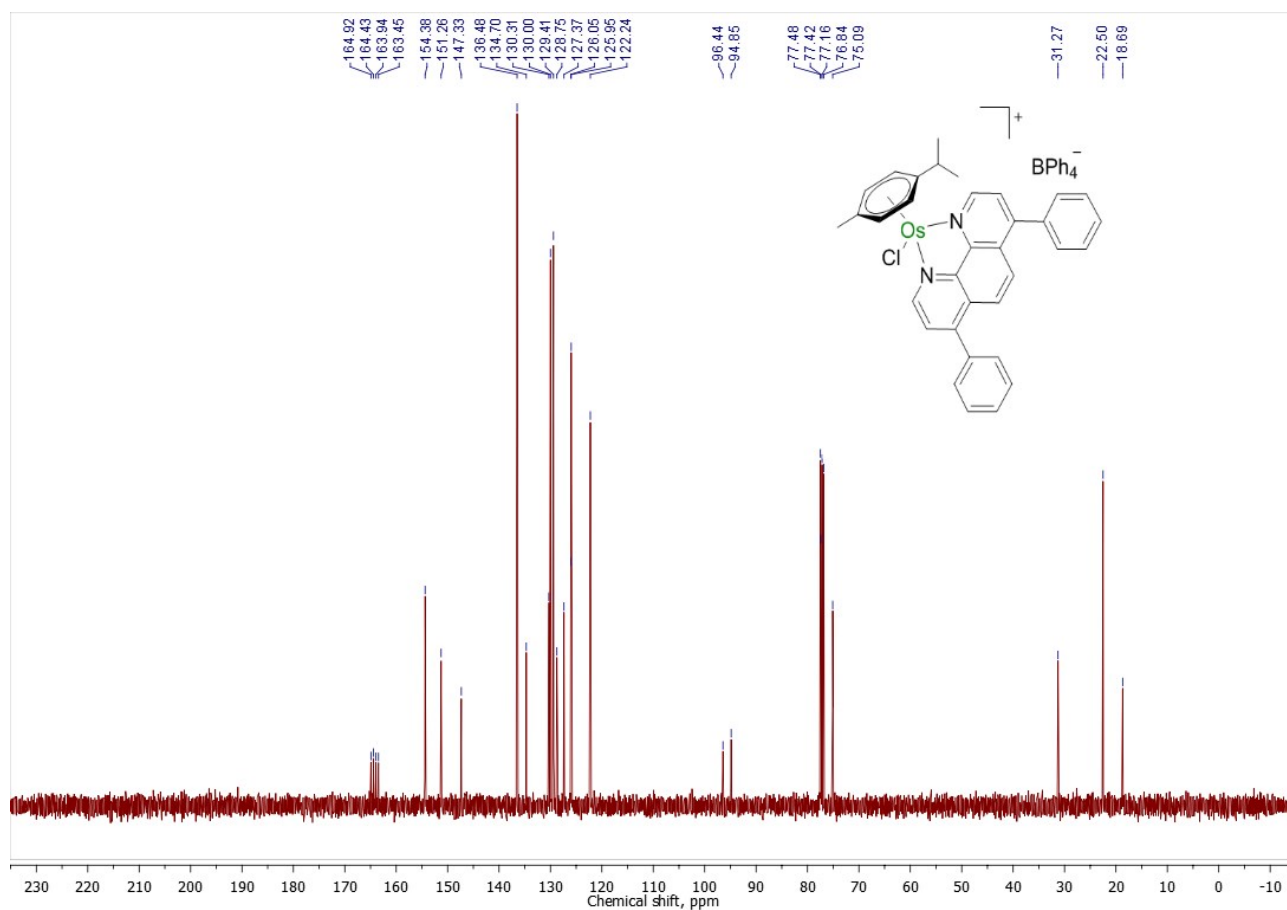

# Display Report

## Analysis Info

Analysis Name D:\Data\Kolotyrkina\2021\Loginov\0323016.d  
Method tune\_50-1600.m  
Sample Name /NGKO LD-39  
Comment C34H30N2OsCl m 693.1698 calibrant added CH3CN

Acquisition Date 23.03.2021 15:24:30

Operator BDAL@DE  
Instrument / Ser# micrOTOF 10248

## Acquisition Parameter

|             |            |                      |          |                  |           |
|-------------|------------|----------------------|----------|------------------|-----------|
| Source Type | ESI        | Ion Polarity         | Positive | Set Nebulizer    | 1.0 Bar   |
| Focus       | Not active |                      |          | Set Dry Heater   | 200 °C    |
| Scan Begin  | 50 m/z     | Set Capillary        | 4500 V   | Set Dry Gas      | 4.0 l/min |
| Scan End    | 1600 m/z   | Set End Plate Offset | -500 V   | Set Divert Valve | Waste     |

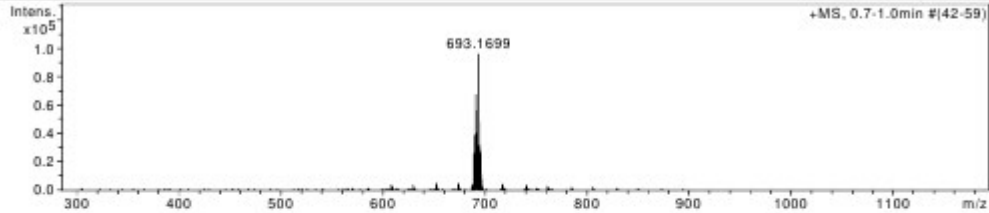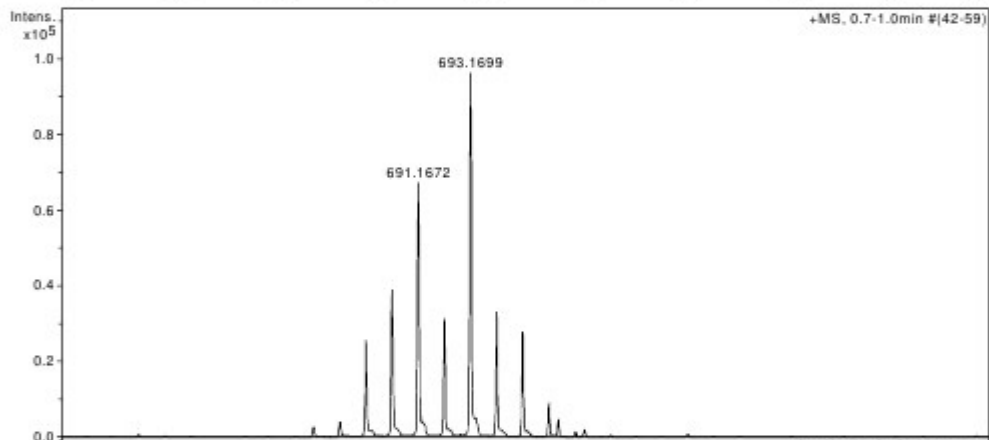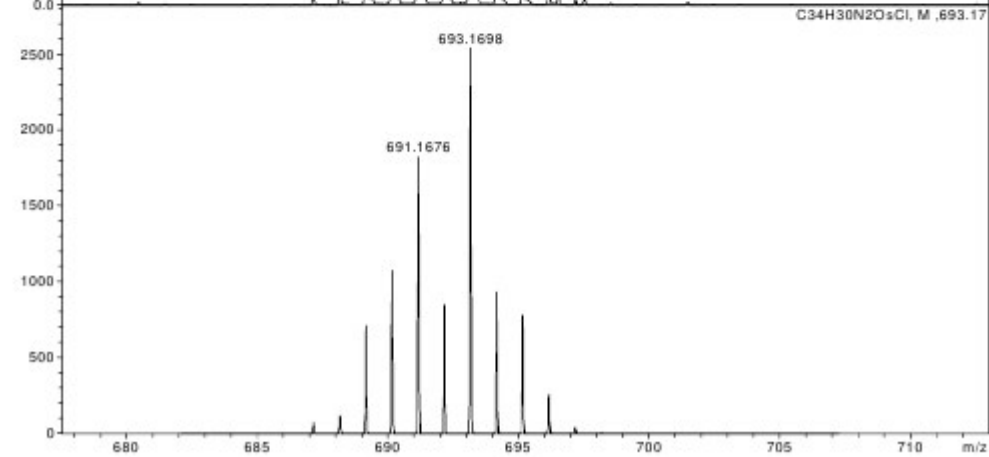



**$[(\eta^6\text{-cymene})\text{Os}(\text{Bphen})\text{I}]\text{PF}_6 \text{ Os6}$   $^1\text{H}$  NMR (400 MHz,  $\text{CDCl}_3$ )**

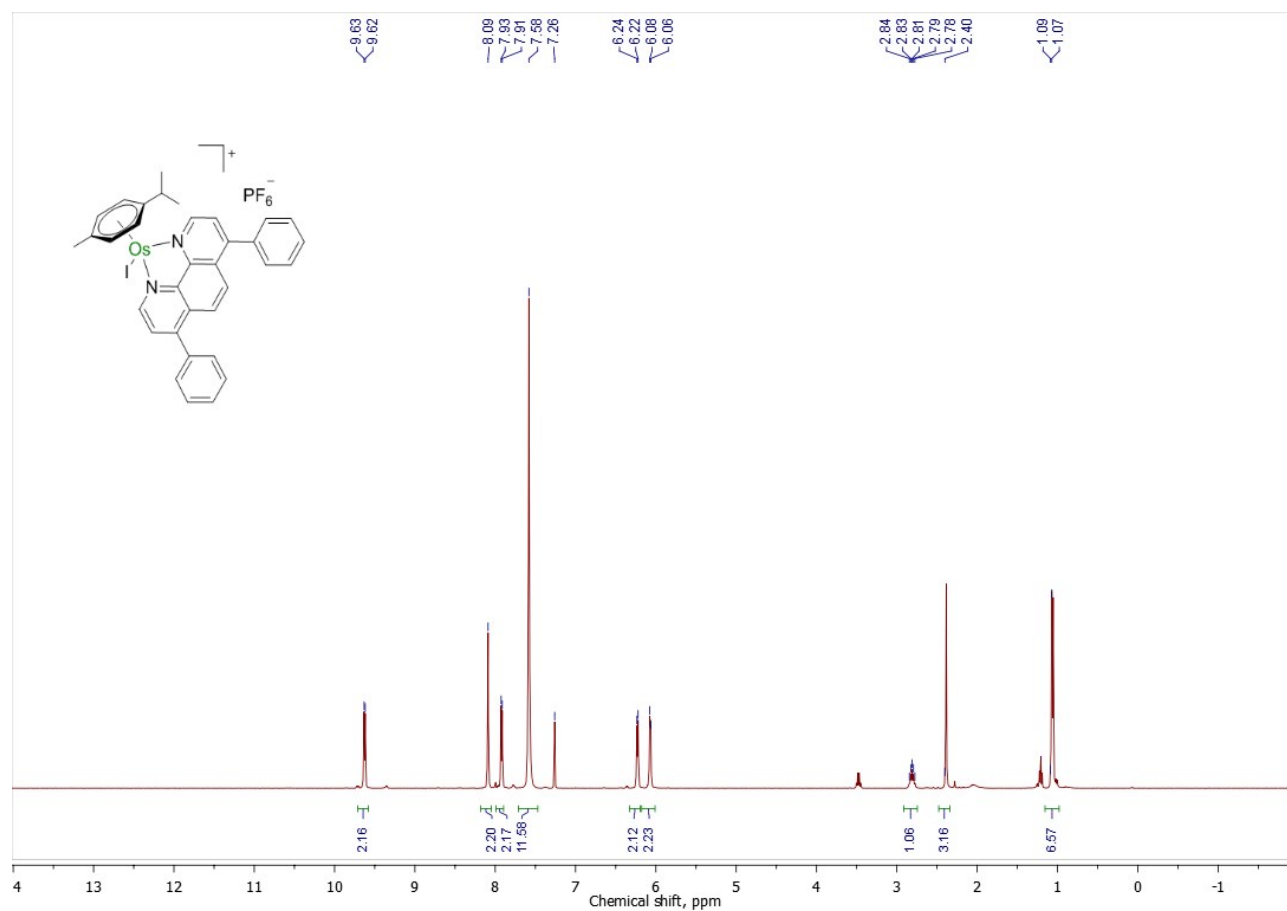

**$[(\eta^6\text{-cymene})\text{Os}(\text{Bphen})\text{I}]\text{PF}_6 \text{ Os6}$   $^{13}\text{C}$  NMR (101 MHz,  $\text{CDCl}_3$ )**

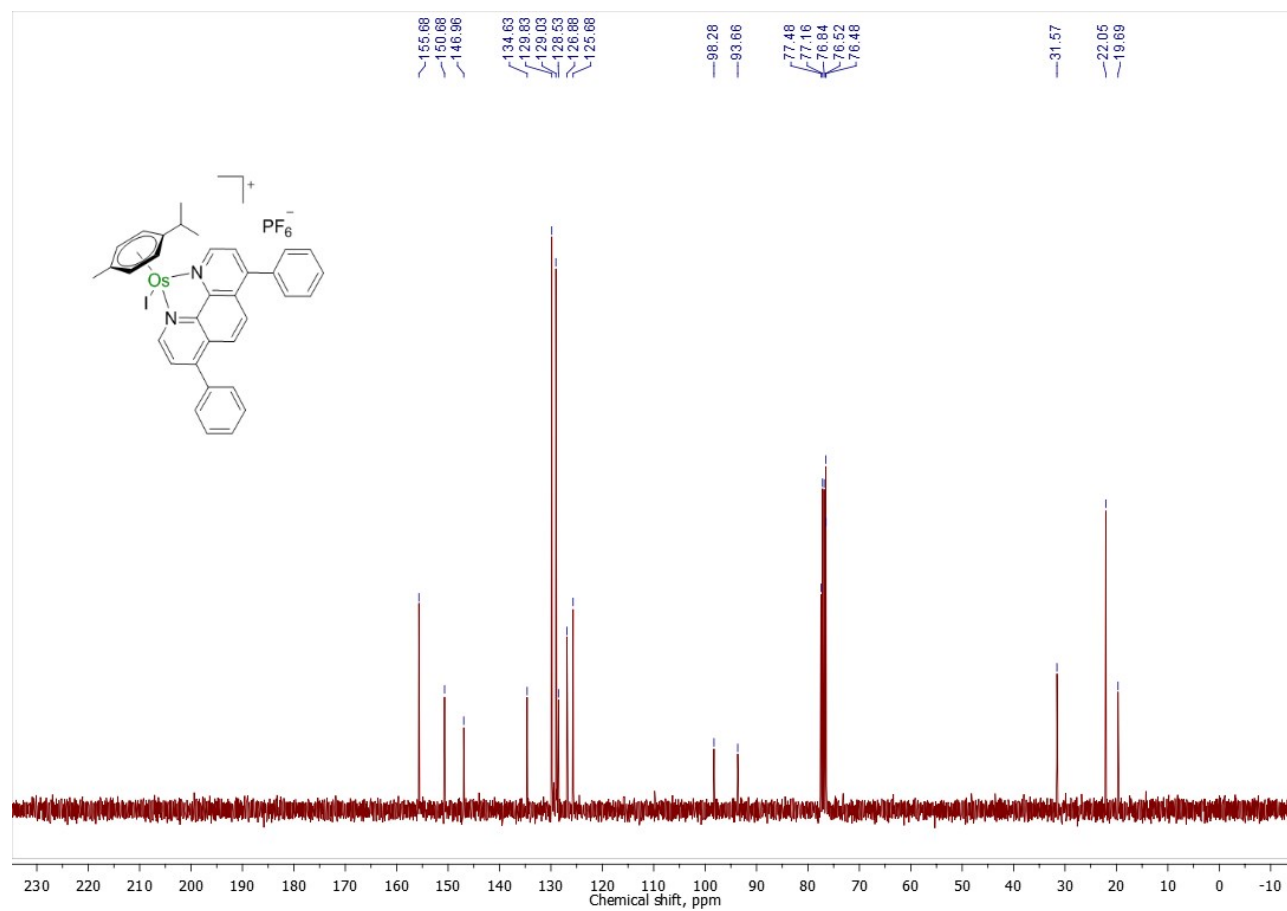

# Display Report

## Analysis Info

Analysis Name D:\Data\Kolotyrkina\2021\Loginov\0112011.d  
Method tune\_50-1600.m  
Sample Name /NGKO LG-31  
Comment C34H30N2O3I calibrant added CH3CN

Acquisition Date 12.01.2021 12:19:10

Operator BDAL@DE  
Instrument / Ser# micrOTOF 10248

## Acquisition Parameter

|             |            |                      |          |                  |           |
|-------------|------------|----------------------|----------|------------------|-----------|
| Source Type | ESI        | Ion Polarity         | Positive | Set Nebulizer    | 1.0 Bar   |
| Focus       | Not active |                      |          | Set Dry Heater   | 200 °C    |
| Scan Begin  | 50 m/z     | Set Capillary        | 4500 V   | Set Dry Gas      | 4.0 l/min |
| Scan End    | 1600 m/z   | Set End Plate Offset | -500 V   | Set Divert Valve | Waste     |

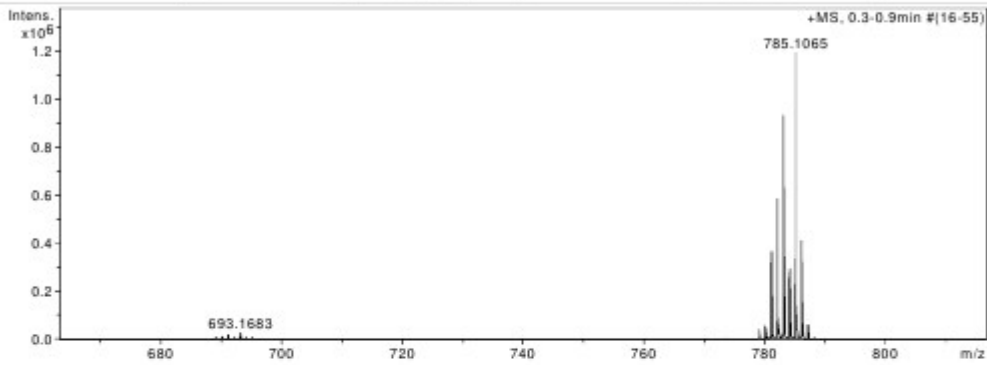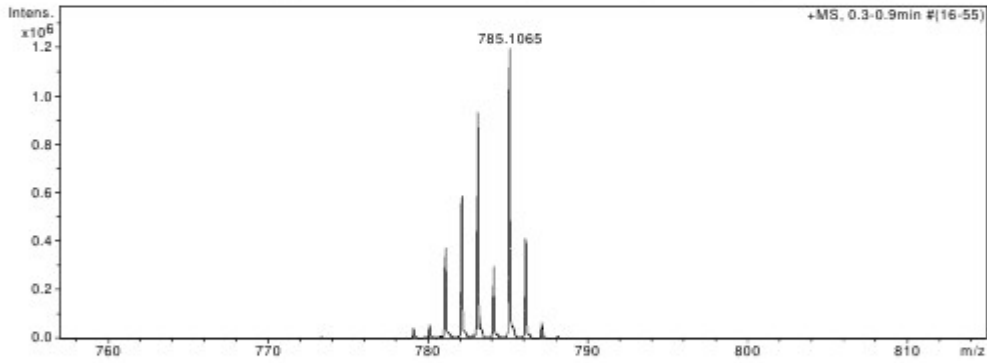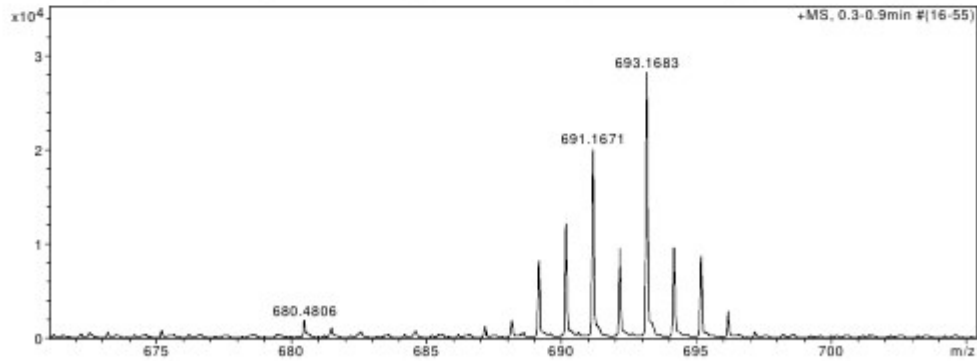

# Display Report

## Analysis Info

Analysis Name D:\Data\Kolotyrykina\2021\Loginov\0112011.d  
Method tune\_50-1600.m  
Sample Name /NGKO LG-31  
Comment C34H30N2O3I calibrant added CH3CN

Acquisition Date 12.01.2021 12:19:10

Operator BDAL@DE  
Instrument / Ser# micrOTOF 10248

## Acquisition Parameter

|             |            |                      |          |                  |           |
|-------------|------------|----------------------|----------|------------------|-----------|
| Source Type | ESI        | Ion Polarity         | Positive | Set Nebulizer    | 1.0 Bar   |
| Focus       | Not active |                      |          | Set Dry Heater   | 200 °C    |
| Scan Begin  | 50 m/z     | Set Capillary        | 4500 V   | Set Dry Gas      | 4.0 l/min |
| Scan End    | 1600 m/z   | Set End Plate Offset | -500 V   | Set Divert Valve | Waste     |

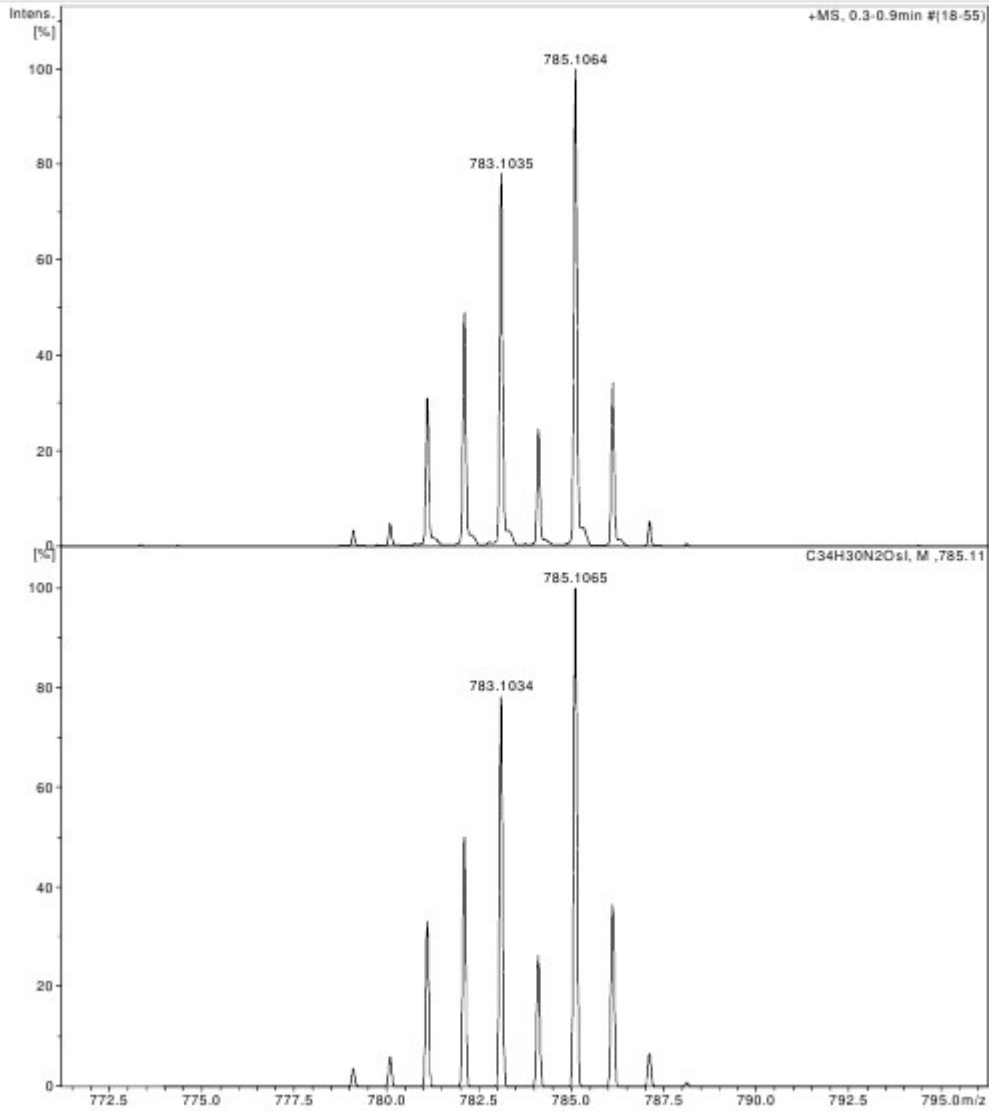

**(2,2'-bipyridine)OsCl<sub>2</sub>(CO)<sub>2</sub> Os7** <sup>1</sup>H NMR (400 MHz, CDCl<sub>3</sub>)

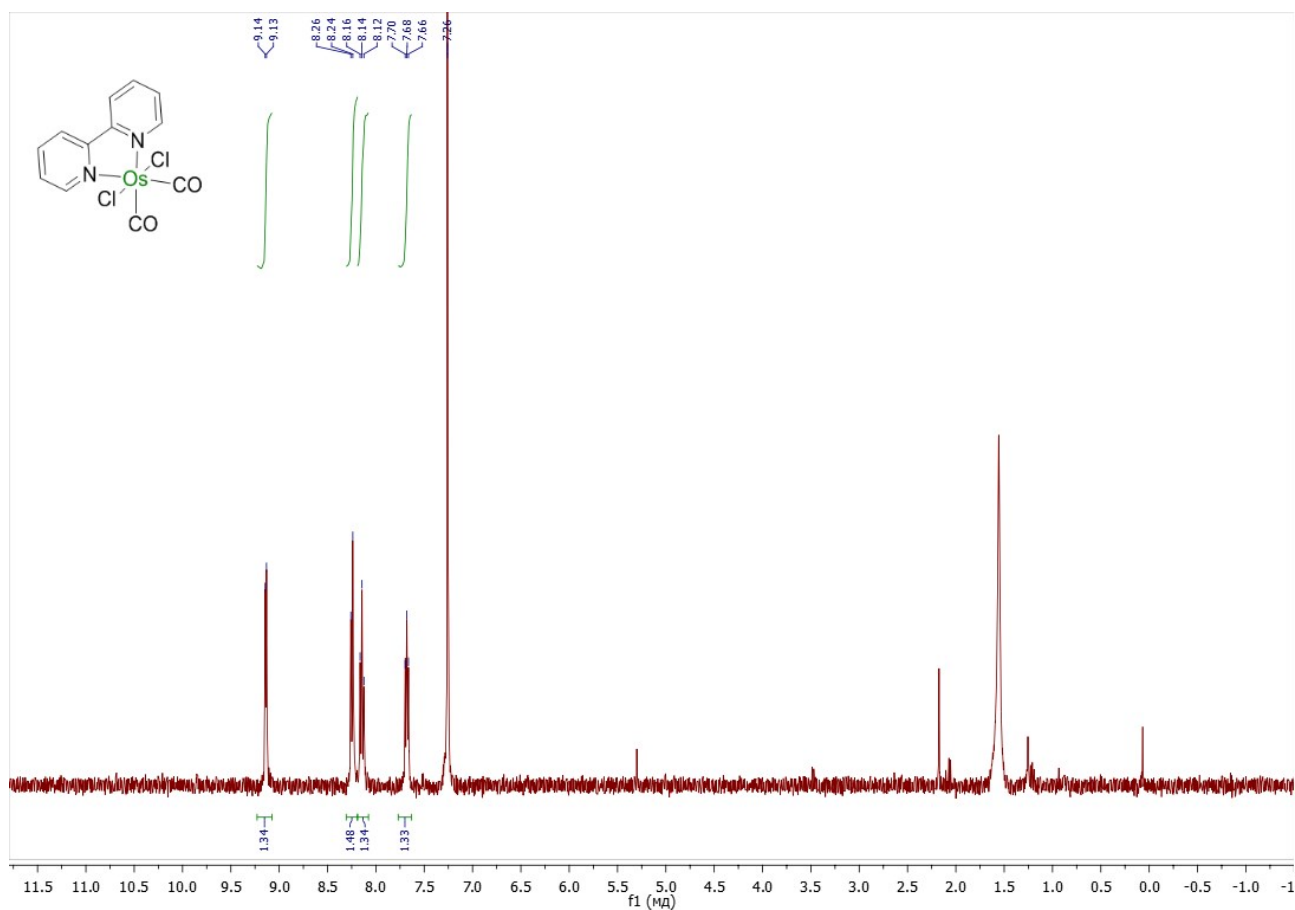

**(2,2'-bipyridine)OsCl<sub>2</sub>(CO)<sub>2</sub> Os7** <sup>13</sup>C NMR (101 MHz, CDCl<sub>3</sub>)

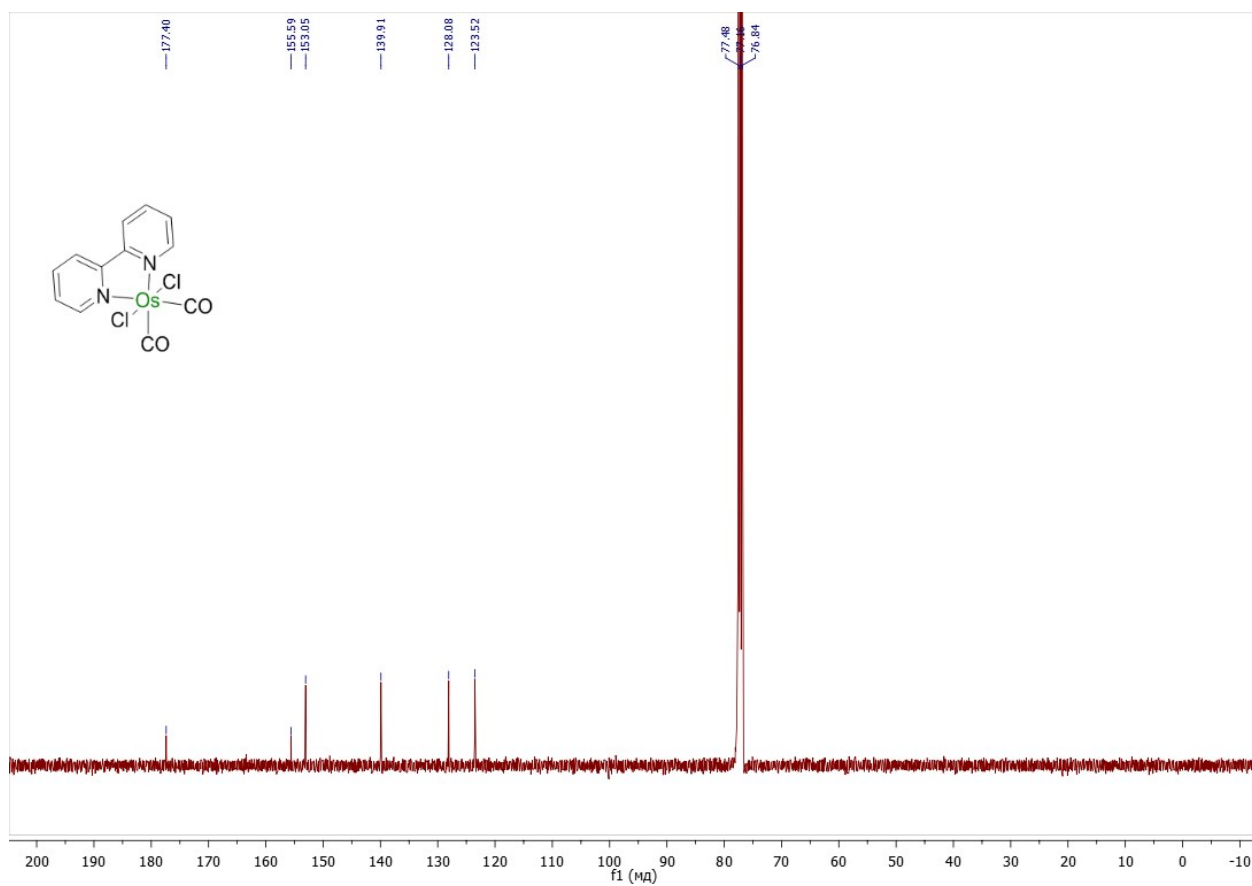

# Display Report

## Analysis Info

Analysis Name D:\Data\Kolotyrkina\2020\Loginov\1117035.d  
Method tune\_50-1600.m  
Sample Name /NGKO LD-22  
Comment C10H8ClO<sub>s</sub> mH 355.9991clb added CH<sub>3</sub>CN

Acquisition Date 17.11.2020 17:25:47

Operator BDAL@DE  
Instrument / Ser# micrOTOF 10248

## Acquisition Parameter

|             |            |                      |          |                  |           |
|-------------|------------|----------------------|----------|------------------|-----------|
| Source Type | ESI        | Ion Polarity         | Positive | Set Nebulizer    | 1.0 Bar   |
| Focus       | Not active |                      |          | Set Dry Heater   | 200 °C    |
| Scan Begin  | 50 m/z     | Set Capillary        | 4500 V   | Set Dry Gas      | 4.0 l/min |
| Scan End    | 1600 m/z   | Set End Plate Offset | -500 V   | Set Divert Valve | Waste     |

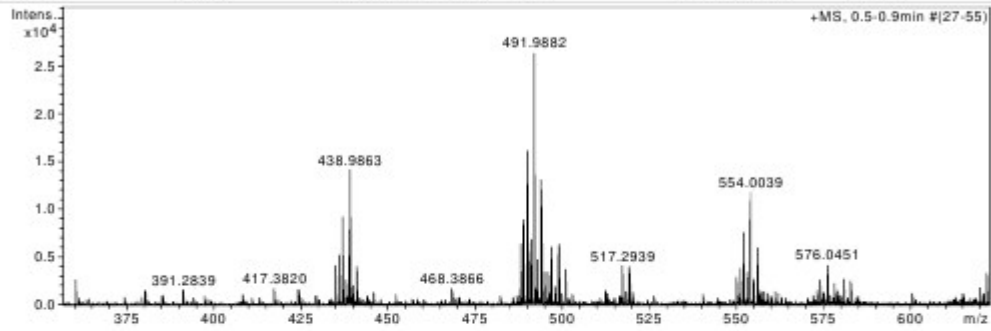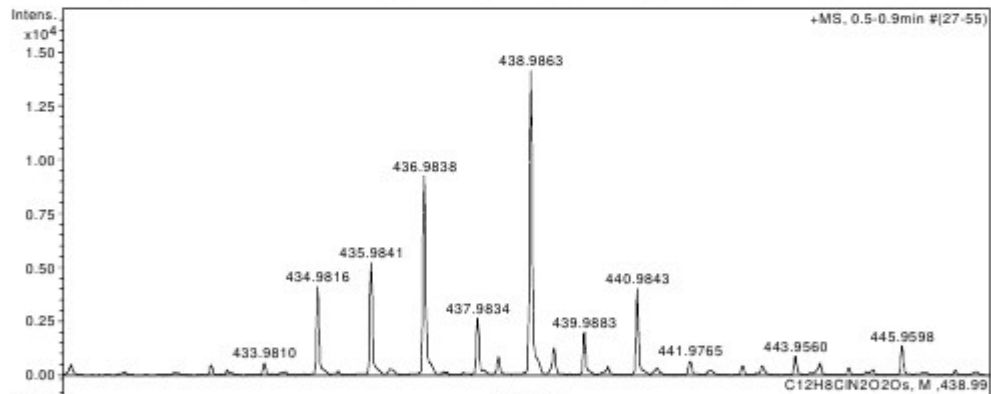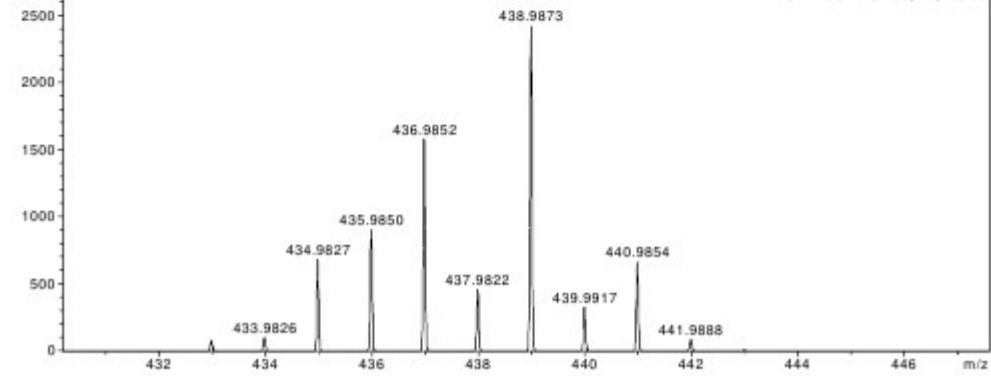

# Display Report

## Analysis Info

Analysis Name D:\Data\Kolotyrykina\2020\Loginov\1117035.d  
Method tune\_50-1600.m  
Sample Name /NGKO LD-22  
Comment C10H8ClO<sub>s</sub> mH 355.9991clb added CH3CN

Acquisition Date 17.11.2020 17:25:47

Operator BDAL@DE  
Instrument / Ser# micrOTOF 10248

## Acquisition Parameter

|             |            |                      |          |                  |           |
|-------------|------------|----------------------|----------|------------------|-----------|
| Source Type | ESI        | Ion Polarity         | Positive | Set Nebulizer    | 1.0 Bar   |
| Focus       | Not active |                      |          | Set Dry Heater   | 200 °C    |
| Scan Begin  | 50 m/z     | Set Capillary        | 4500 V   | Set Dry Gas      | 4.0 l/min |
| Scan End    | 1600 m/z   | Set End Plate Offset | -500 V   | Set Divert Valve | Waste     |

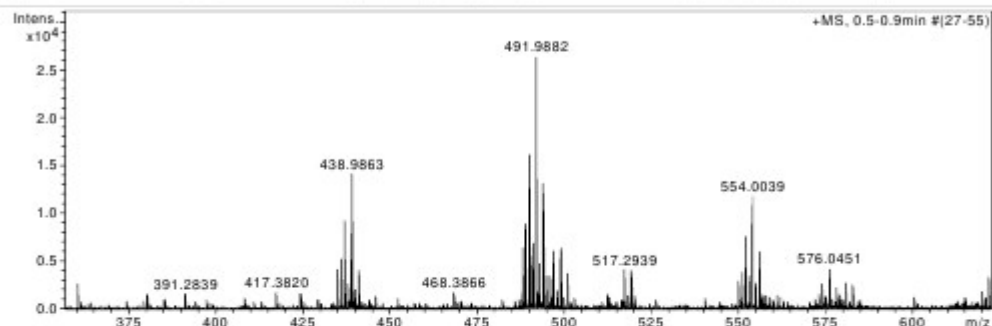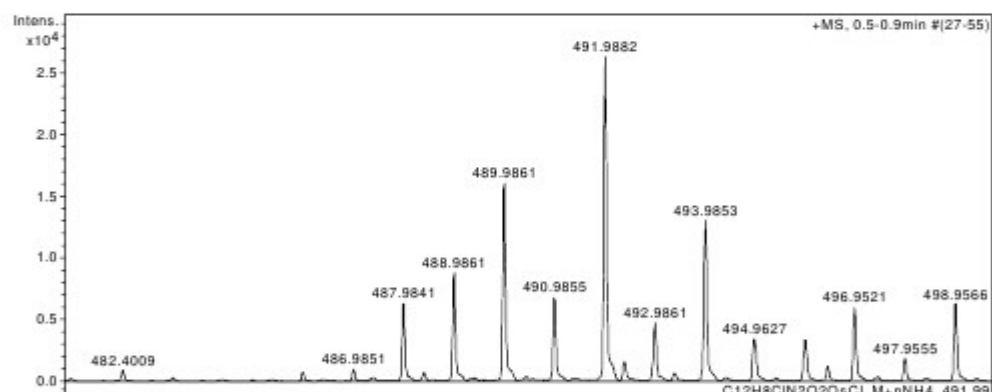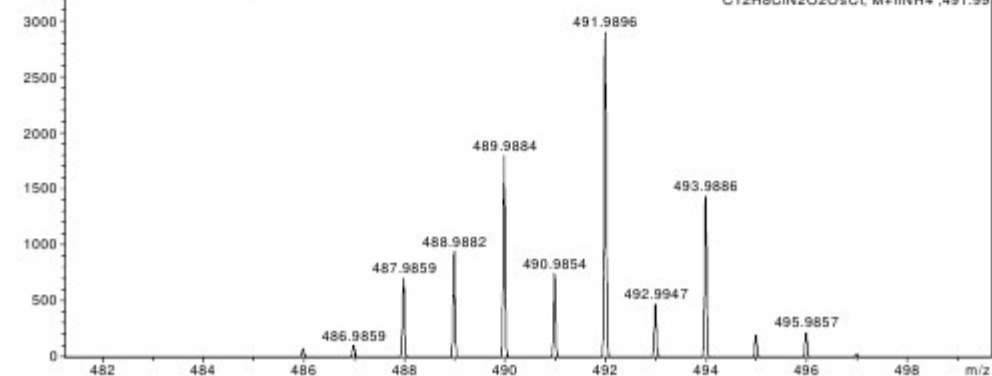

**(Bphen)OsCl<sub>2</sub>(CO)<sub>2</sub> Os8** <sup>1</sup>H NMR (400 MHz, CDCl<sub>3</sub>)

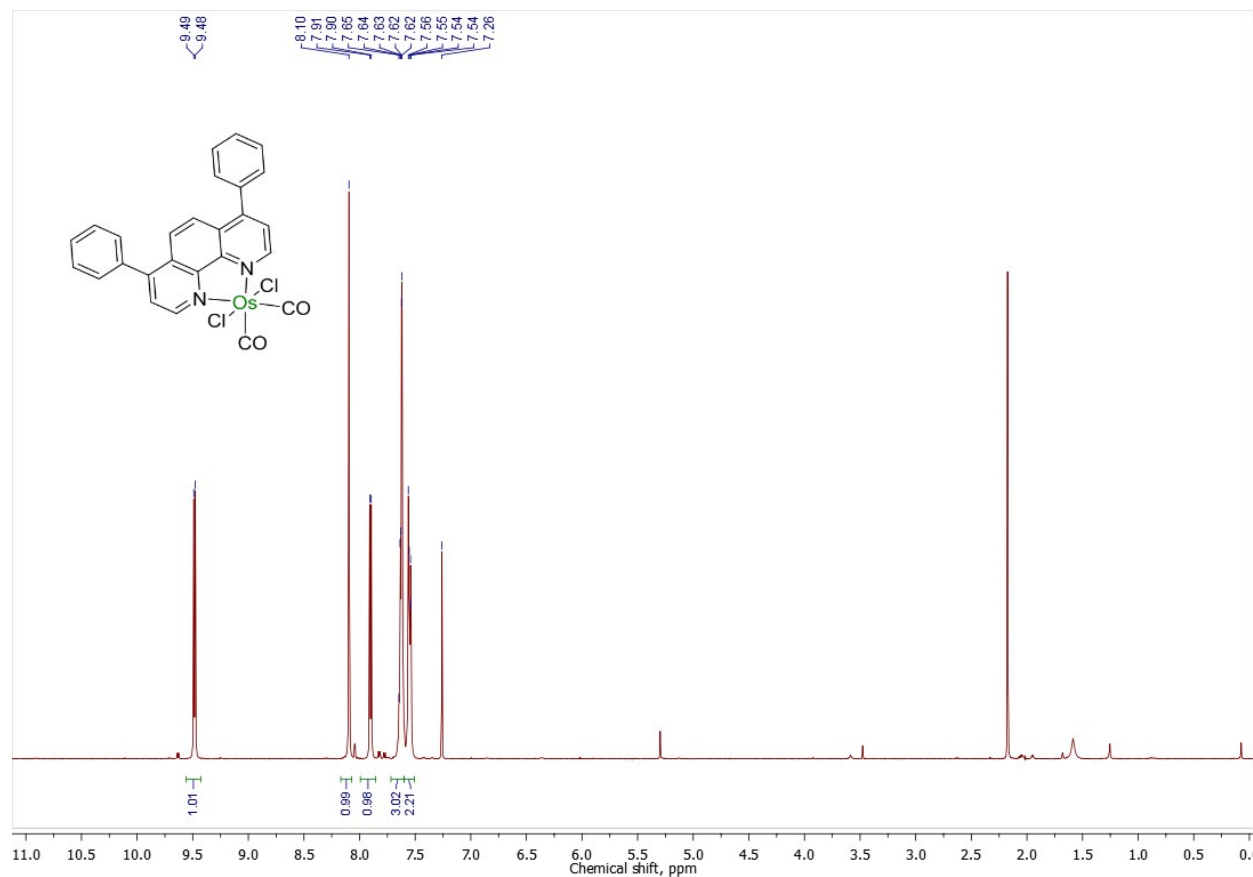

**(Bphen)OsCl<sub>2</sub>(CO)<sub>2</sub> Os8** <sup>13</sup>C NMR (101 MHz, CDCl<sub>3</sub>)

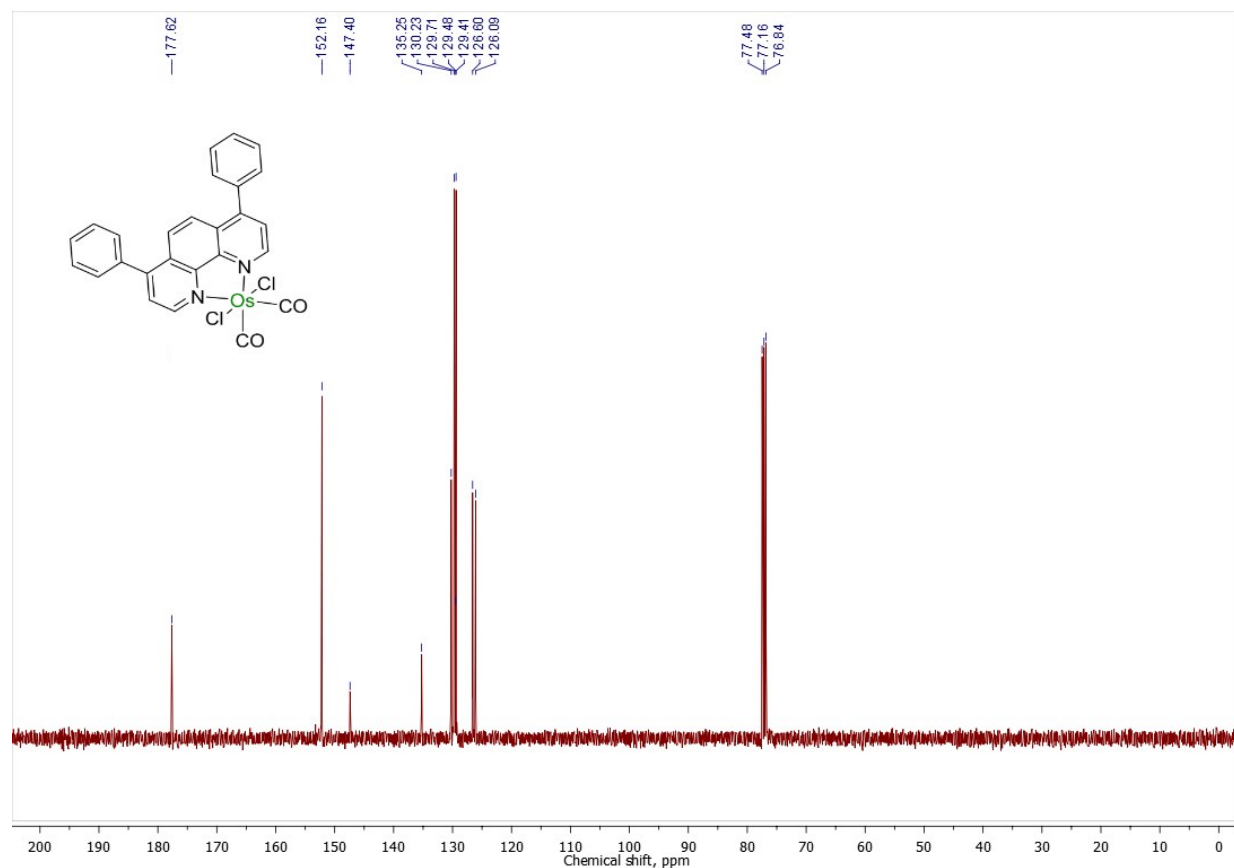

# Display Report

**Analysis Info**

Analysis Name D:\Data\Kolotyrkina\2020\Loginov\1201026.d  
 Method tune\_50-1600.m  
 Sample Name /NGKO LD-26  
 Comment C26H16Cl2O2Os M 622.0117 calibrant added CH3CN

Acquisition Date 01.12.2020 15:39:09

Operator BDAL@DE  
 Instrument / Ser# micrOTOF 10248

**Acquisition Parameter**

|             |            |                      |          |                  |           |
|-------------|------------|----------------------|----------|------------------|-----------|
| Source Type | ESI        | Ion Polarity         | Positive | Set Nebulizer    | 1.0 Bar   |
| Focus       | Not active |                      |          | Set Dry Heater   | 200 °C    |
| Scan Begin  | 50 m/z     | Set Capillary        | 4500 V   | Set Dry Gas      | 4.0 l/min |
| Scan End    | 1600 m/z   | Set End Plate Offset | -500 V   | Set Divert Valve | Waste     |

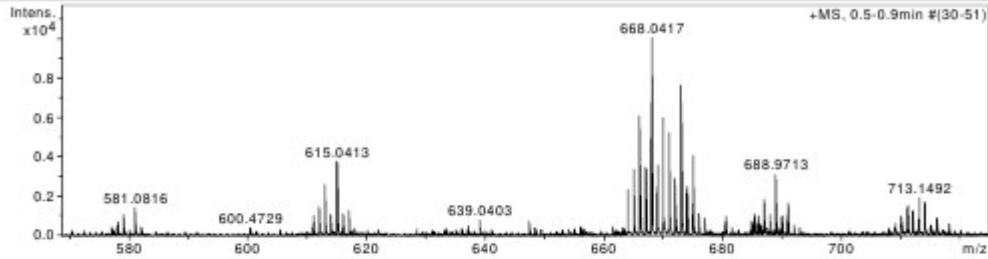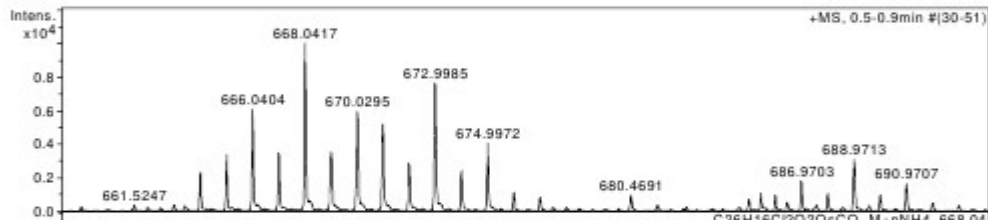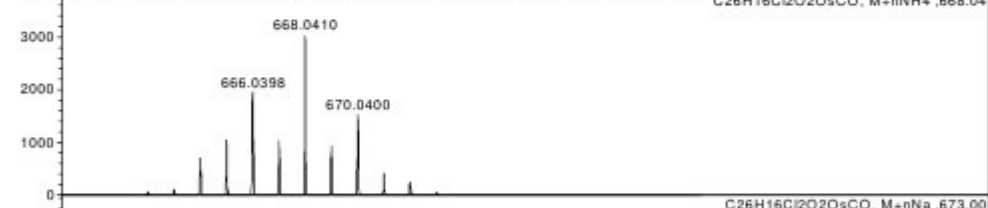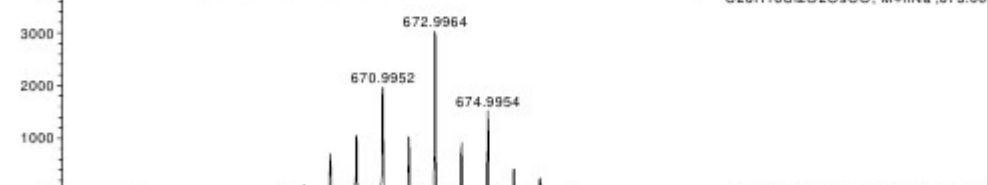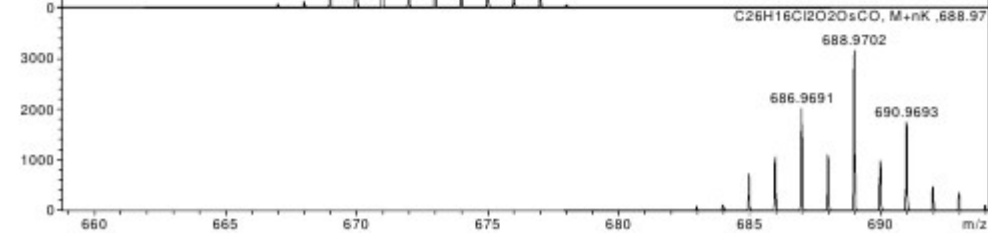



(2,2'-bipyridine)<sub>2</sub>OsCl<sub>2</sub> Os9 <sup>1</sup>H NMR (300 MHz, CD<sub>2</sub>Cl<sub>2</sub>)

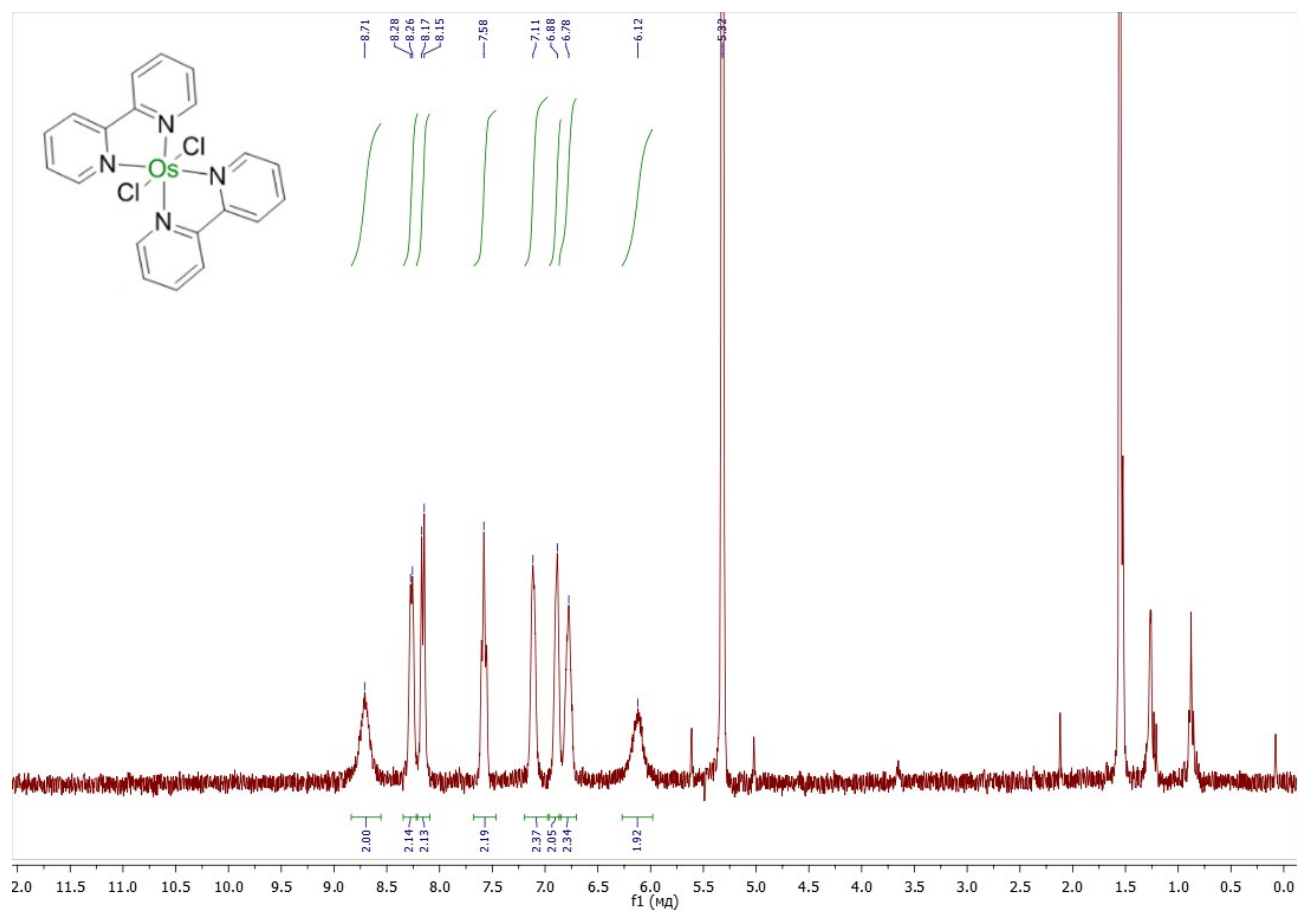

# Display Report

## Analysis Info

Analysis Name D:\Data\Kolotyrkina\2020\Loginov\1124031.d  
Method tune\_50-1600.m  
Sample Name /NGKO LD-24  
Comment C20H16Cl2N4Os m 518.0218 calibrant added CH3CN

Acquisition Date 24.11.2020 17:03:08

Operator BDAL@DE  
Instrument / Ser# micrOTOF 10248

## Acquisition Parameter

|             |            |                      |          |                  |           |
|-------------|------------|----------------------|----------|------------------|-----------|
| Source Type | ESI        | Ion Polarity         | Positive | Set Nebulizer    | 1.0 Bar   |
| Focus       | Not active |                      |          | Set Dry Heater   | 200 °C    |
| Scan Begin  | 50 m/z     | Set Capillary        | 4500 V   | Set Dry Gas      | 4.0 l/min |
| Scan End    | 1600 m/z   | Set End Plate Offset | -500 V   | Set Divert Valve | Waste     |

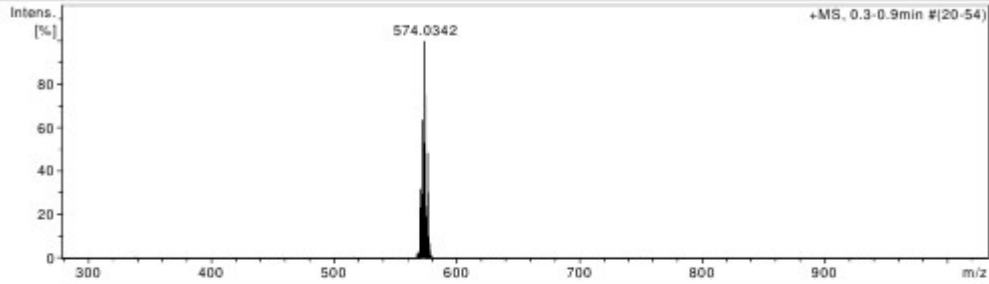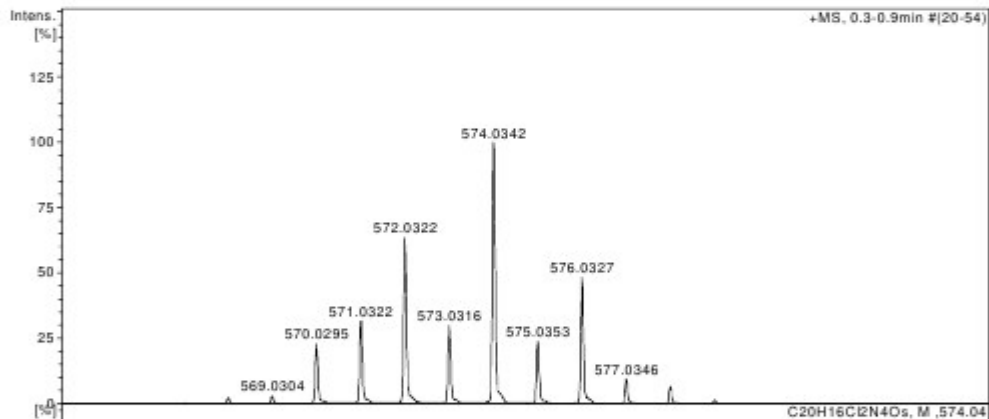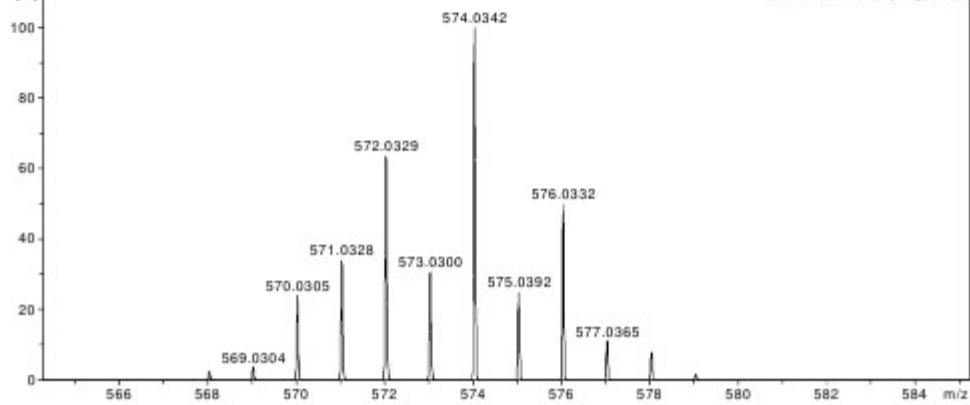

(2,2'-bipyridine)<sub>2</sub>OsCl<sub>3</sub> Os10 <sup>1</sup>H NMR (400 MHz, CD<sub>3</sub>OD)

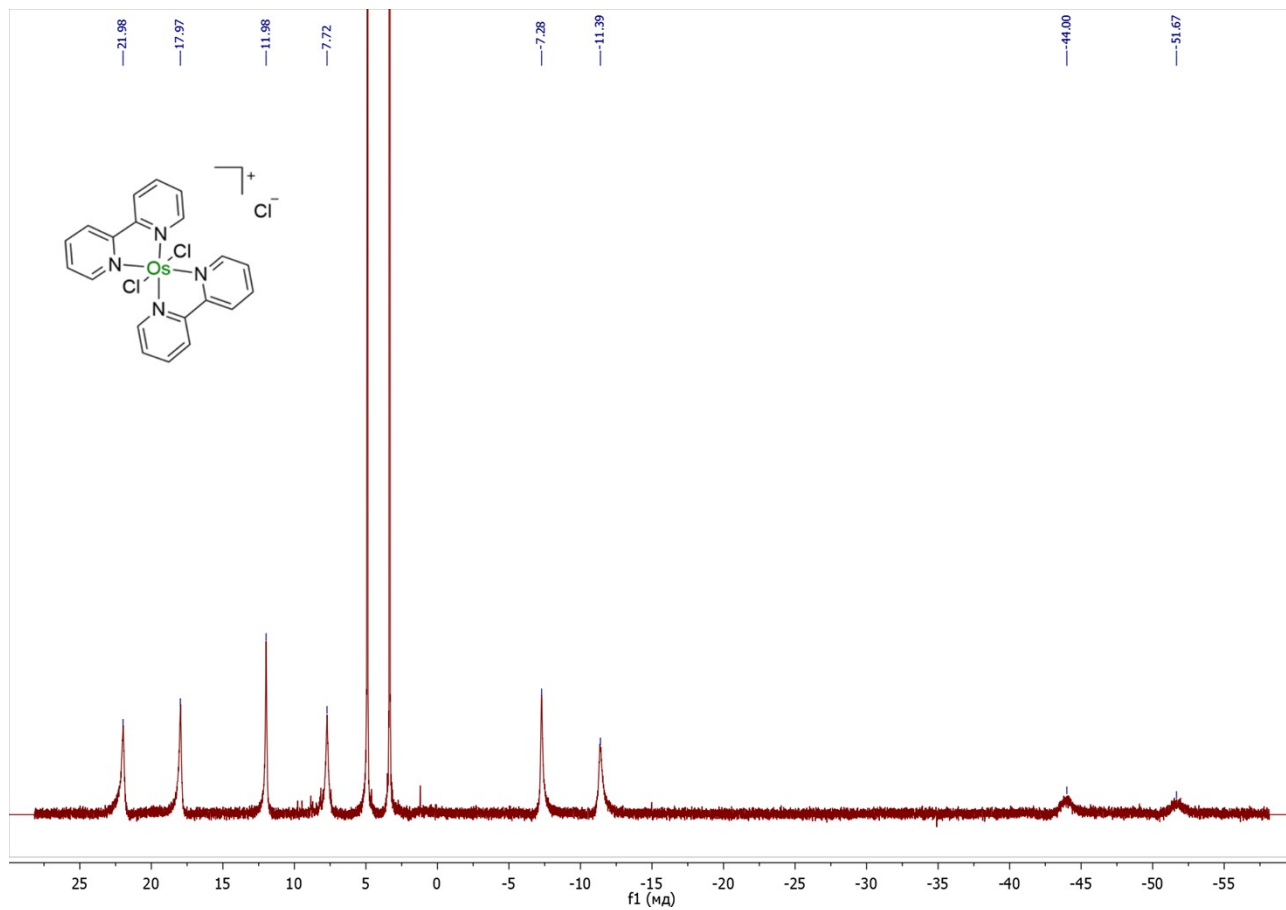

# Display Report

## Analysis Info

Analysis Name D:\Data\Kolotyrkina\2021\Loginov\0119026.d  
Method tune\_50-1600.m  
Sample Name /NGKO LD-33  
Comment C20H16N4Cl2Os calibrant added CH3CN

Acquisition Date 19.01.2021 13:30:09

Operator BDAL@DE  
Instrument / Ser# micrOTOF 10248

## Acquisition Parameter

|             |            |                      |          |                  |           |
|-------------|------------|----------------------|----------|------------------|-----------|
| Source Type | ESI        | Ion Polarity         | Positive | Set Nebulizer    | 1.0 Bar   |
| Focus       | Not active |                      |          | Set Dry Heater   | 200 °C    |
| Scan Begin  | 50 m/z     | Set Capillary        | 4500 V   | Set Dry Gas      | 4.0 l/min |
| Scan End    | 1600 m/z   | Set End Plate Offset | -500 V   | Set Divert Valve | Waste     |

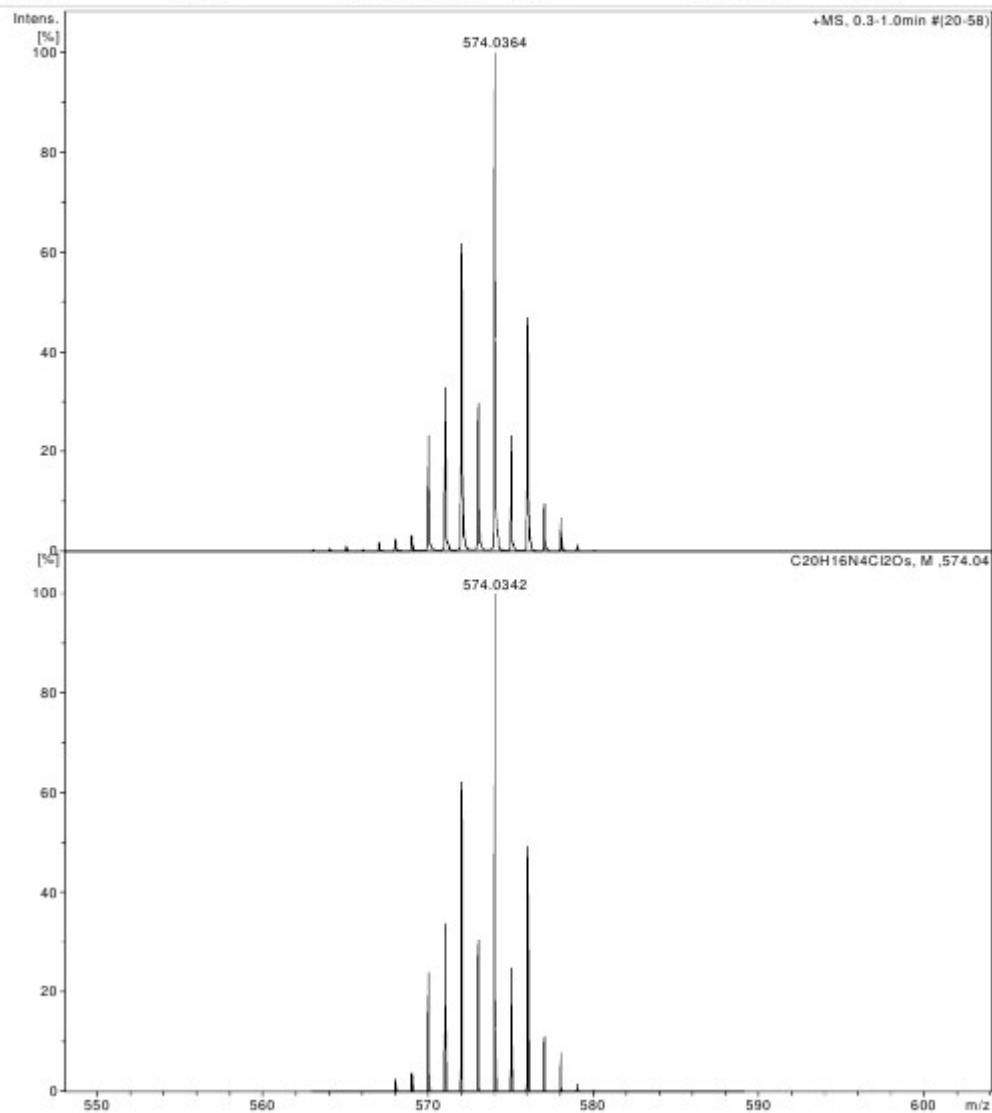

**[( $\eta^6$ -cymene)Os(N,C-napht)Cl] Os11**  $^1\text{H}$  NMR (400 MHz,  $\text{CDCl}_3$ )

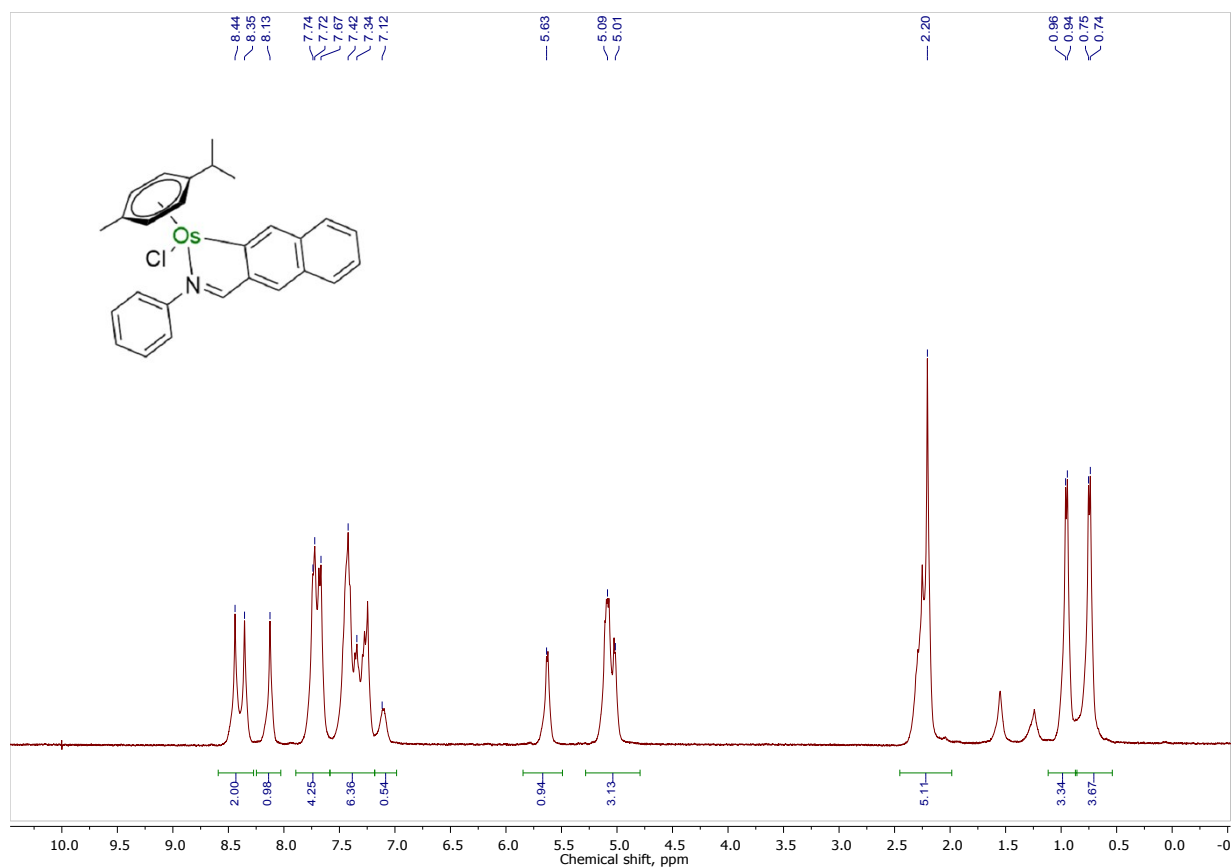

**[( $\eta^6$ -cymene)Os(N,C-napht)Cl] Os11**  $^{13}\text{C}$  NMR (101 MHz,  $\text{CDCl}_3$ )

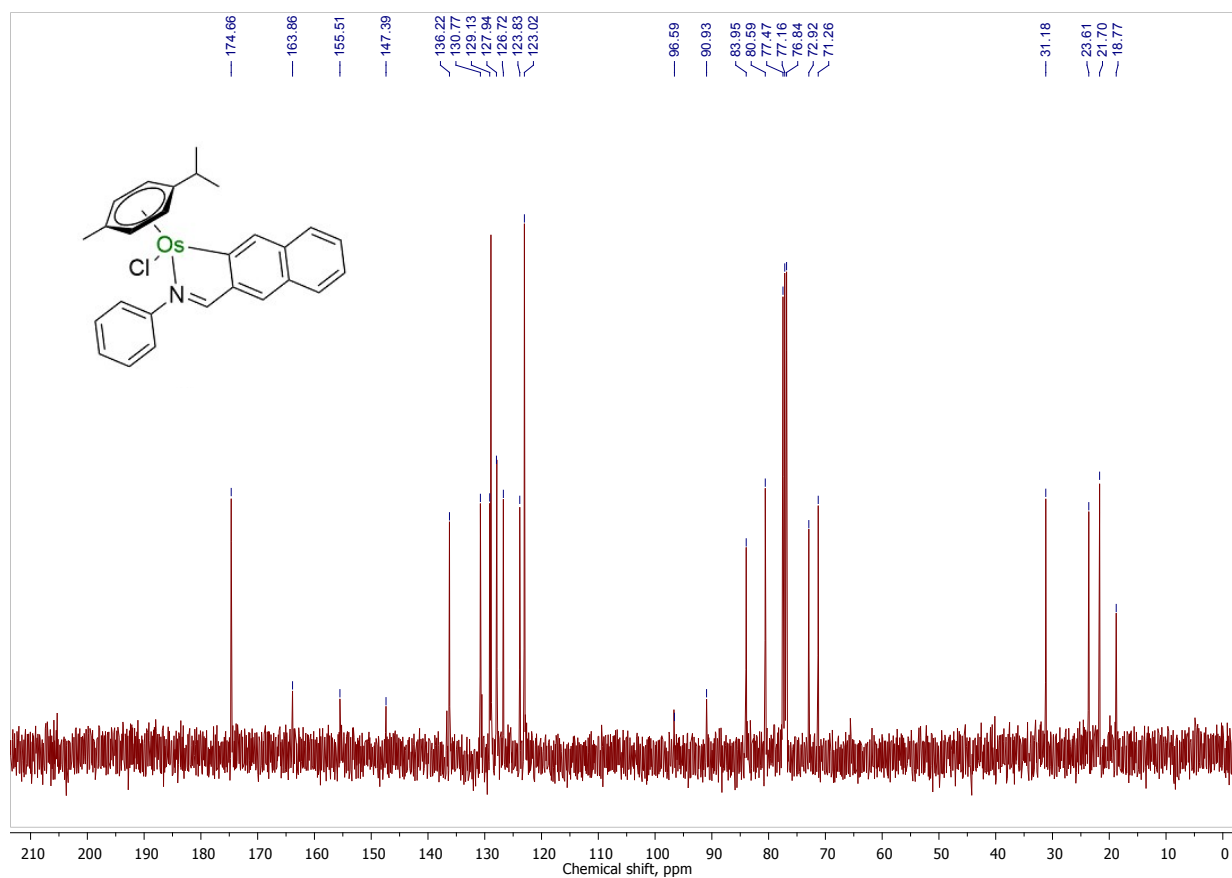

# Display Report

## Analysis Info

Analysis Name D:\Data\Kolotyrkina\2020\Loginov\1208041.d  
Method tune\_50-1800.m  
Sample Name /NGKO LD-29  
Comment C27H26NOsCl calibrant added CH3CN

Acquisition Date 08.12.2020 16:50:53

Operator BDAL@DE  
Instrument / Ser# micrOTOF 10248

## Acquisition Parameter

|             |            |                      |          |                  |           |
|-------------|------------|----------------------|----------|------------------|-----------|
| Source Type | ESI        | Ion Polarity         | Positive | Set Nebulizer    | 1.0 Bar   |
| Focus       | Not active |                      |          | Set Dry Heater   | 200 °C    |
| Scan Begin  | 50 m/z     | Set Capillary        | 4500 V   | Set Dry Gas      | 4.0 l/min |
| Scan End    | 1600 m/z   | Set End Plate Offset | -500 V   | Set Divert Valve | Waste     |

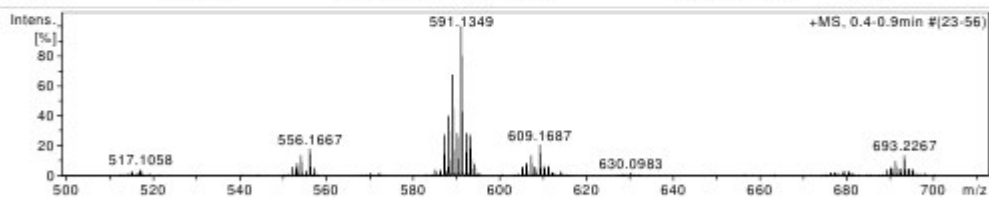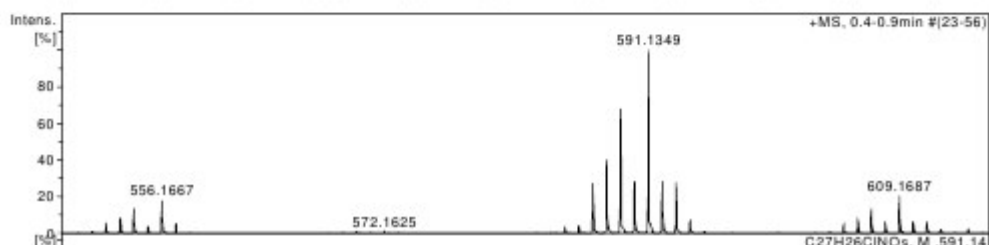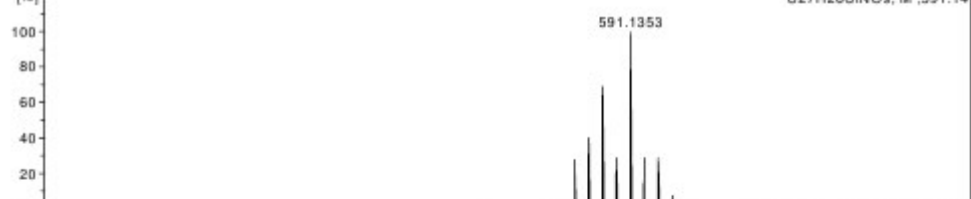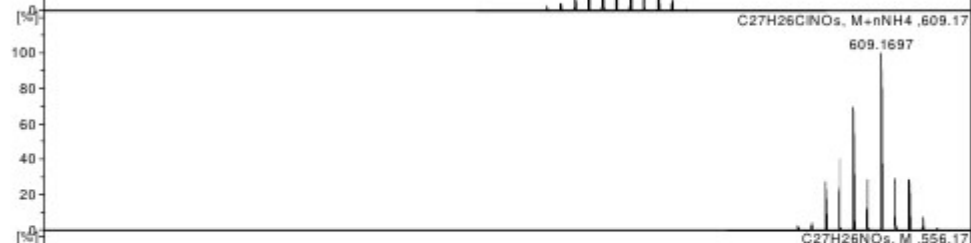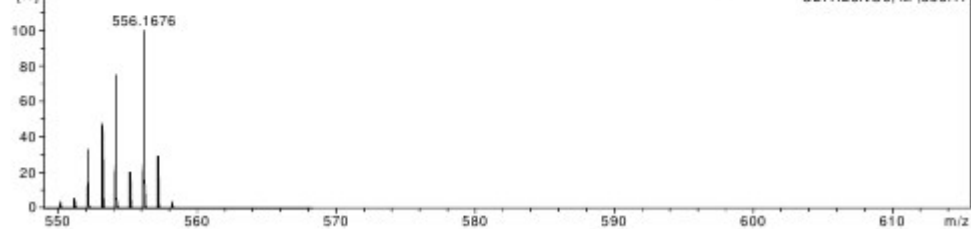

**$[(\eta^6\text{-cymene})\text{Os}(\text{N},\text{C}\text{-anis})\text{Cl}]$  Os12  $^1\text{H}$  NMR (400 MHz,  $\text{CDCl}_3$ )**

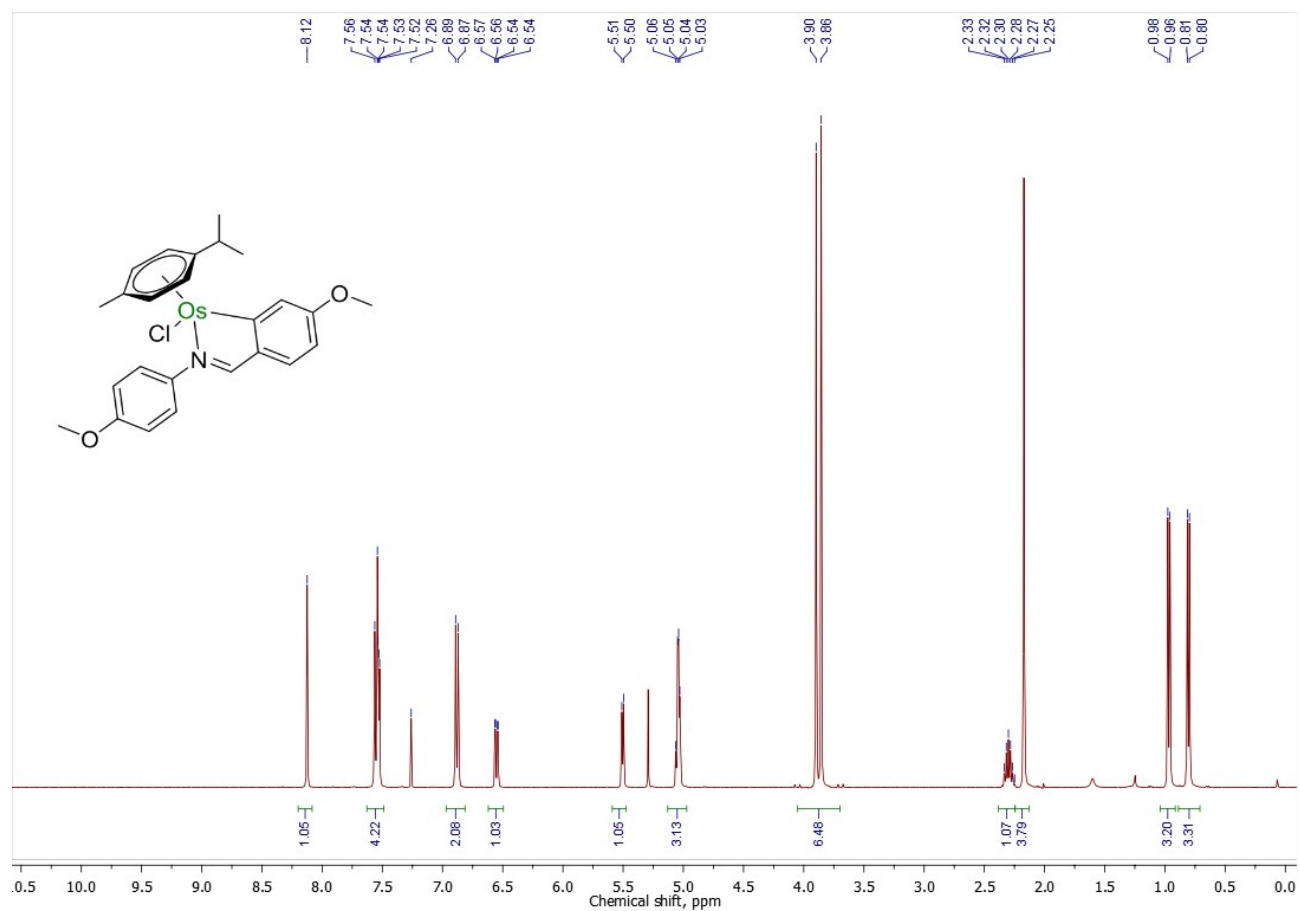

**$[(\eta^6\text{-cymene})\text{Os}(\text{N},\text{C}\text{-anis})\text{Cl}]$  Os12  $^{13}\text{C}$  NMR (101 MHz,  $\text{CDCl}_3$ )**

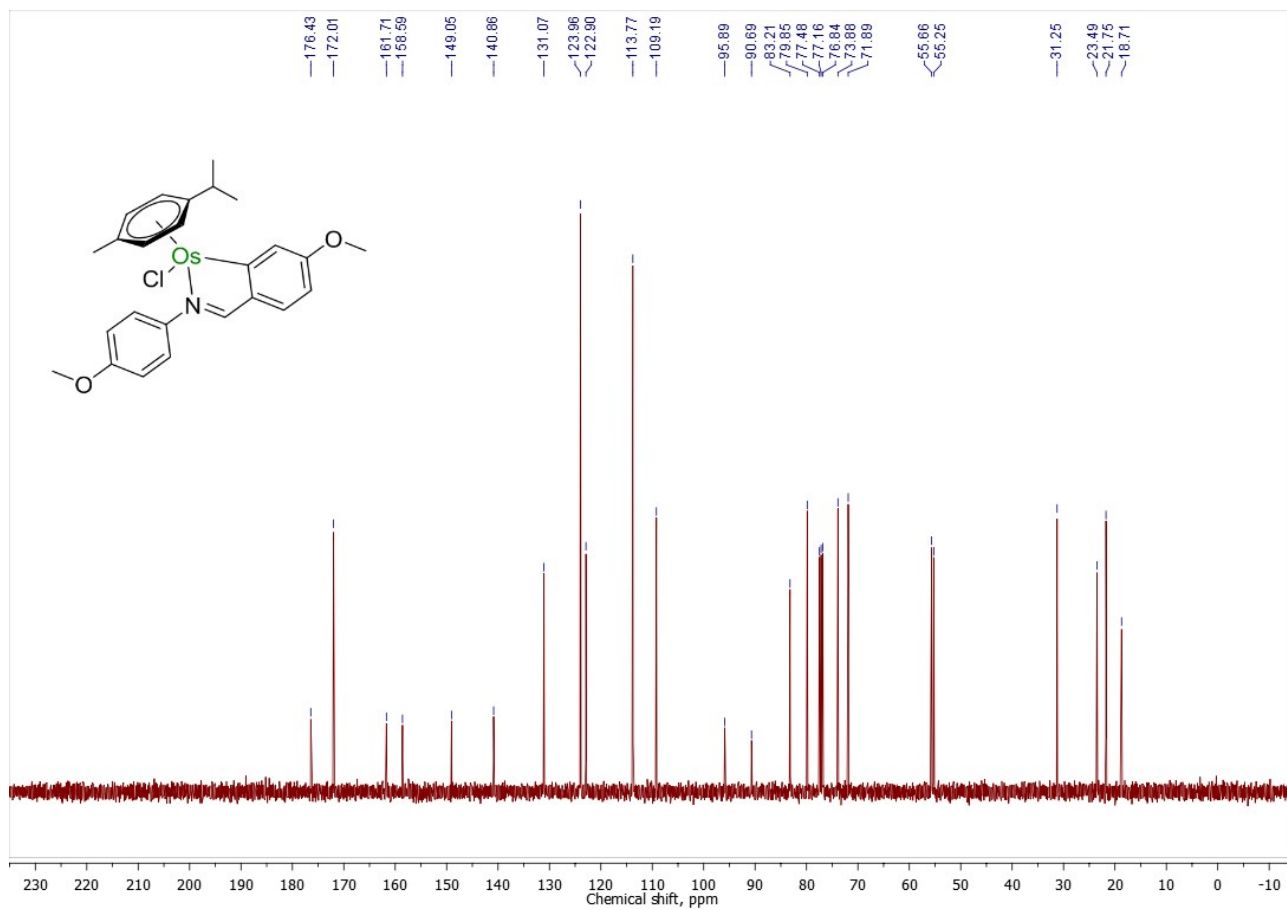



# Display Report

## Analysis Info

Analysis Name D:\Data\Kolotyrkina\2020\Loginov\1117036.d  
Method tune\_50-1600.m  
Sample Name /NGKO LD-23  
Comment C25H28NO2Os MH 567.1808 clb added CH3CN

Acquisition Date 17.11.2020 17:39:23

Operator BDAL@DE  
Instrument / Ser# micrOTOF 10248

## Acquisition Parameter

|             |            |                      |          |                  |           |
|-------------|------------|----------------------|----------|------------------|-----------|
| Source Type | ESI        | Ion Polarity         | Positive | Set Nebulizer    | 1.0 Bar   |
| Focus       | Not active |                      |          | Set Dry Heater   | 200 °C    |
| Scan Begin  | 50 m/z     | Set Capillary        | 4500 V   | Set Dry Gas      | 4.0 l/min |
| Scan End    | 1600 m/z   | Set End Plate Offset | -500 V   | Set Divert Valve | Waste     |

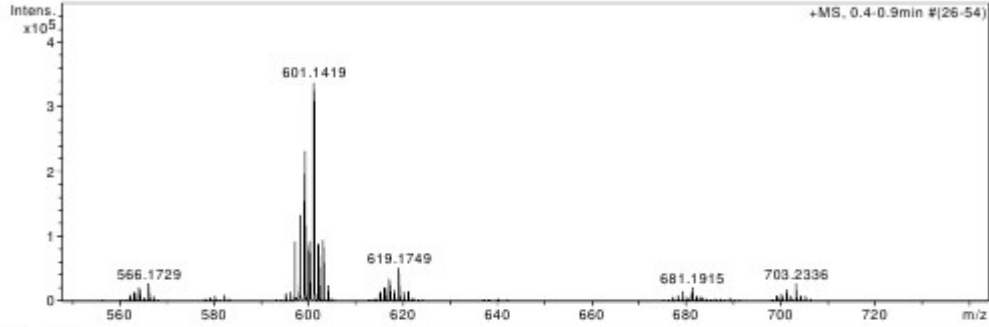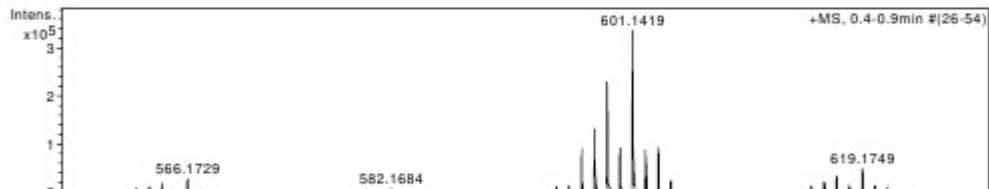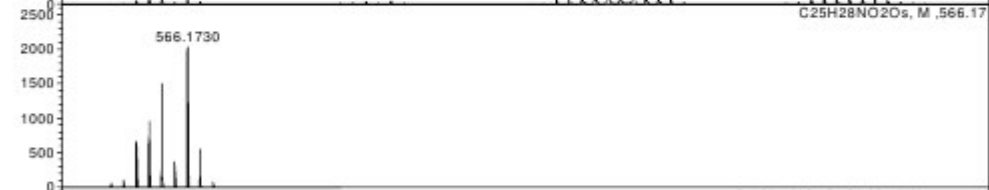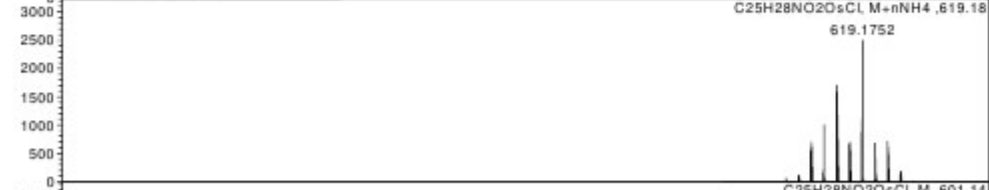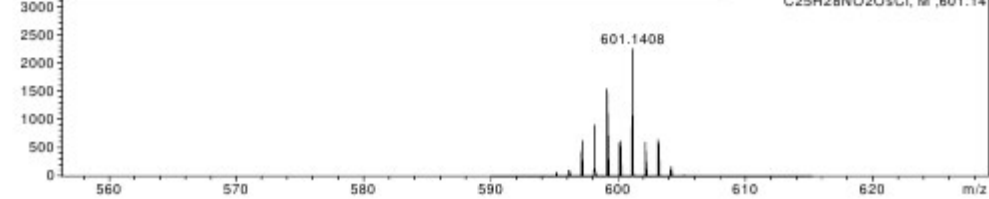

## 9. $^1\text{H}$ and $^{13}\text{C}$ NMR spectra of the RA products.

4-methoxy-N-(4-methoxybenzyl)aniline (1)  $^1\text{H}$  NMR (300 MHz,  $\text{CDCl}_3$ )

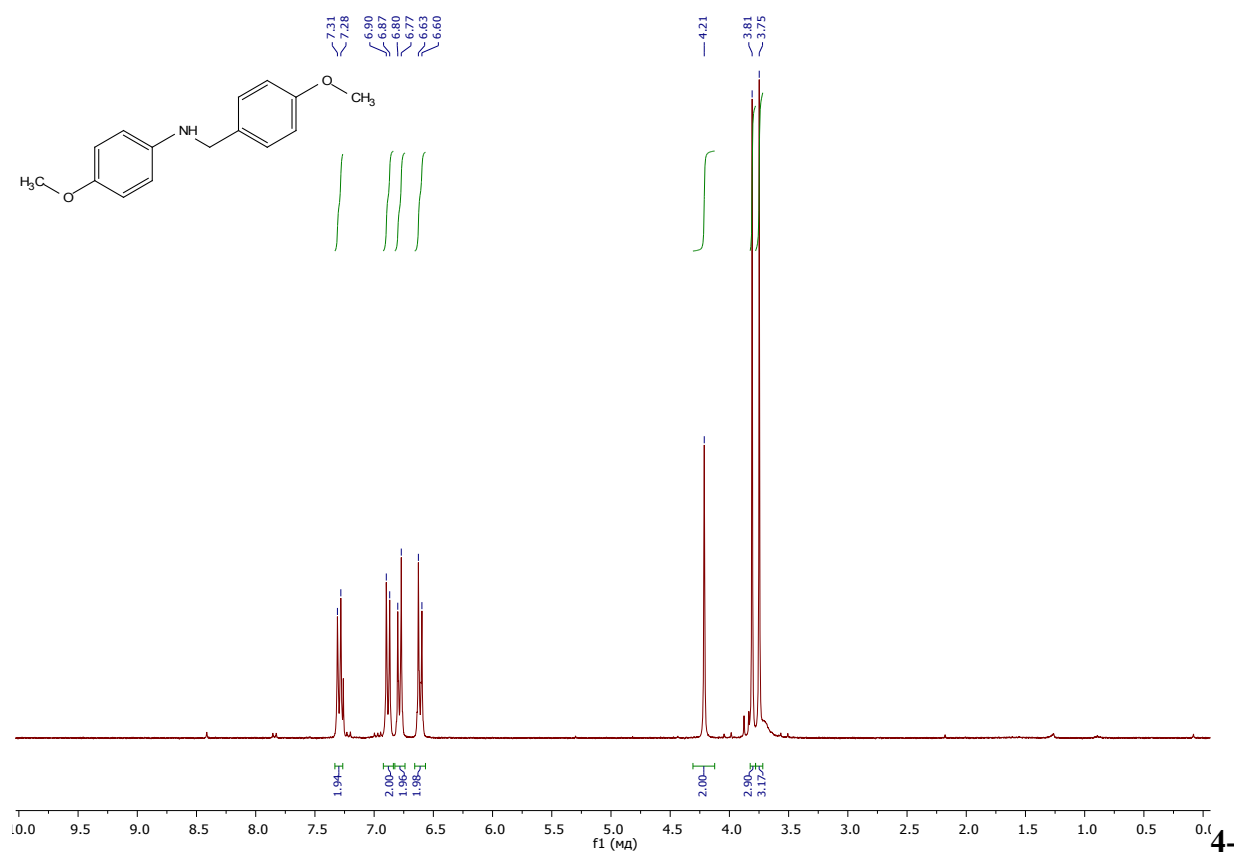

4-methoxy-N-(4-methoxybenzyl)aniline (1)  $^{13}\text{C}$  NMR (101 MHz,  $\text{CDCl}_3$ )

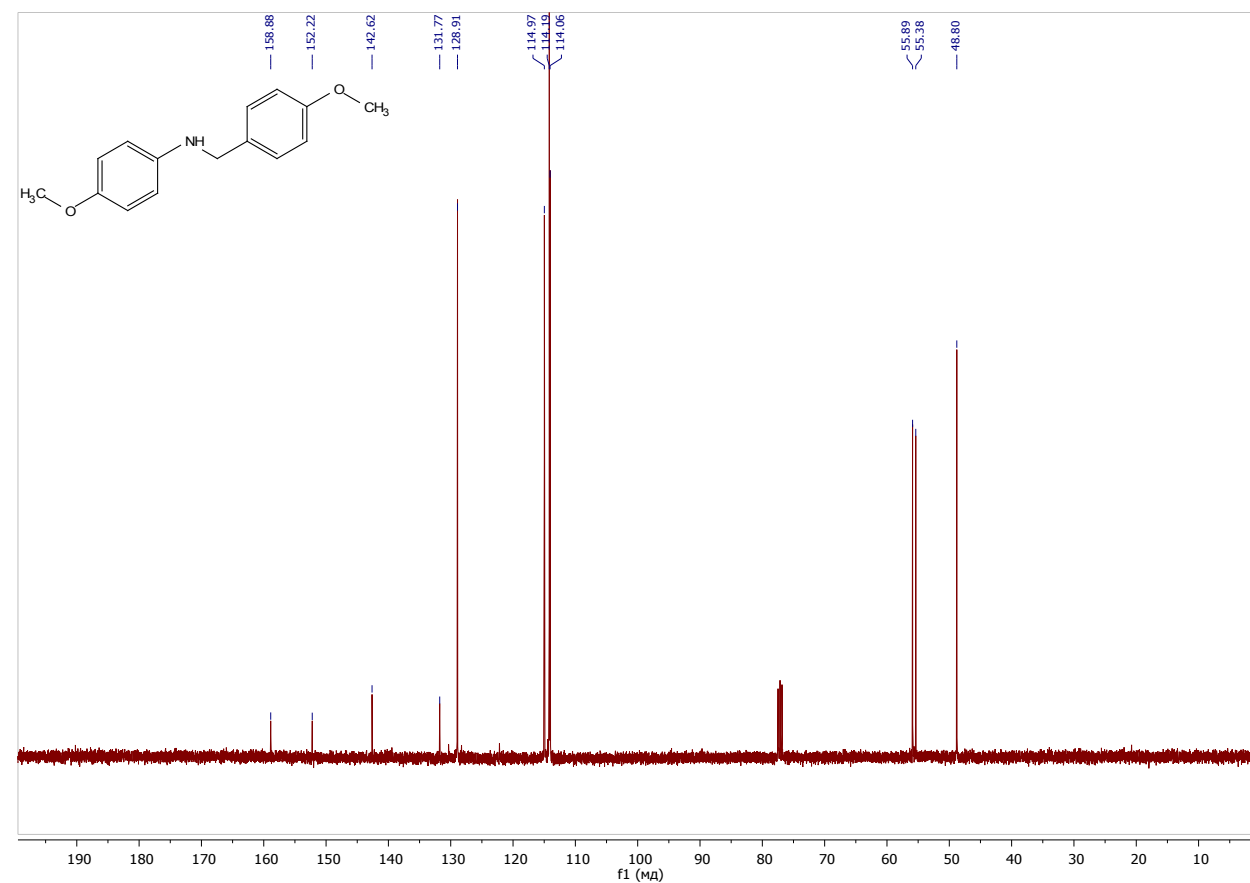

**4-methoxy-N-(3-methoxybenzyl)aniline (2)**  $^1\text{H}$  NMR (300 MHz,  $\text{CDCl}_3$ )

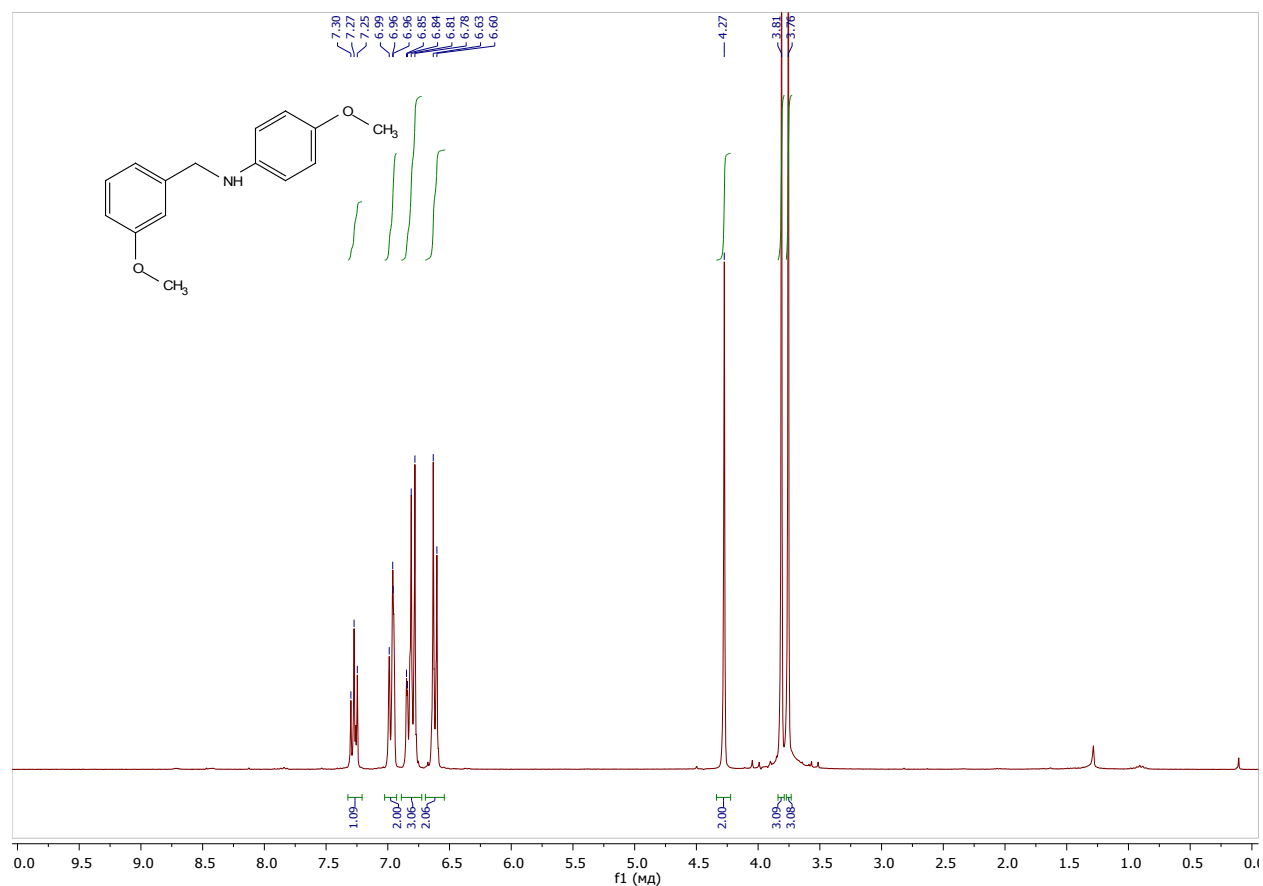

**4-methoxy-N-(3-methoxybenzyl)aniline (2)**  $^{13}\text{C}$  NMR (101 MHz,  $\text{CDCl}_3$ )

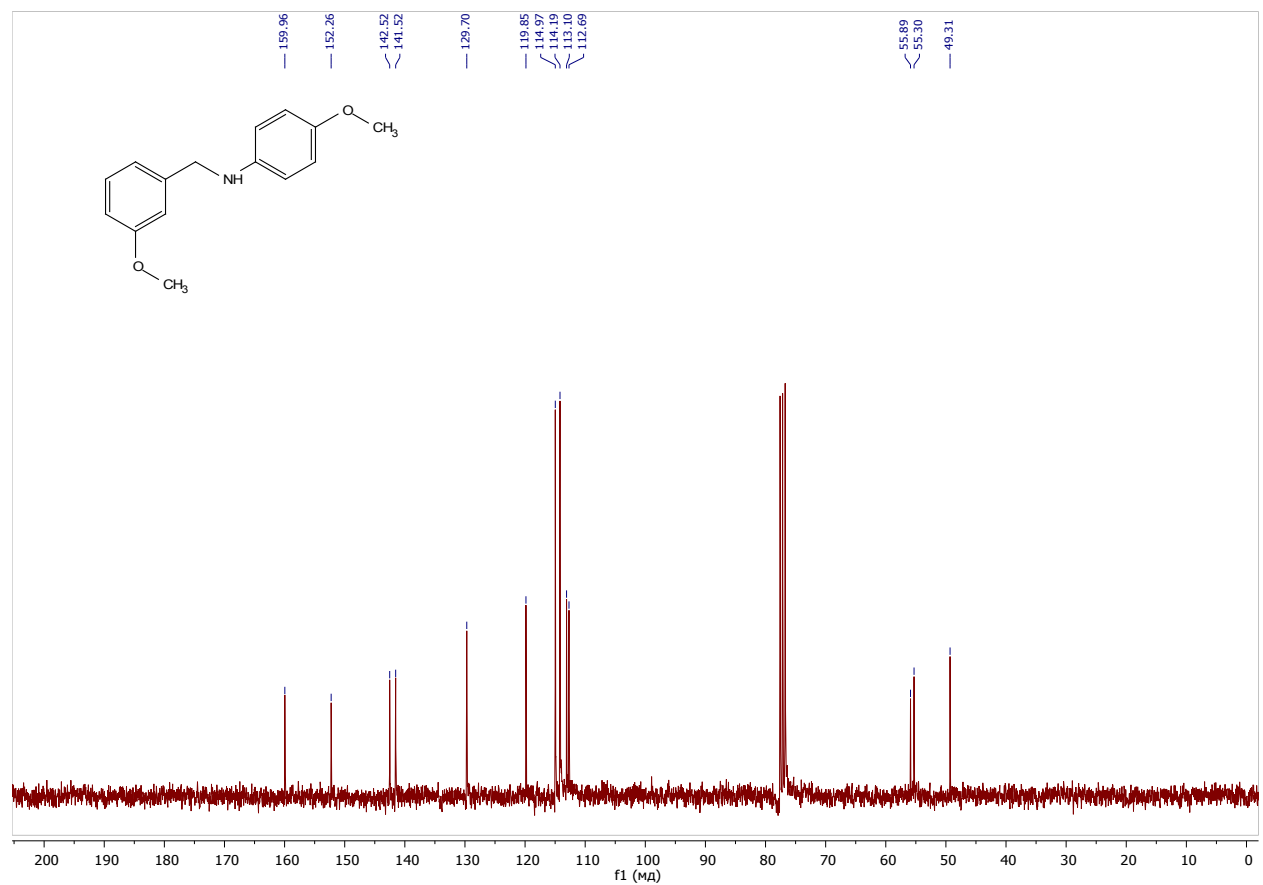

**4-methoxy-N-(2-methoxybenzyl)aniline (3)**  $^1\text{H}$  NMR (300 MHz,  $\text{CDCl}_3$ )

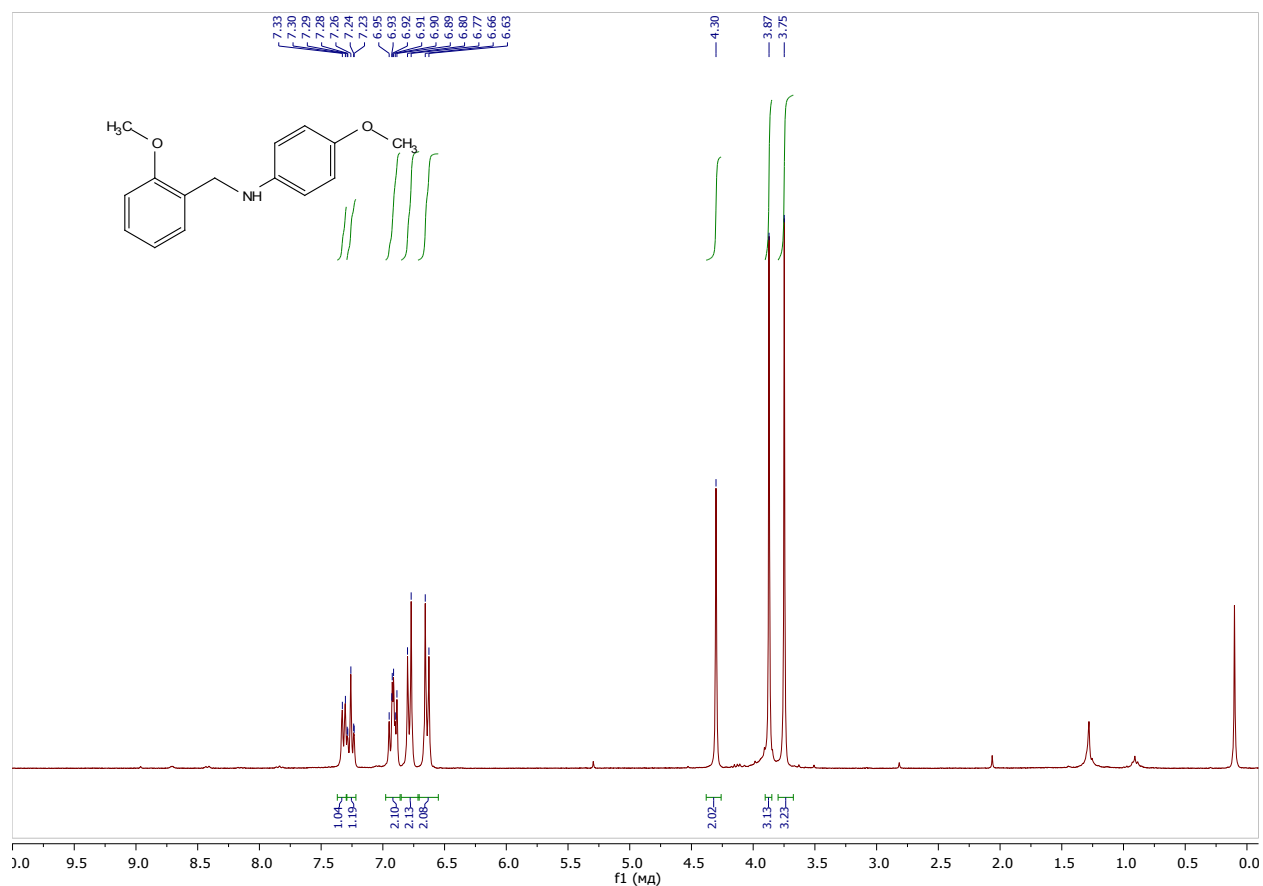

**4-methoxy-N-(2-methoxybenzyl)aniline (3)**  $^{13}\text{C}$  NMR (101 MHz,  $\text{CDCl}_3$ )

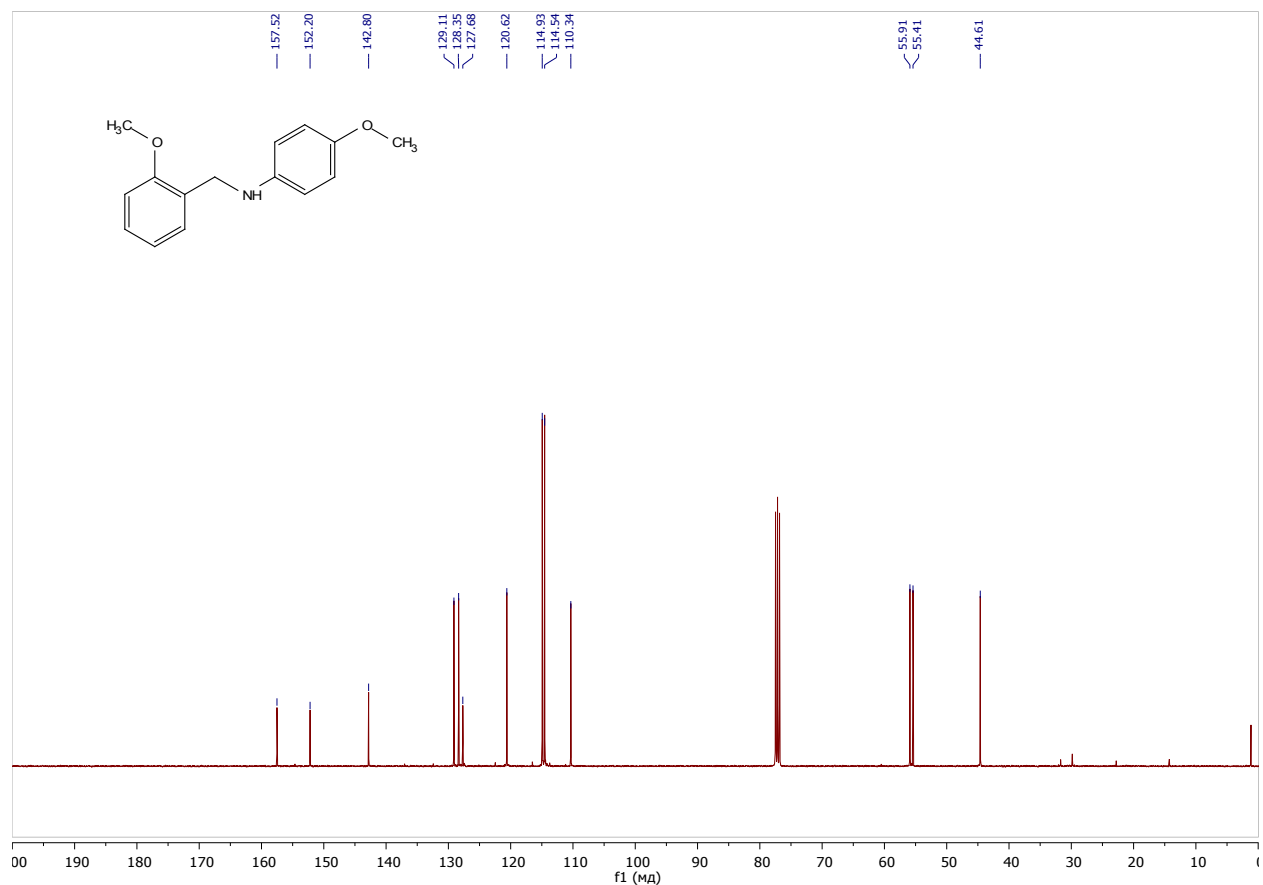

**N-(4-chlorobenzyl)-4-methoxyaniline (4)**  $^1\text{H}$  NMR (300 MHz,  $\text{CDCl}_3$ )

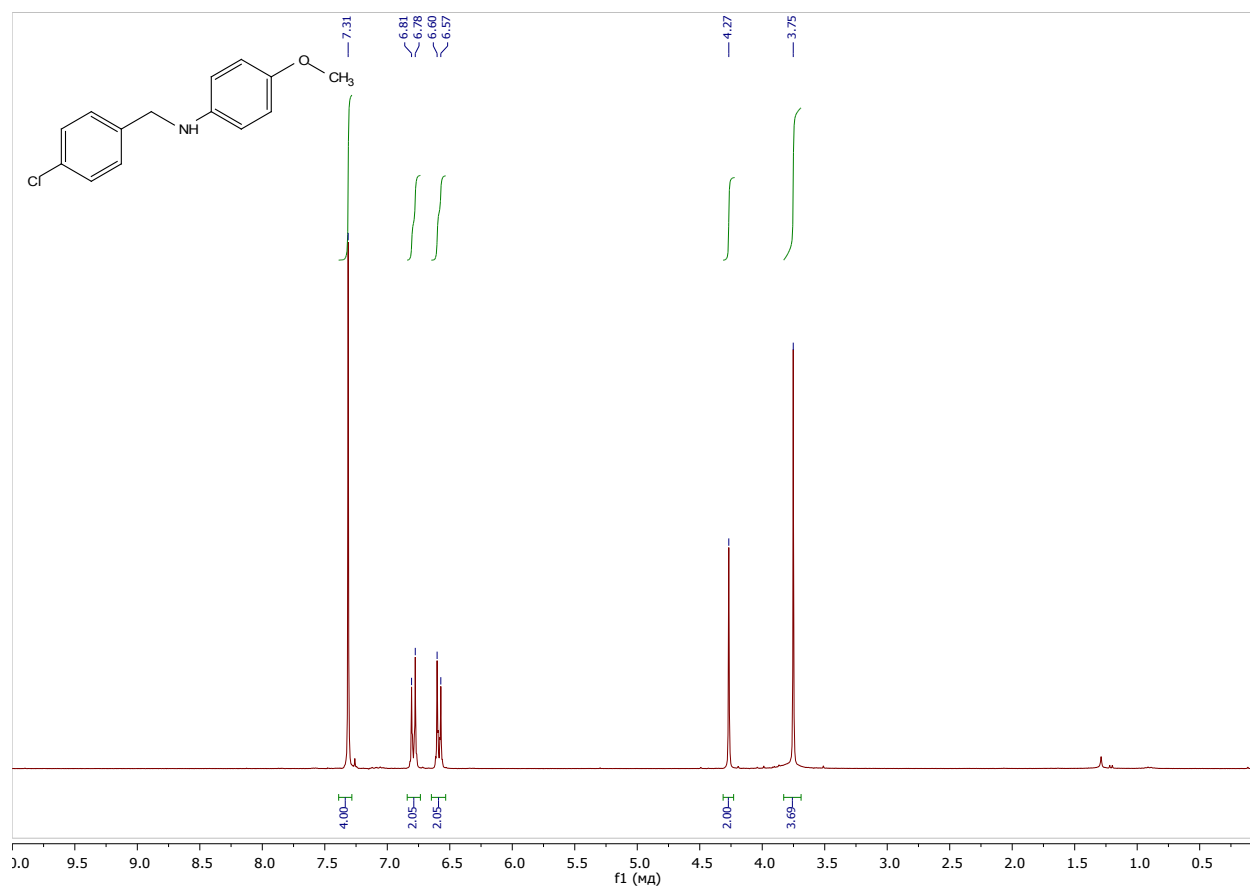

**N-(4-chlorobenzyl)-4-methoxyaniline (4)**  $^{13}\text{C}$  NMR (101 MHz,  $\text{CDCl}_3$ )

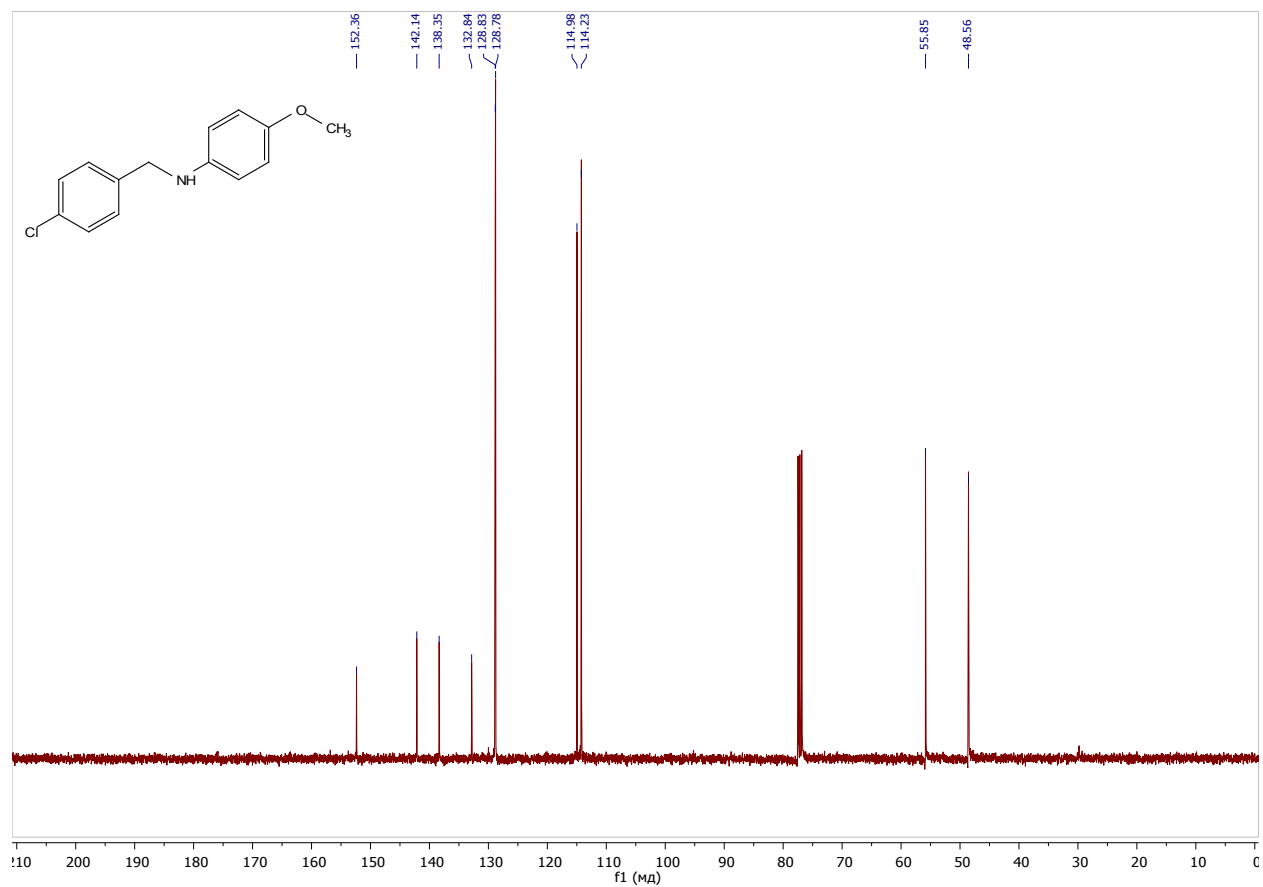

**N-(3-chlorobenzyl)-4-methoxyaniline (5)**  $^1\text{H}$  NMR (400 MHz,  $\text{CDCl}_3$ )

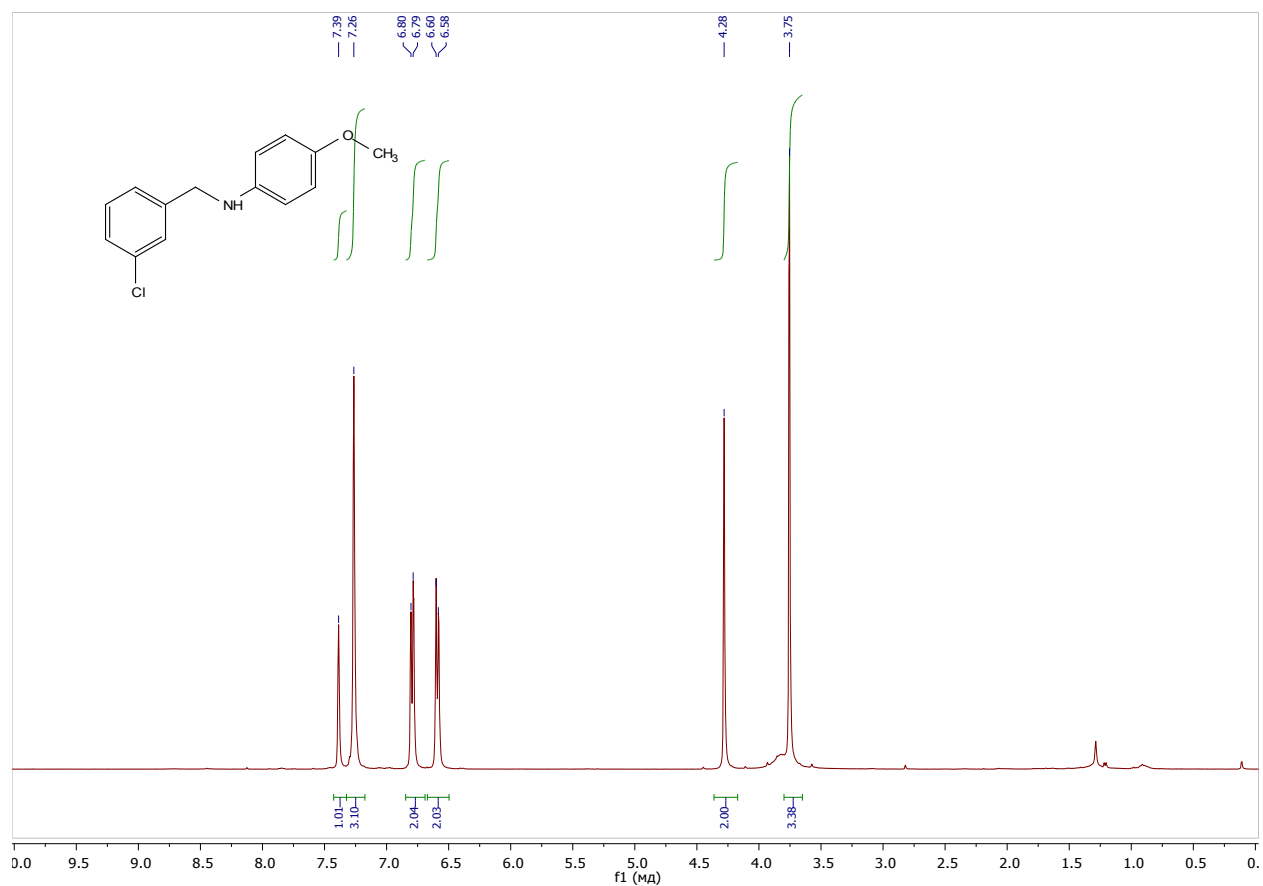

**N-(3-chlorobenzyl)-4-methoxyaniline (5)**  $^{13}\text{C}$  NMR (101 MHz,  $\text{CDCl}_3$ )

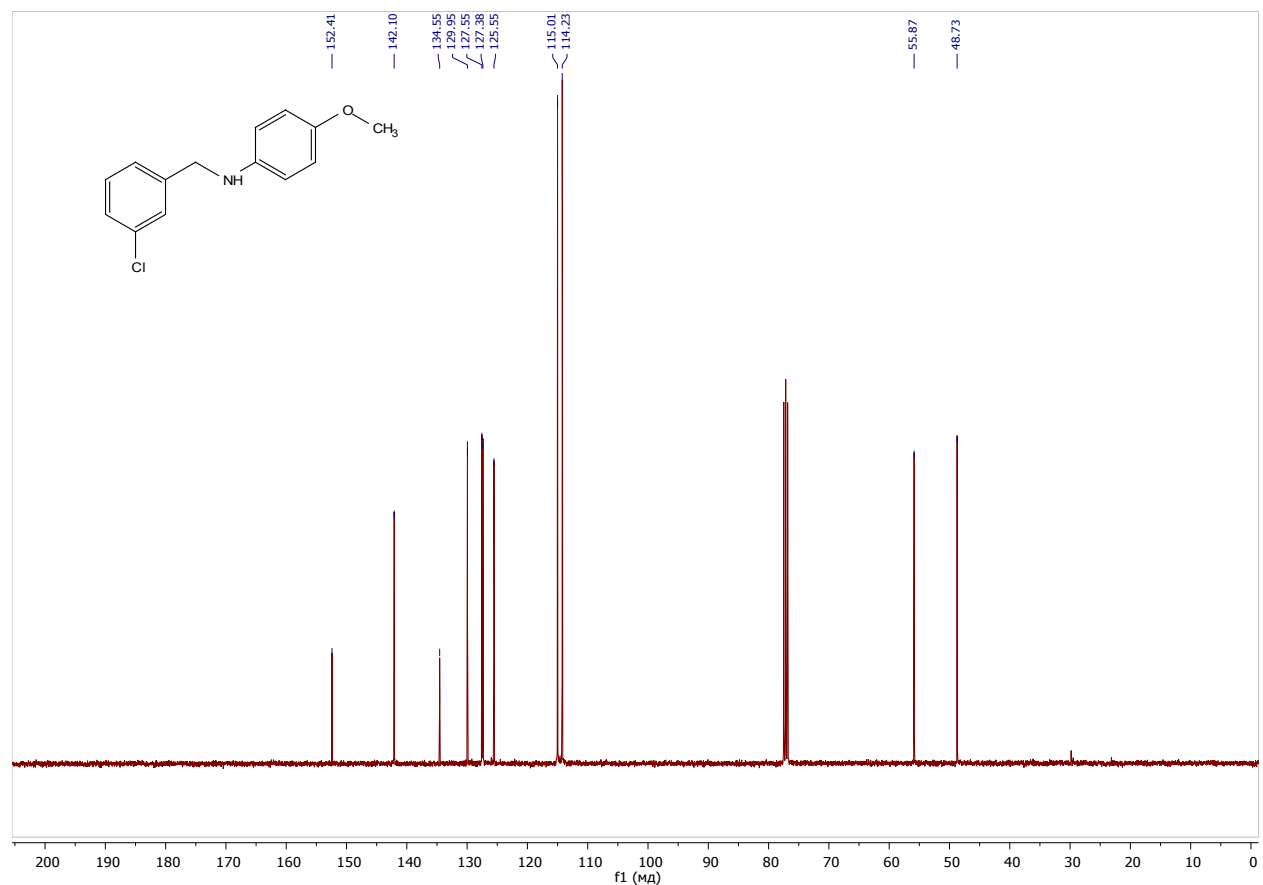

**N-(4-(benzyloxy)benzyl)-4-methoxyaniline (6)**  $^1\text{H}$  NMR (400 MHz,  $\text{CDCl}_3$ )

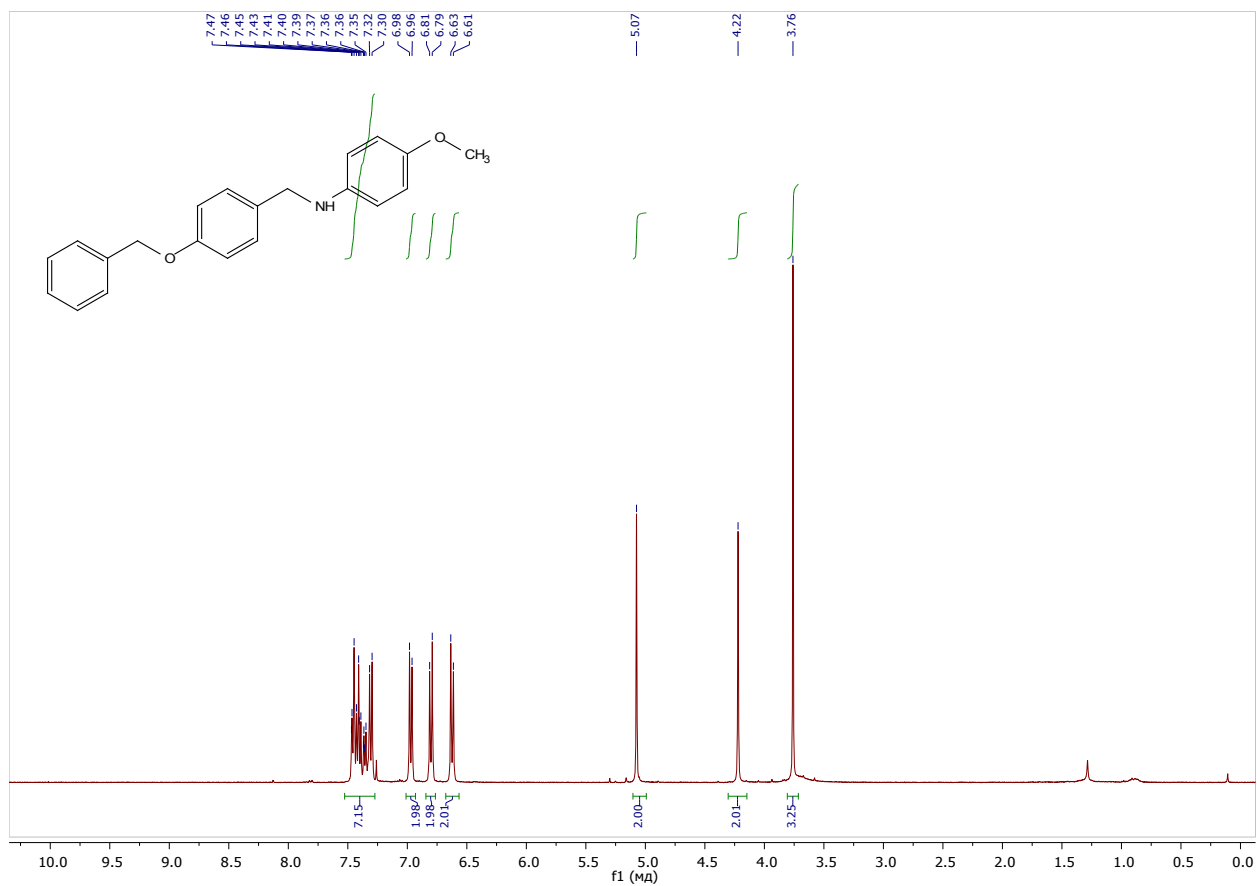

**N-(4-(benzyloxy)benzyl)-4-methoxyaniline (6)**  $^{13}\text{C}$  NMR (101 MHz,  $\text{CDCl}_3$ )

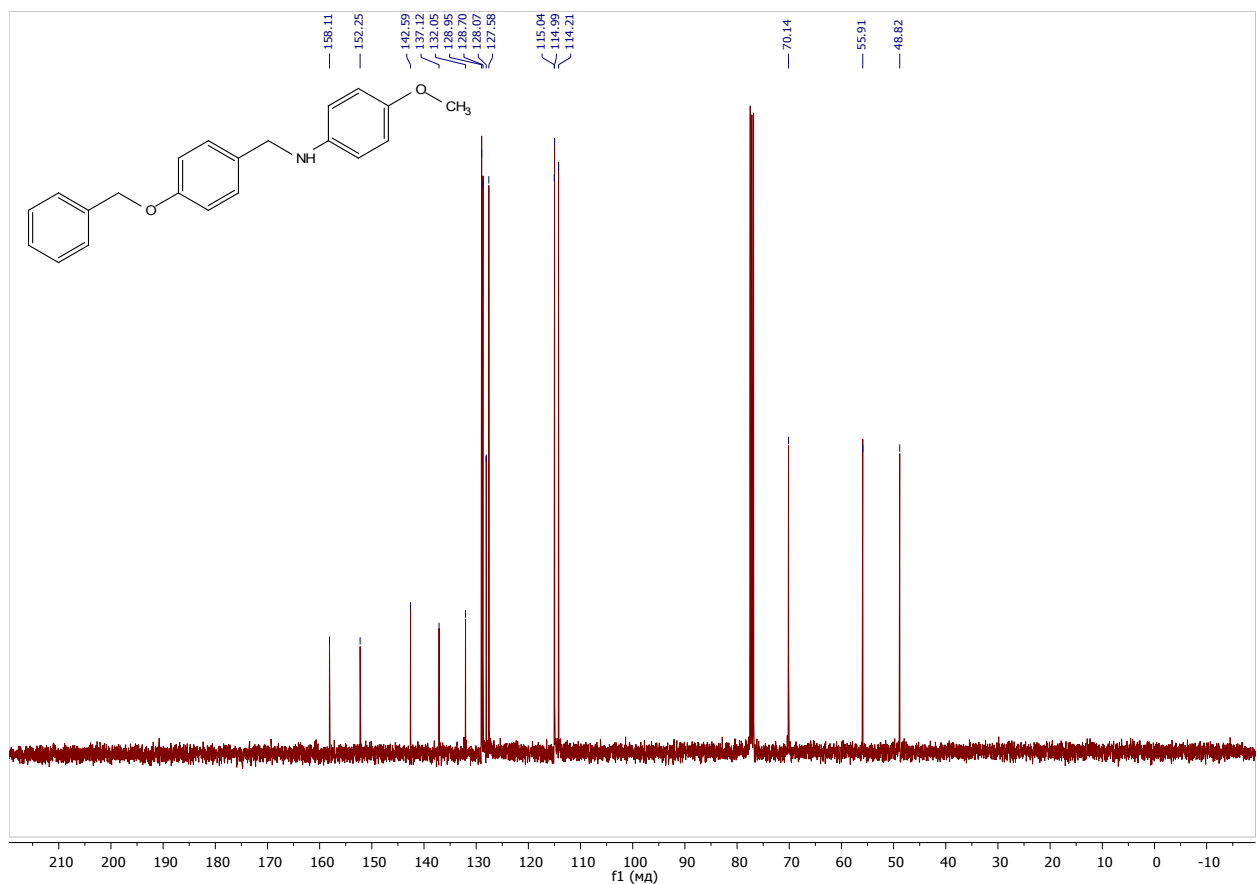

**N-isopropyl-4-methoxyaniline (7)  $^1\text{H}$  NMR (400 MHz,  $\text{CDCl}_3$ )**

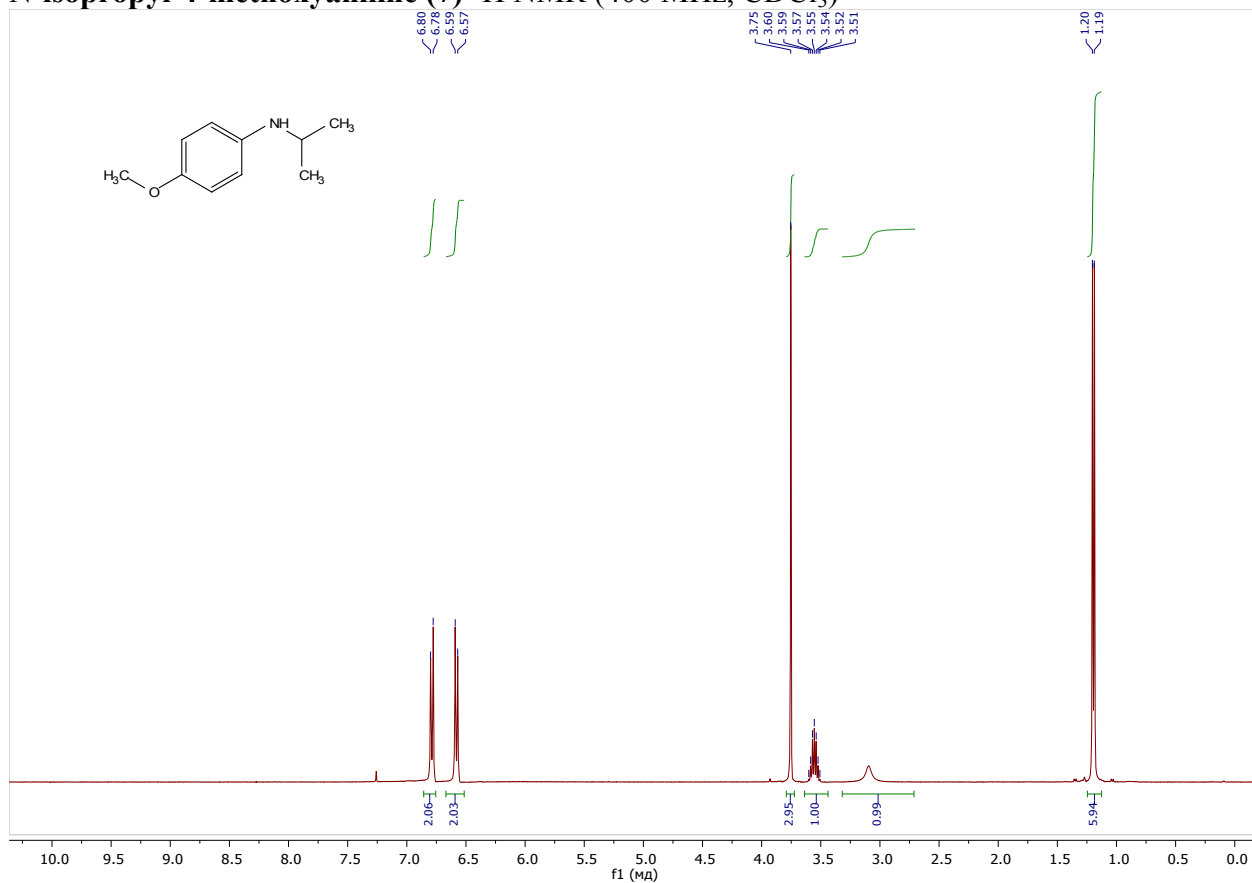

**N-isopropyl-4-methoxyaniline (7)  $^{13}\text{C}$  NMR (101 MHz,  $\text{CDCl}_3$ )**

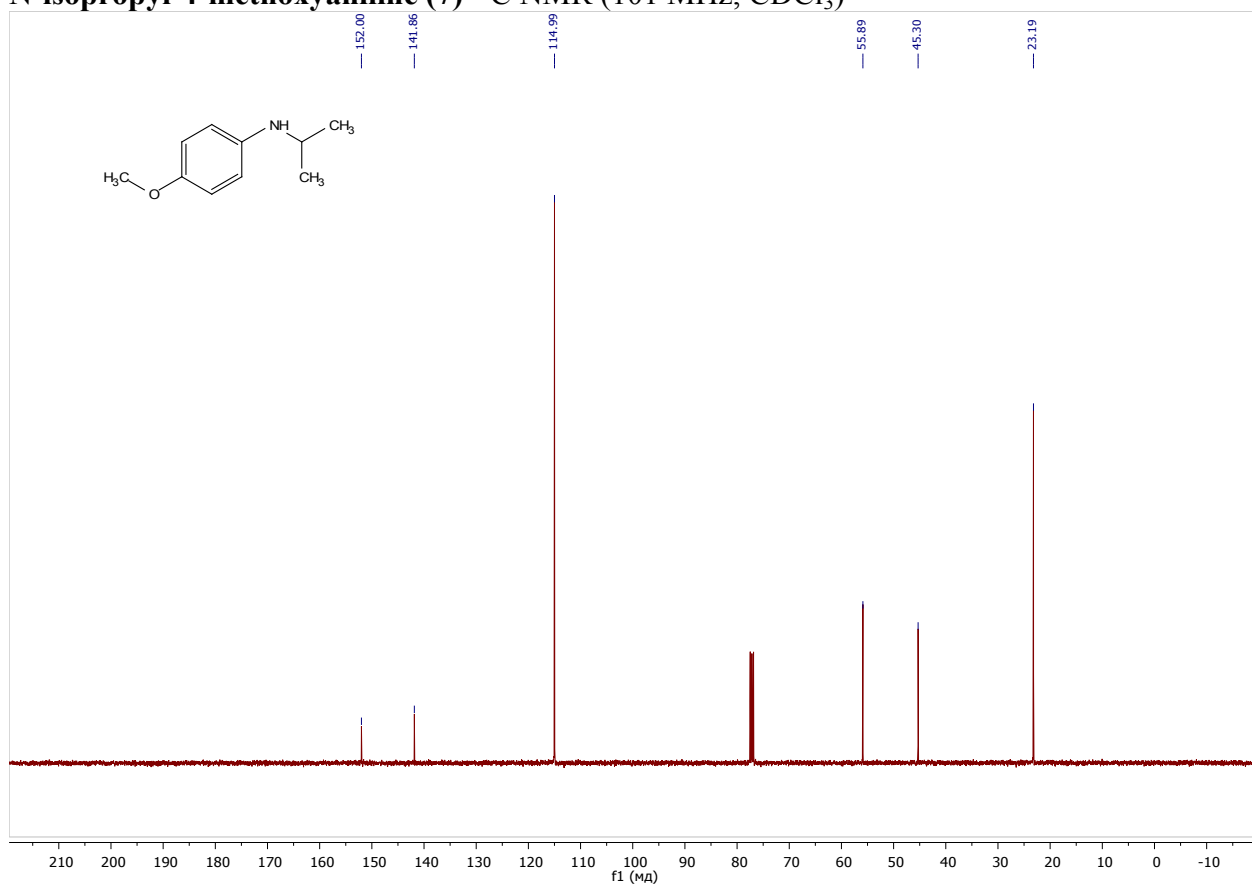



**N-(4-methoxyphenyl)adamantan-2-amine (8)**  $^1\text{H}$  NMR (300 MHz,  $\text{CDCl}_3$ )

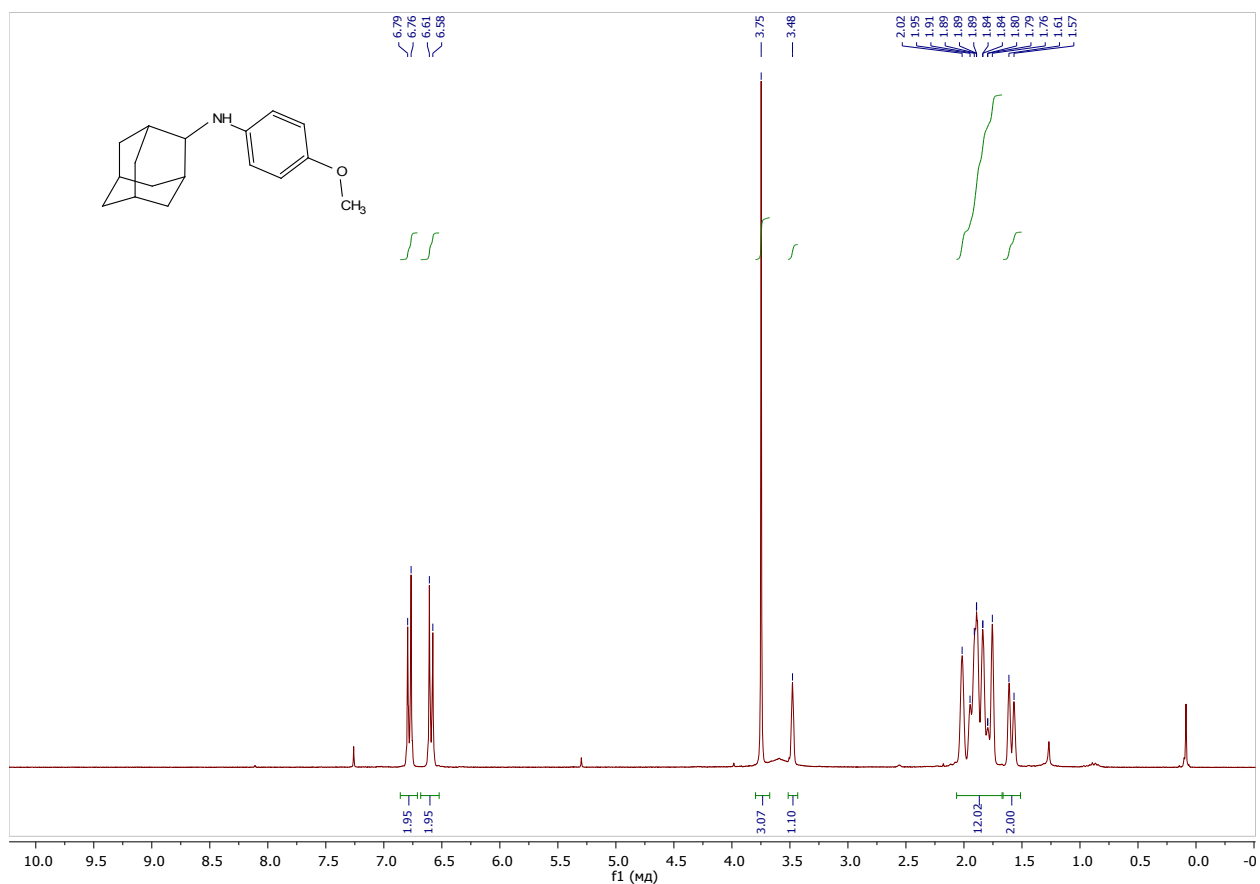

**N-(4-methoxyphenyl)adamantan-2-amine (8)**  $^{13}\text{C}$  NMR (101 MHz,  $\text{CDCl}_3$ )

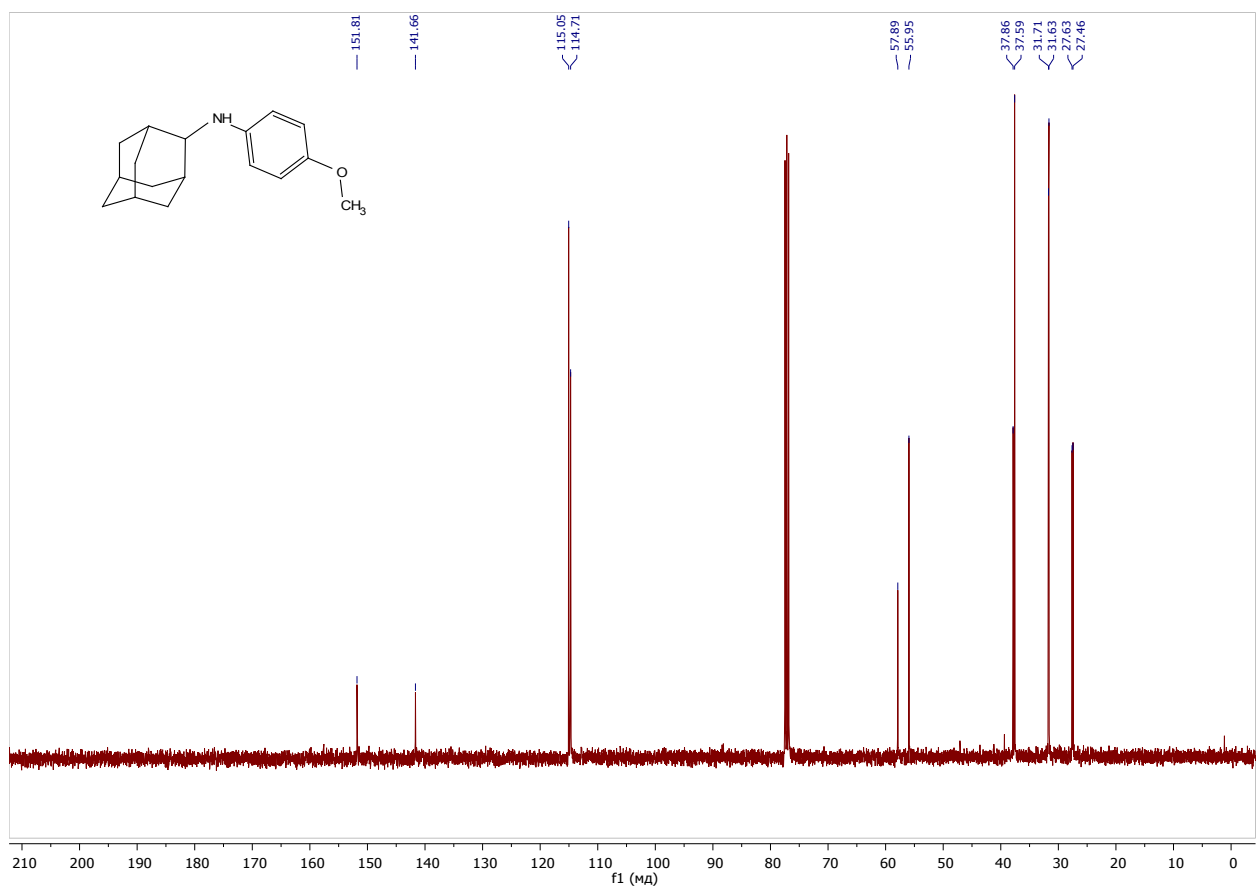

4-(4-phenylbutan-2-yl)-morpholine (9) <sup>1</sup>H NMR (400 MHz, CDCl<sub>3</sub>)

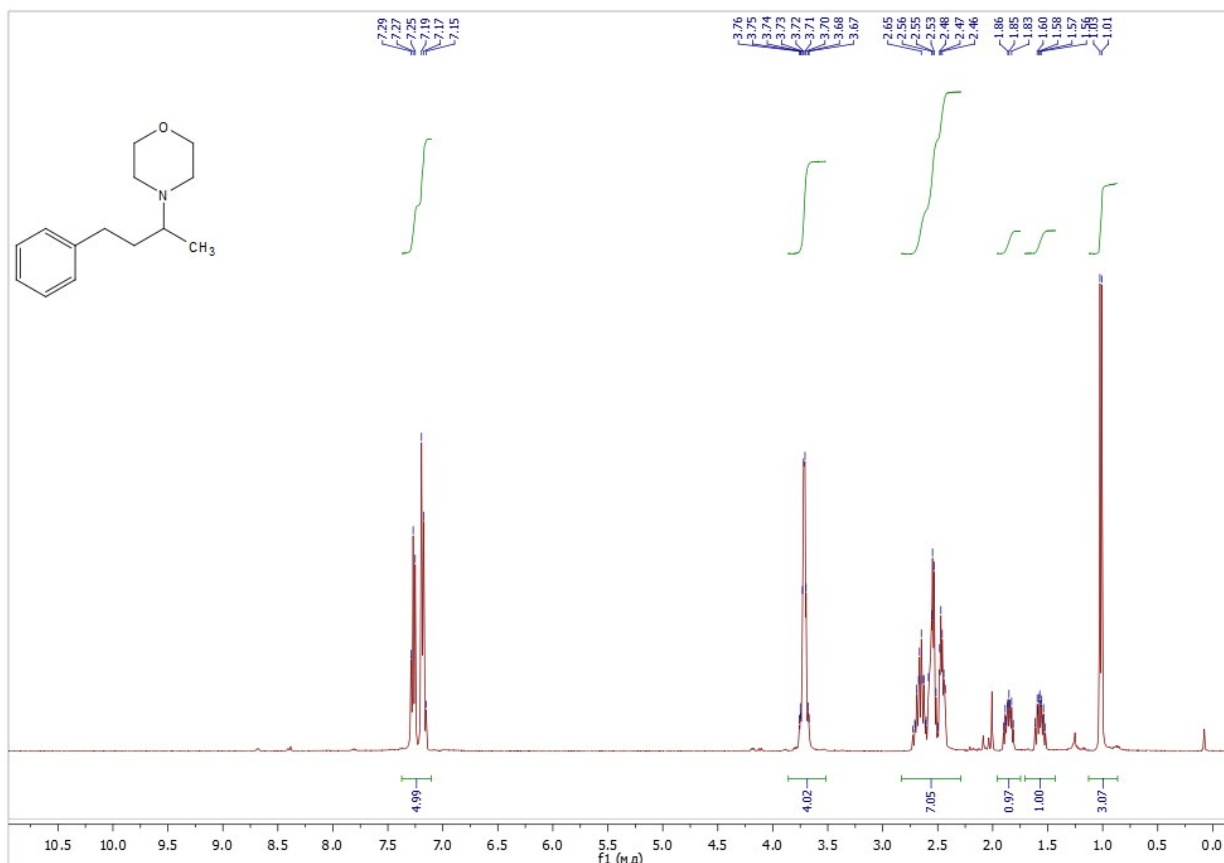

4-(4-phenylbutan-2-yl)-morpholine (9) <sup>13</sup>C NMR (101 MHz, CDCl<sub>3</sub>)

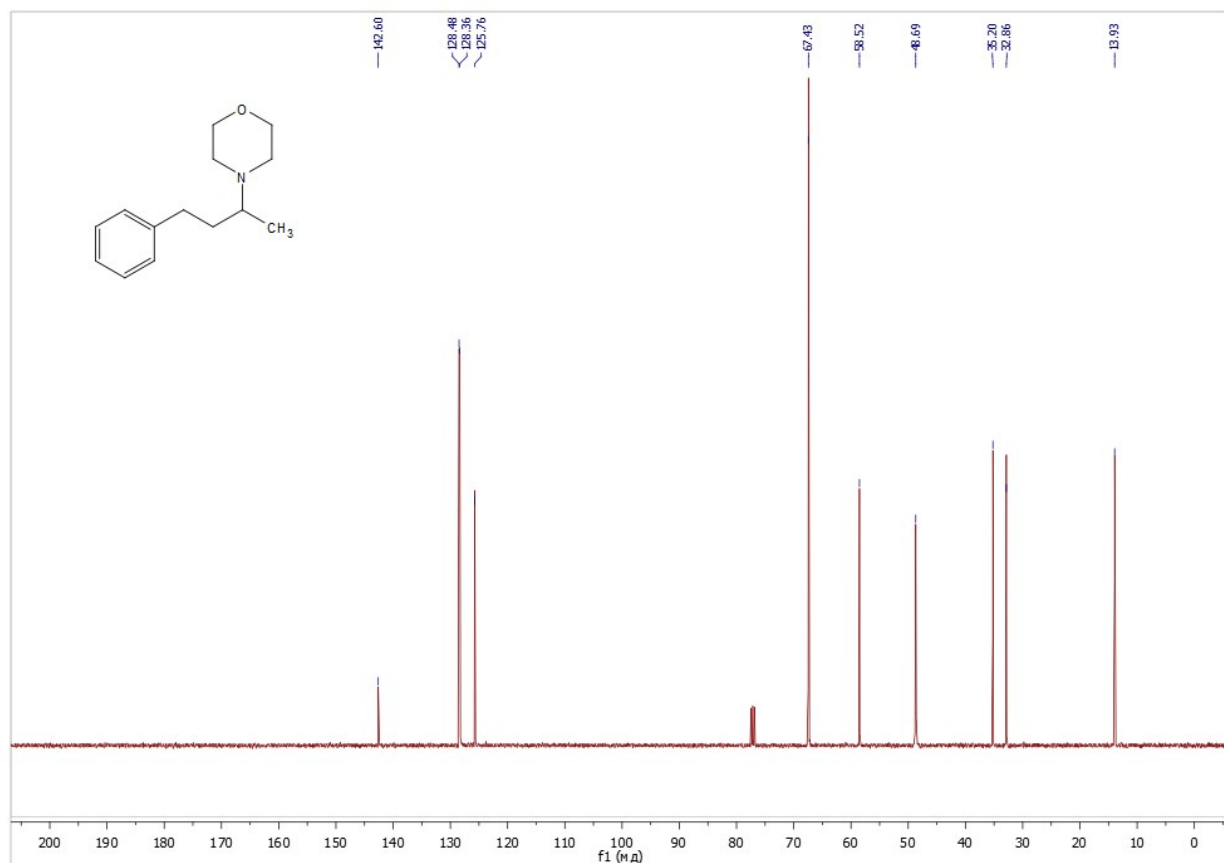

**N-benzyl-4-phenylbutan-2-amine (10)**  $^1\text{H}$  NMR (400 MHz,  $\text{CDCl}_3$ )

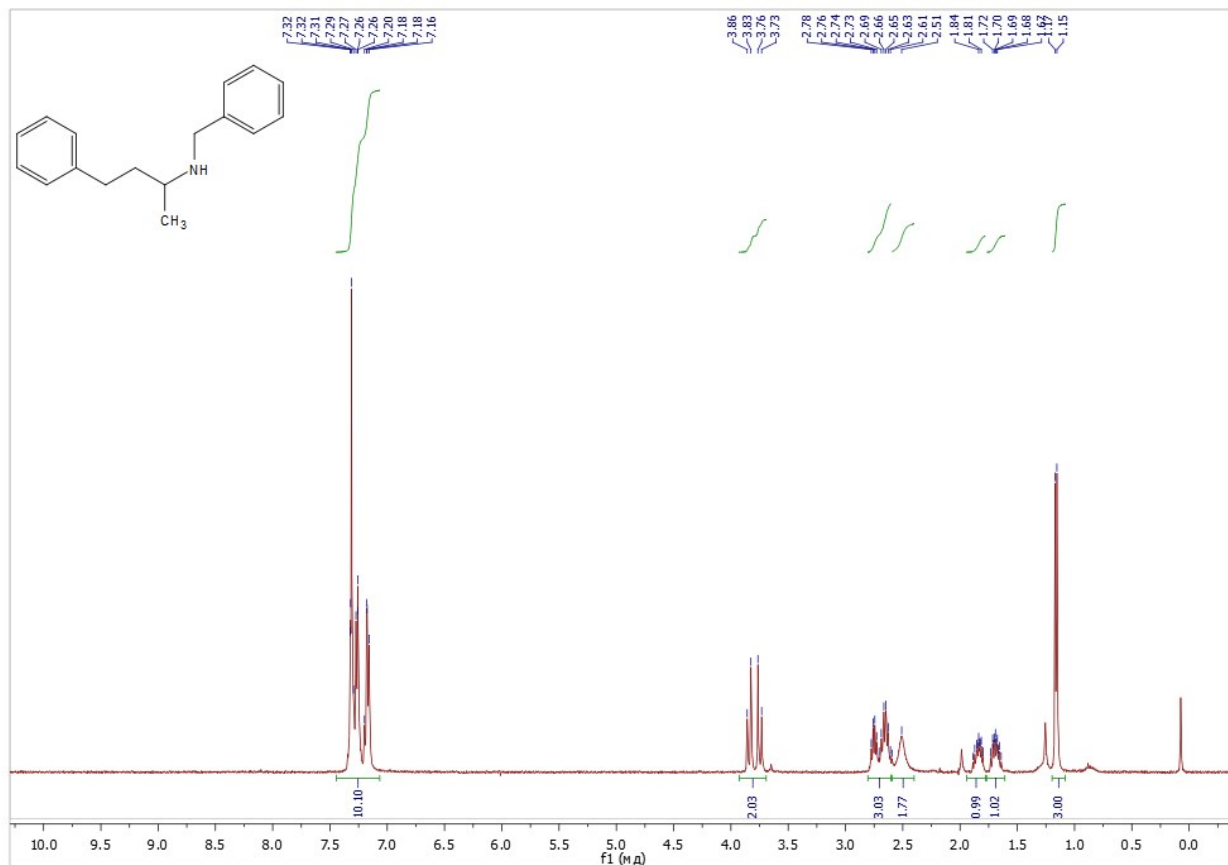

**N-benzyl-4-phenylbutan-2-amine (10)**  $^{13}\text{C}$  NMR (101 MHz,  $\text{CDCl}_3$ )

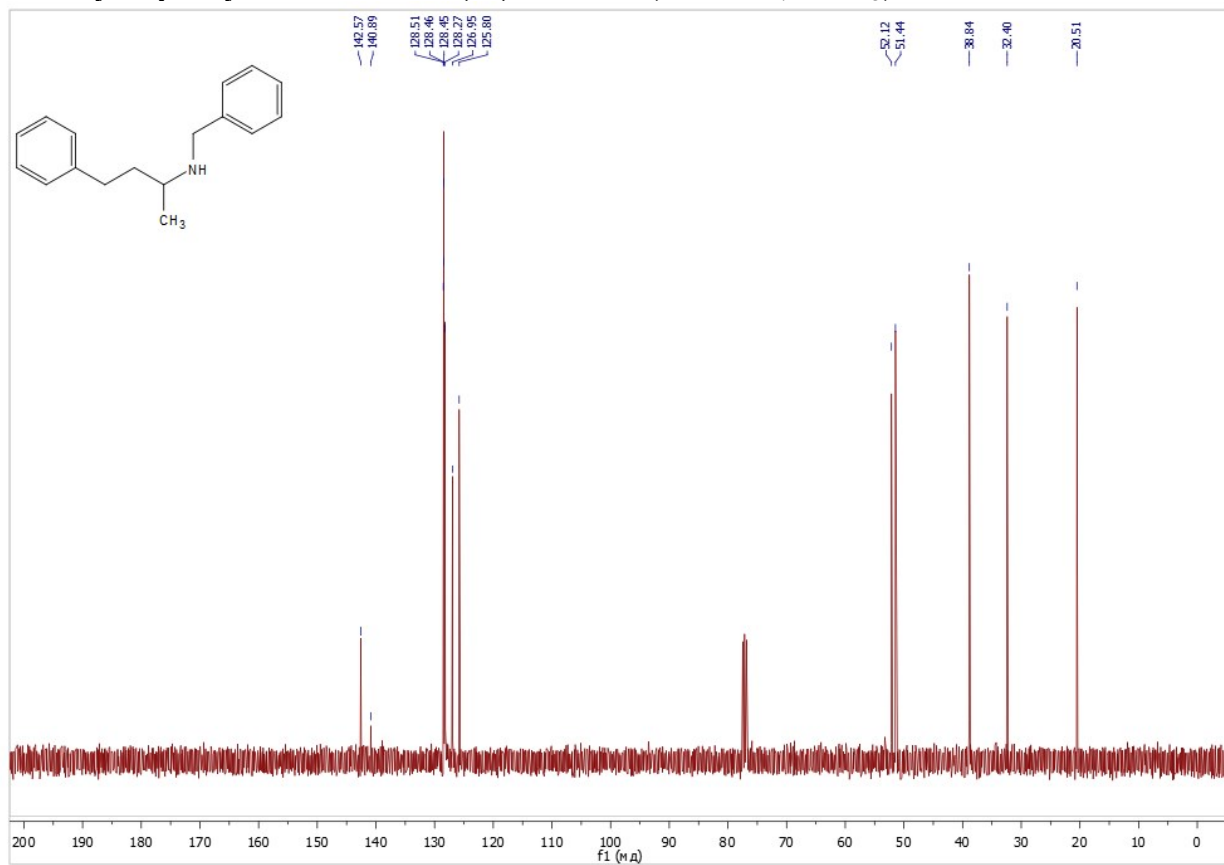

N-benzylcyclopentanamine (11) <sup>1</sup>H NMR (400 MHz, CDCl<sub>3</sub>)

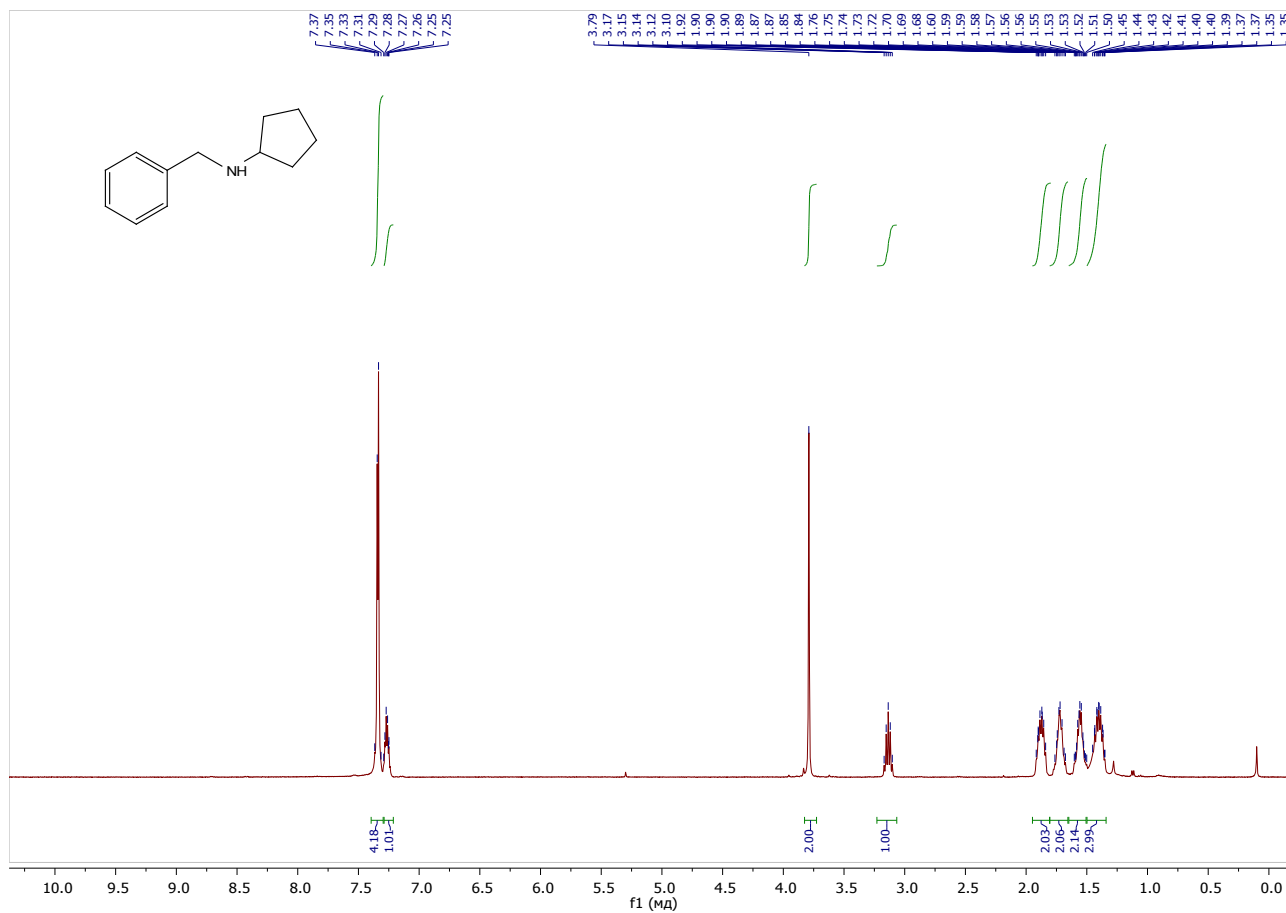

N-benzylcyclopentanamine (**11**)  $^{13}\text{C}$  NMR (101 MHz,  $\text{CDCl}_3$ )

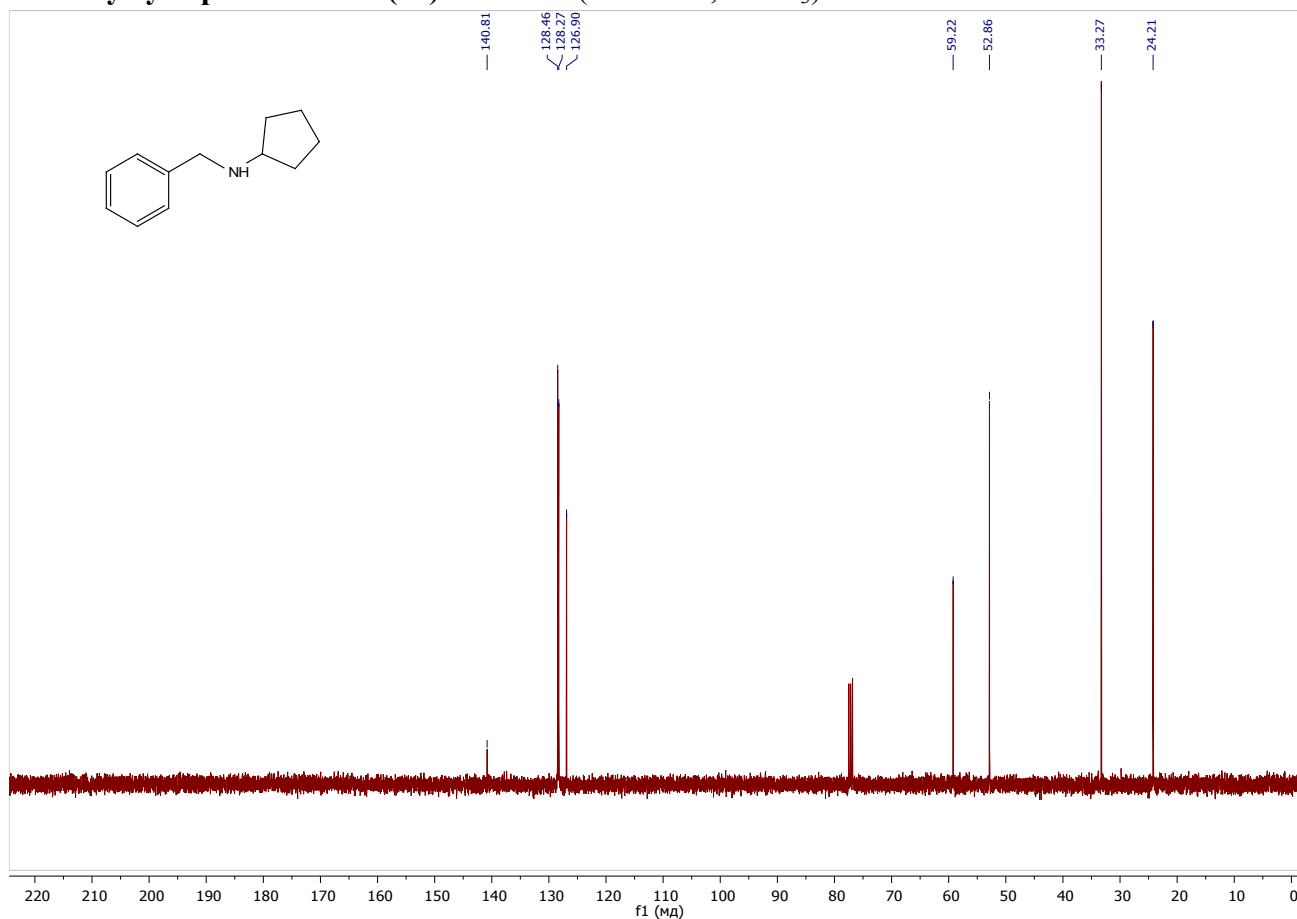

**4-(2-phenylpropyl)morpholine (12)**  $^1\text{H}$  NMR (400 MHz,  $\text{CDCl}_3$ )  $^1\text{H}$  NMR (400 MHz,  $\text{CDCl}_3$ )

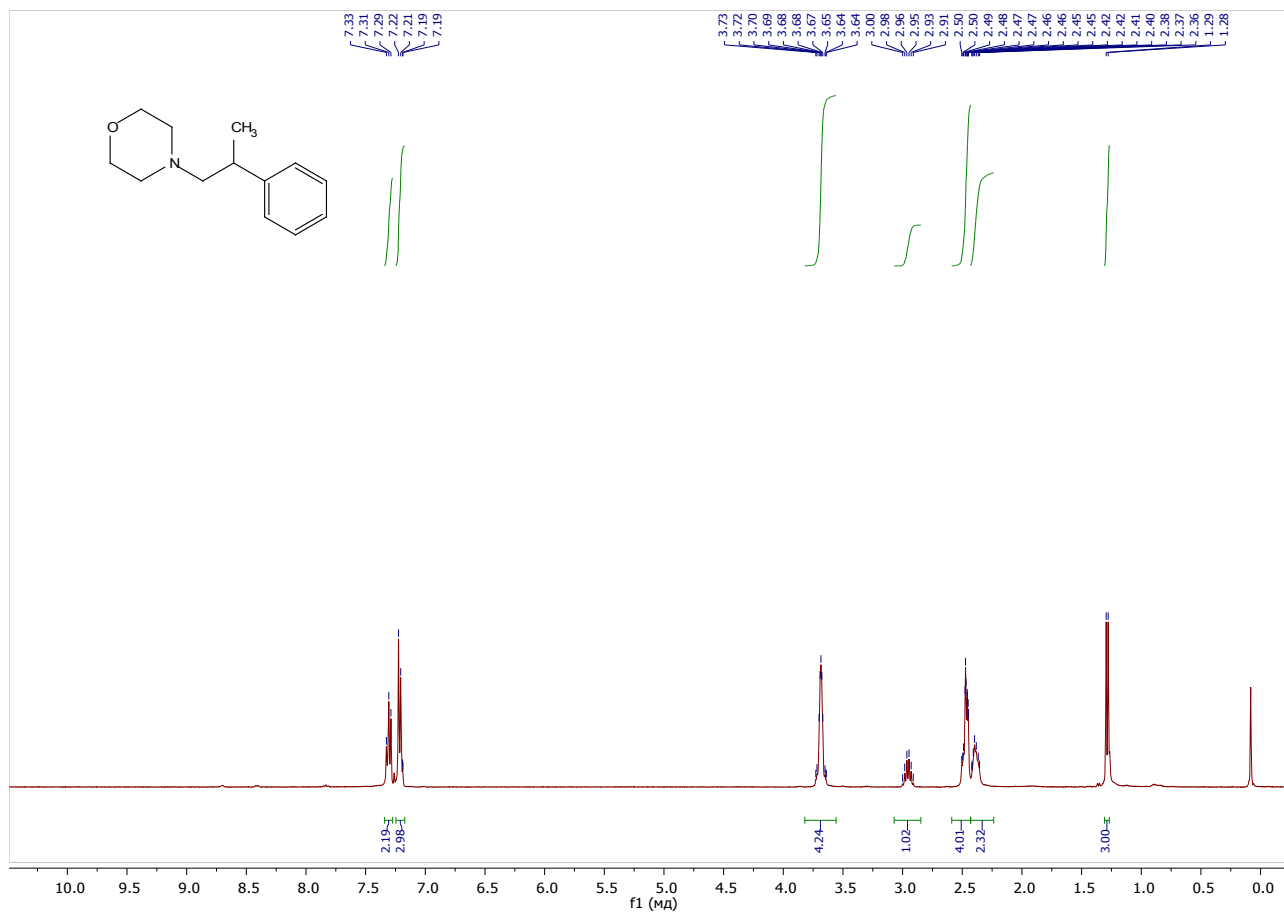

**4-(2-phenylpropyl)morpholine (12)**  $^{13}\text{C}$  NMR (101 MHz,  $\text{CDCl}_3$ )

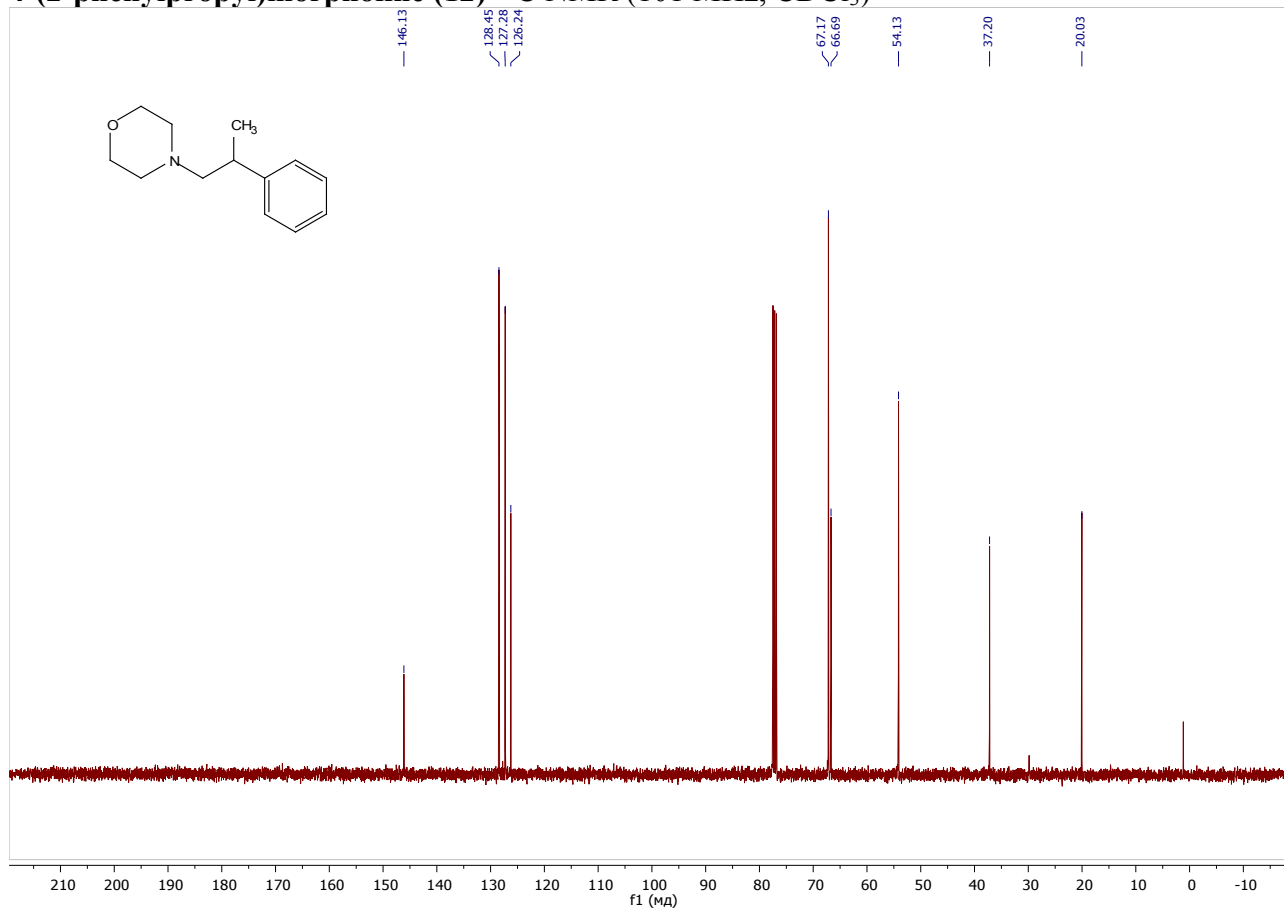

**4-(3-(4-isopropylphenyl)-2-methylpropyl)morpholine (13)**  $^1\text{H}$  NMR (400 MHz,  $\text{CDCl}_3$ )

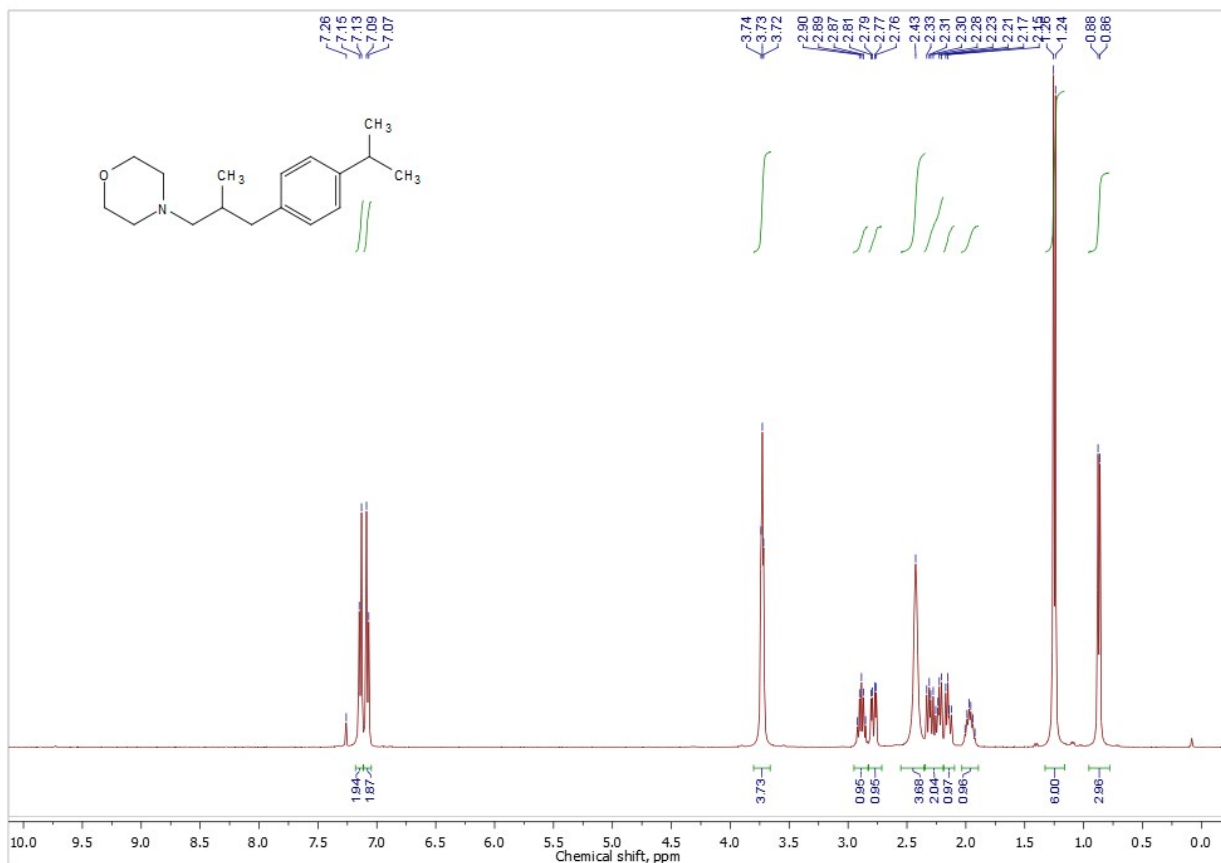

**4-(3-(4-isopropylphenyl)-2-methylpropyl)morpholine (13)**  $^{13}\text{C}$  NMR (101 MHz,  $\text{CDCl}_3$ )

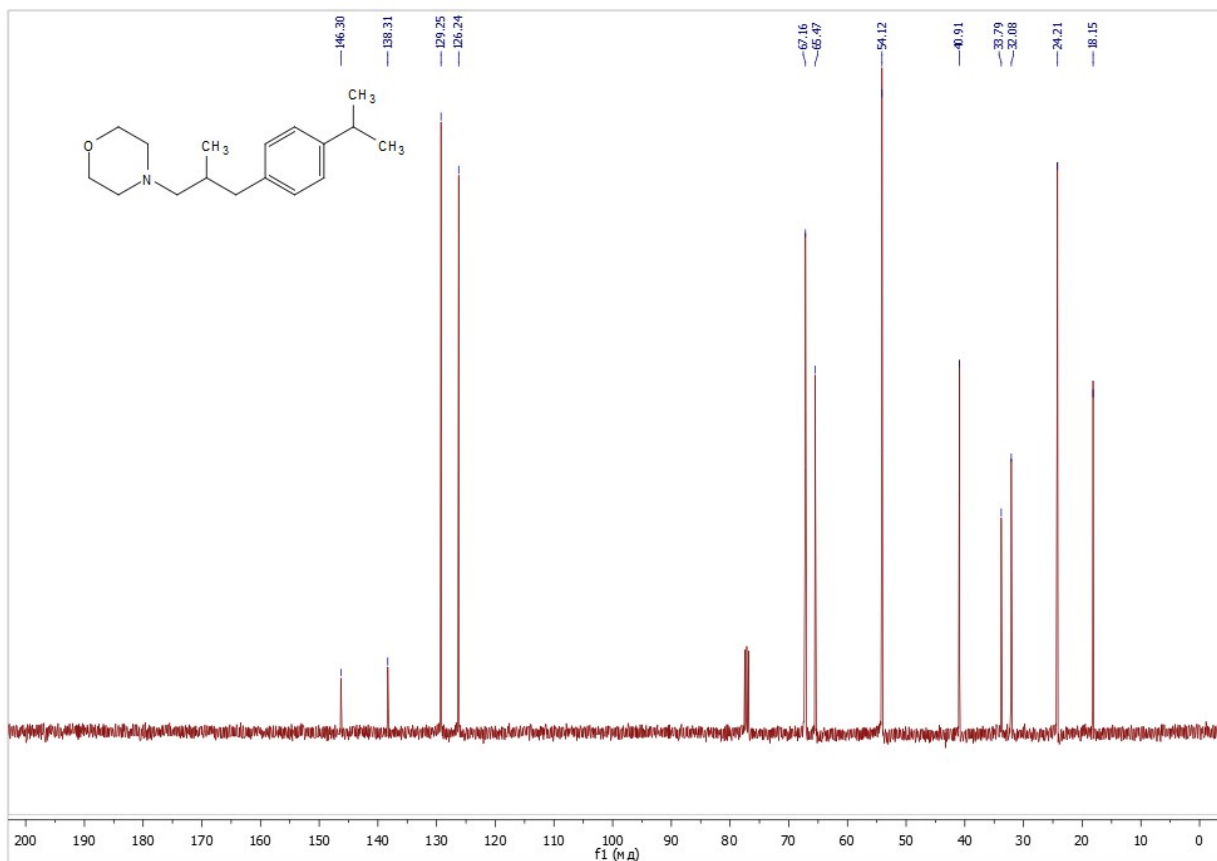

# Display Report

## Analysis Info

Analysis Name D:\Data\Kolotyrkina\2021\Novikov\0414023.d  
Method tune\_50-1600.m  
Sample Name /MNOV LB-05-iPr  
Comment C17H27NO mH 262.2165 calibrant added CH3CN

Acquisition Date 14.04.2021 16:14:00

Operator BDAL@DE  
Instrument / Ser# micrOTOF 10248

## Acquisition Parameter

|             |            |                      |          |                  |           |
|-------------|------------|----------------------|----------|------------------|-----------|
| Source Type | ESI        | Ion Polarity         | Positive | Set Nebulizer    | 1.0 Bar   |
| Focus       | Not active |                      |          | Set Dry Heater   | 200 °C    |
| Scan Begin  | 50 m/z     | Set Capillary        | 4500 V   | Set Dry Gas      | 4.0 l/min |
| Scan End    | 1600 m/z   | Set End Plate Offset | -500 V   | Set Divert Valve | Waste     |

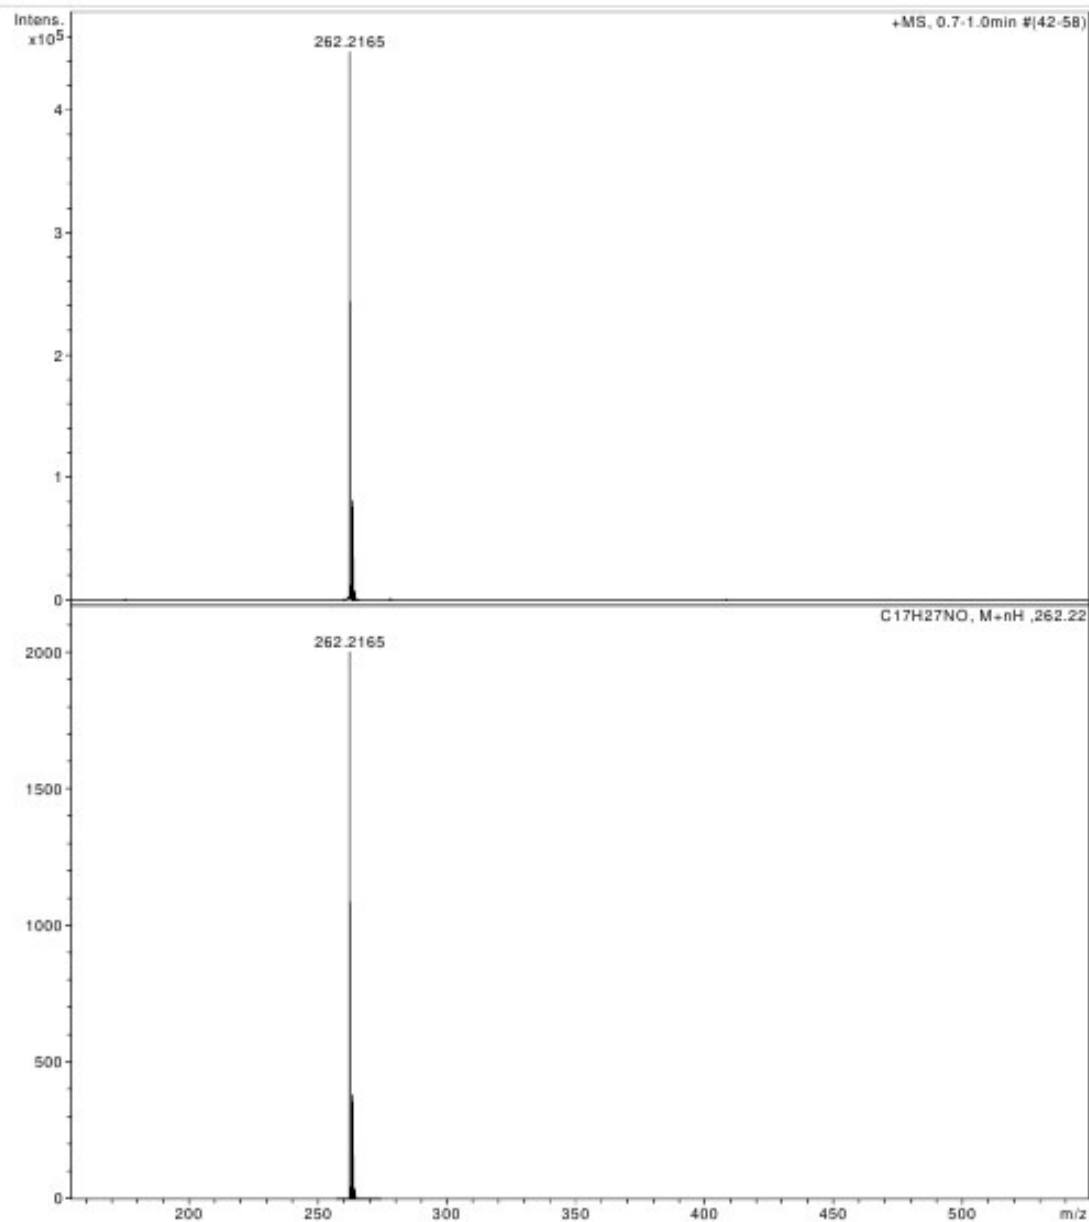



**4-(4-methoxybenzyl)morpholine (14)**  $^1\text{H}$  NMR (400 MHz,  $\text{CDCl}_3$ )

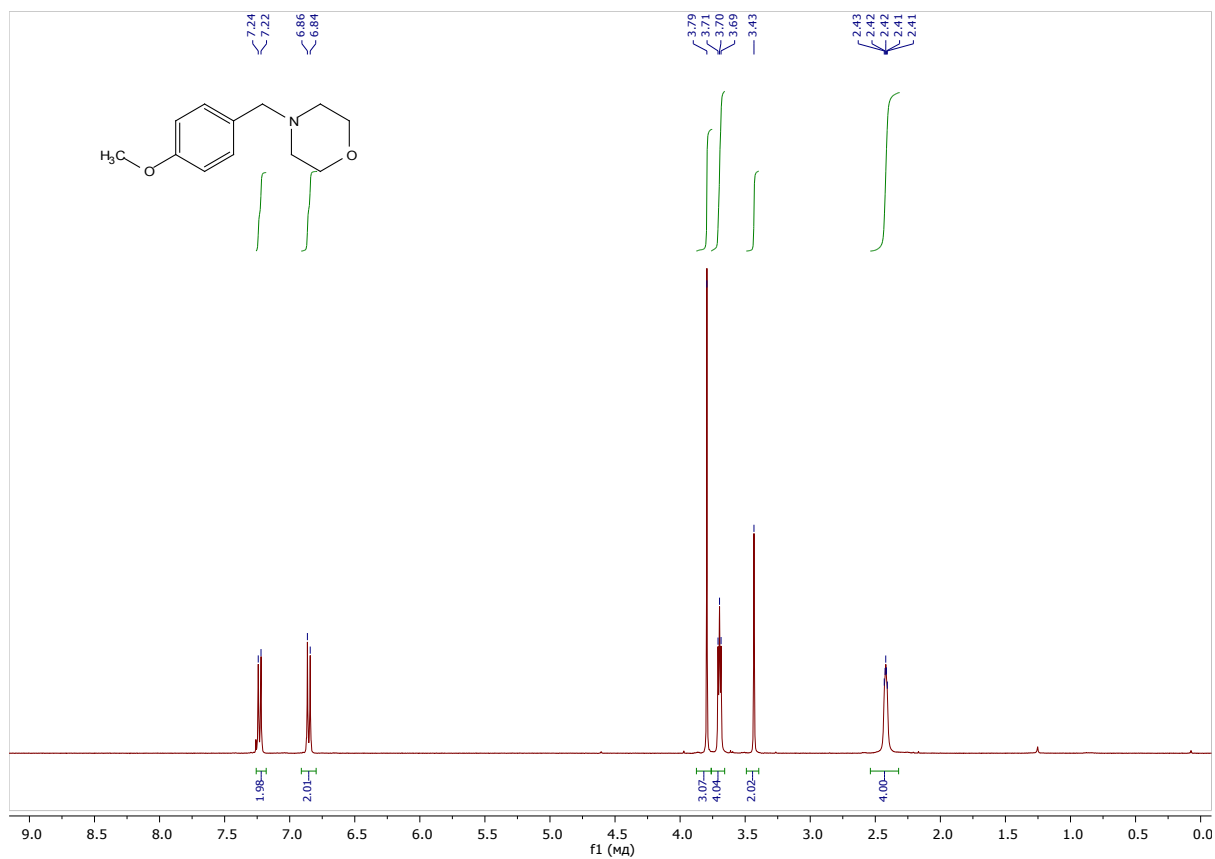

**4-(4-methoxybenzyl)morpholine (14)**  $^{13}\text{C}$  NMR (101 MHz,  $\text{CDCl}_3$ )

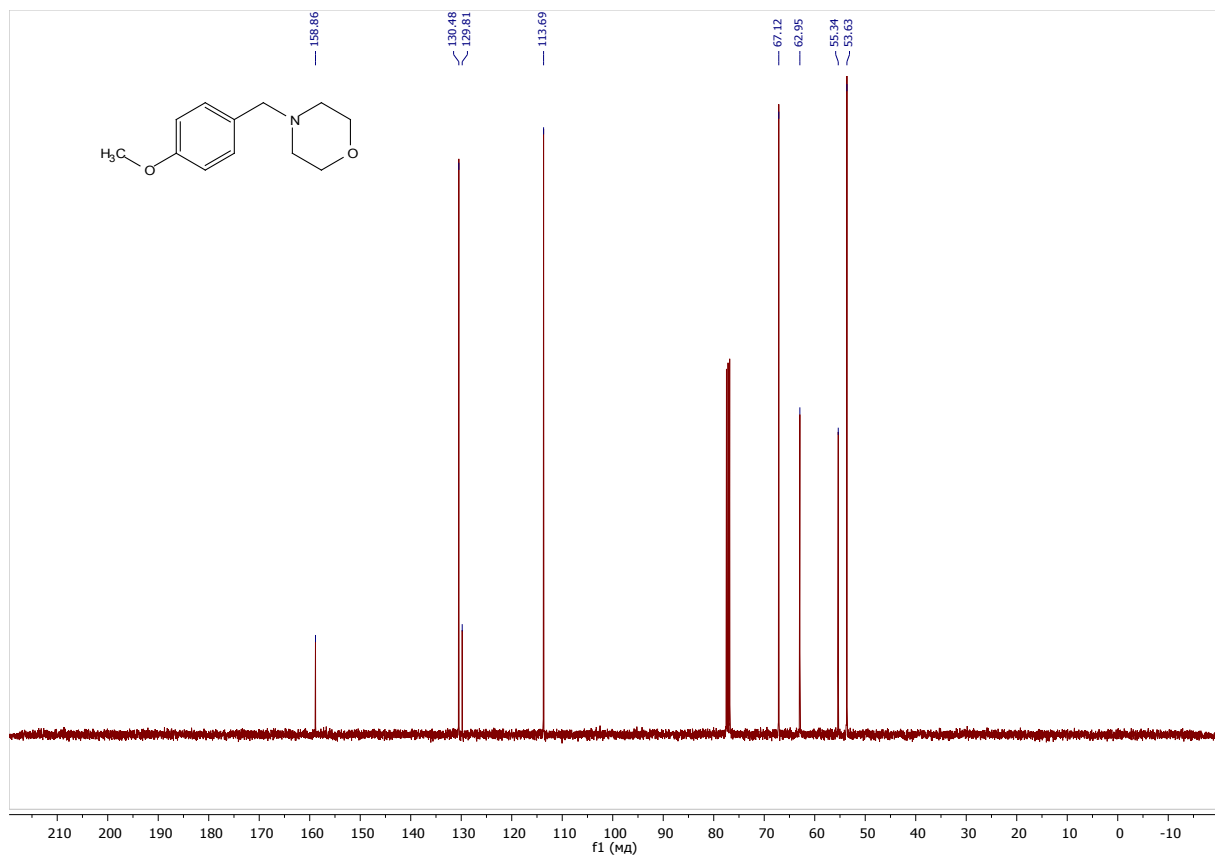

**2-methyl-N-(naphthalen-1-ylmethyl)propan-2-amine (15) <sup>1</sup>H NMR (400 MHz, CDCl<sub>3</sub>)**

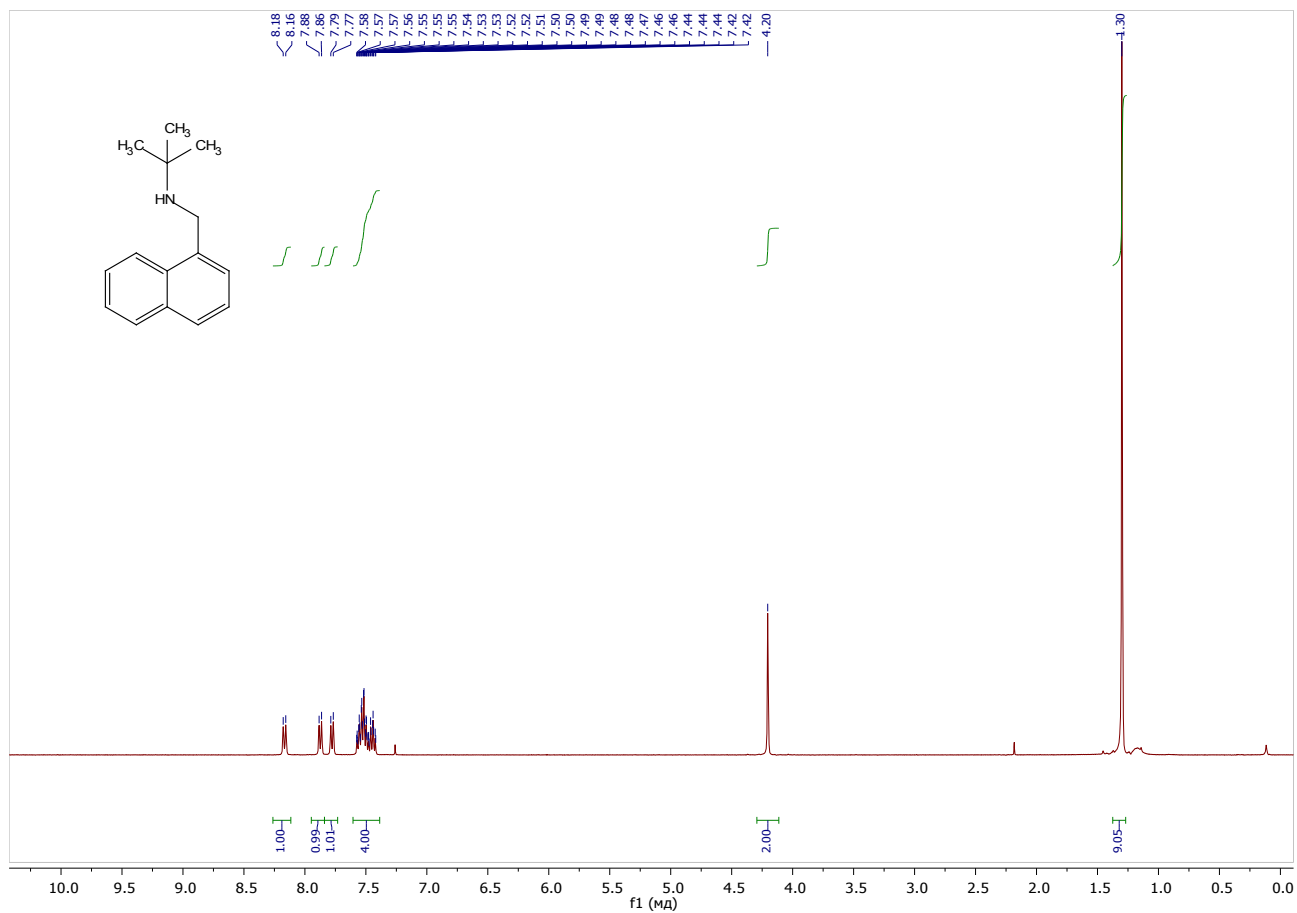

**2-methyl-N-(naphthalen-1-ylmethyl)propan-2-amine (15) <sup>13</sup>C NMR (101 MHz, CDCl<sub>3</sub>)**

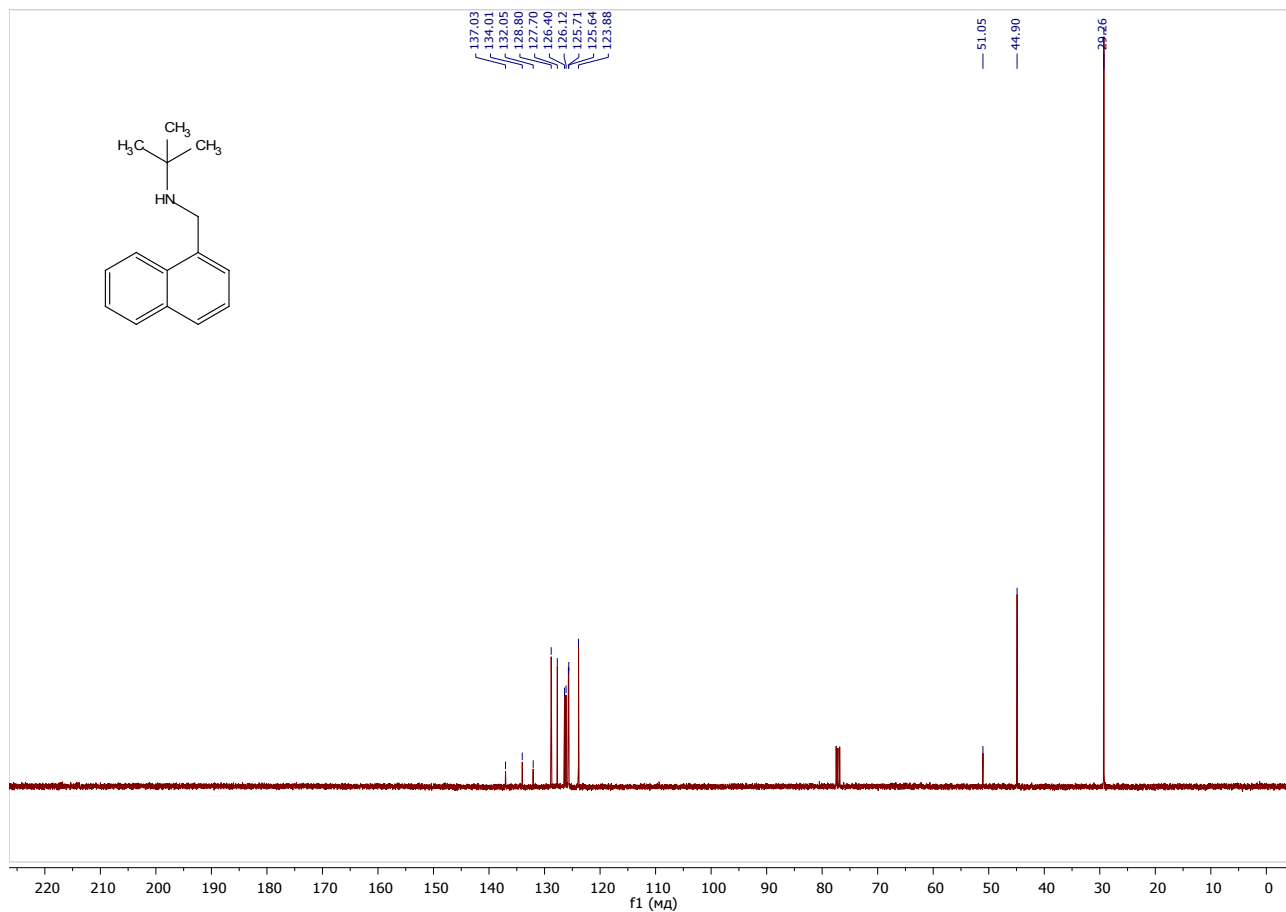

## 10. References

- 1 M. M. Vinogradov, Y. N. Kozlov, D. S. Nesterov, L. S. Shul'pina, A. J. L. Pombeiro and G. B. Shul'pin, *Catal. Sci. Technol.*, 2014, **4**, 3214–3226.
- 2 E. Z. Jandrasics and F. Richard Keene, *J. Chem. Soc. Dalt. Trans.*, 1997, 153–160.
- 3 D. A. Buckingham, F. P. Dwyer, H. A. Goodwin and A. M. Sargeson, *Aust. J. Chem.*, 1964, **17**, 325–336.
- 4 P. N. Kolesnikov, N. Z. Yagafarov, D. L. Usanov, V. I. Maleev and D. Chusov, *Org. Lett.*, 2015, **17**, 173–175.
- 5 E. Kuchuk, K. Muratov, D. S. Perekalin and D. Chusov, *Org. Biomol. Chem.*, 2019, **17**, 83–87.
- 6 C. Zhu and T. Akiyama, *Synlett*, 2011, **2011**, 1251–1254.
- 7 V. B. Kharitonov, E. Podyacheva, Y. V Nelyubina, D. V Muratov, A. S. Peregudov, G. Denisov, D. Chusov and D. A. Loginov, *Organometallics*, 2019, **38**, 3151–3158.
- 8 Q. Lei, Y. Wei, D. Talwar, C. Wang, D. Xue and J. Xiao, *Chem. – A Eur. J.*, 2013, **19**, 4021–4029.
- 9 L.-Y. Fu, J. Ying, X. Qi, J.-B. Peng and X.-F. Wu, *J. Org. Chem.*, 2019, **84**, 1421–1429.
- 10 O. I. Afanasyev, D. L. Usanov and D. Chusov, *Org. Biomol. Chem.*, 2017, **15**, 10164–10166.
- 11 Y. Otake, J. D. Williams, J. A. Rincón, O. de Frutos, C. Mateos and C. O. Kappe, *Org. Biomol. Chem.*, 2019, **17**, 1384–1388.
- 12 N. Z. Yagafarov, D. L. Usanov, A. P. Moskovets, N. D. Kagramanov, V. I. Maleev and D. Chusov, *ChemCatChem*, 2015, **7**, 2590–2593.
- 13 Gaussian 09, Revision D.01, M. J. Frisch, G. W. Trucks, H. B. Schlegel, G. E. Scuseria, M. A. Robb, J. R. Cheeseman, G. Scalmani, V. Barone, G. A. Petersson, H. Nakatsuji, X. Li, M. Caricato, A. Marenich, J. Bloino, B. G. Janesko, R. Gomperts, B. Mennucci, H. P. Hratchian, J. V. Ortiz, A. F. Izmaylov, J. L. Sonnenberg, D. Williams-Young, F. Ding, F. Lipparini, F. Egidi, J. Goings, B. Peng, A. Petrone, T. Henderson, D. Ranasinghe, V. G. Zakrzewski, J. Gao, N. Rega, G. Zheng, W. Liang, M. Hada, M. Ehara, K. Toyota, R. Fukuda, J. Hasegawa, M. Ishida, T. Nakajima, Y. Honda, O. Kitao, H. Nakai, T. Vreven, K. Throssell, J. A. Montgomery, Jr., J. E. Peralta, F. Ogliaro, M. Bearpark, J. J. Heyd, E. Brothers, K. N. Kudin, V. N. Staroverov, T. Keith, R. Kobayashi, J. Normand, K. Raghavachari, A. Rendell, J. C. Burant, S. S. Iyengar, J. Tomasi, M. Cossi, J. M. Millam, M. Klene, C. Adamo, R. Cammi, J. W. Ochterski, R. L. Martin, K. Morokuma, O. Farkas, J. B. Foresman, and D. J. Fox, Gaussian, Inc., Wallingford CT, 2016.
- 14 Y. Zhao and D. G. Truhlar, *J. Chem. Phys.*, 2006, **125**, 194101.
- 15 A. V Marenich, C. J. Cramer and D. G. Truhlar, *J. Phys. Chem. B*, 2009, **113**, 6378–6396.
- 16 O. V Dolomanov, L. J. Bourhis, R. J. Gildea, J. A. K. Howard and H. Puschmann, *J. Appl.*

- Crystallogr.*, 2009, **42**, 339–341.
- 17 G. Sheldrick, *Acta Crystallogr. Sect. A*, 2015, **71**, 3–8.
- 18 G. Sheldrick, *Acta Crystallogr. Sect. A*, 2008, **64**, 112–122.
